# Supplementary material for: A general and mild domino approach to substituted 1-aminoindoles
Source: Royal Society of Chemistry journal article supplement (doi:10.1039/c0cc03584j), 2010-11-12

## A general and mild domino approach to substituted 1-aminoindoles

*Nis Halland,\* Marc Nazaré , Jorge Alonso, Omar R'kyek and  
Andreas Lindenschmidt\**

### Supporting information

|                                                        |         |
|--------------------------------------------------------|---------|
| General information                                    | S2      |
| Synthesis of 2-halo-phenylacetylenes                   | S2      |
| General procedure for the 1-aminoindole formation      | S2      |
| Analytical data for 1-aminoindoles <b>3</b>            | S3-S10  |
| <sup>1</sup> H-NMR spectra for 1-aminoindoles <b>3</b> | S11-S34 |

**General:** The  $^1\text{H}$  and  $^{13}\text{C}$ -NMR spectra were recorded at 500 and 100 MHz respectively using TMS as an internal standard. All hydrazines, alkynes and 1,2-dihalobenzenes were commercially available and used as received without further purification. Transition metal salts, ligands, bases and other reagents as well as anhydrous solvents were also obtained from commercial sources and used as received. Flash chromatography was carried out on silica gel 60 (15-40 $\mu\text{m}$ ).

**General procedure for the Pd/Cu catalyzed preparation 2-chlorophenylacetylenes 1 from 1-chloro-2-iodobenzenes and terminal alkynes.**<sup>1</sup> To a solution of  $\text{PdCl}_2(\text{PPh}_3)_2$  (2.8 mol%), CuI (5.6 mol%),  $\text{PPh}_3$  (5.6 mol%) in diisopropylamine was added the 1-chloro-2-iodobenzene (1.0 equiv.) and alkyne (1.1 equiv.) and the mixture stirred for 1-6 h at rt to 50°C. Then the reaction mixture was filtered and evaporated, dissolved in EtOAc and washed with  $\text{NaHCO}_3$  (aq, sat.) solution. After drying over  $\text{Na}_2\text{SO}_4$  and evaporation the crude product was purified FC on silica gel using EtOAc/heptane as the eluent. This procedure usually afforded >90% yield of the desired 2-chlorophenylacetylene in high purity.

**General procedure for the one-pot domino formation of 1-aminoindoles 3:** To a screw-cap test tube was added  $\text{PdCl}_2$  (5 mol%),  $\text{tBu}_3\text{P}(\text{HfBF}_4)$  (10 mol%),  $\text{Cs}_2\text{CO}_3$  (1.4 equiv.) a magnetic stirring bar and commercially available anhydrous DMF (2.5 mL) and the mixture was stirred under argon at ambient temperature for 15 min. Then the 2-chlorophenylacetylene **1** (0.5mmol) and the hydrazine (1.4 equiv.) were added and the mixture was heated to 110°C for 3h. After cooling, the reaction mixture was diluted with  $\text{NaHCO}_3$  (aq, sat) and extracted with EtOAc (x2) and the organic phase dried over  $\text{Na}_2\text{SO}_4$  and evaporated. The crude product was purified by FC on silica gel using EtOAc/heptane as the eluent.

---

<sup>1</sup> I. Bytschkov, H. Siebeneicher, S. Doye, *Eur. J. Org. Chem.* **2003**, 2888.

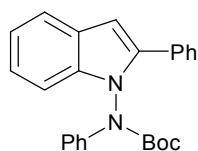

**Phenyl-(2-phenyl-indol-1-yl)-carbamic acid tert-butyl ester 3a** was prepared as described in the general procedure above and obtained as a slightly yellowish oil.  $^1\text{H-NMR}$  (DMSO- $d_6$ )  $\delta$  1.25 (s, 9H), 6.85 (s, 1H), 7.10-7.14 (m, 3H), 7.15-7.18 (m, 1H), 7.23 (d, 2H,  $J = 4.0$  Hz), 7.26-7.30 (m, 2H), 7.39-7.41 (m, 1H), 7.44 (t,  $J = 7.2$  Hz, 2H), 7.52 (d, 2H,  $J = 7.9$  Hz), 7.65 (d, 1H,  $J = 7.8$  Hz);  $^{13}\text{C-NMR}$  (DMSO- $d_6$ )  $\delta$  27.3, 82.5, 101.4, 109.2, 120.8, 121.0, 123.1, 125.3, 125.7, 127.4, 128.4, 128.7, 128.8, 130.5, 136.7, 139.7, 140.9, 152.0; HRMS (FAB): Calculated for  $\text{C}_{25}\text{H}_{25}\text{N}_2\text{O}_2$  ( $\text{M}+\text{H}^+$ ) 385.1916, found 385.1917.

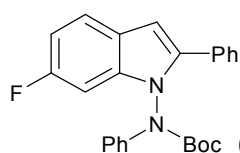

**(6-Fluoro-2-phenyl-indol-1-yl)-phenyl-carbamic acid tert-butyl ester 3b** was prepared as described in the general procedure above and obtained as a colorless oil.  $^1\text{H-NMR}$  (DMSO- $d_6$ )  $\delta$  1.27 (s, 9H), 6.87 (s, 1H), 7.03 (ddd, 1H,  $J = 9.8, 8.6, 2.3$  Hz), 7.07-7.16 (m, 4H), 7.29 (t, 2H,  $J = 7.9$  Hz), 7.39-7.42 (m, 1H), 7.43-7.47 (m, 2H), 7.49-7.52 (m, 2H), 7.66 (dd, 1H,  $J = 8.7, 5.3$  Hz);  $^{13}\text{C-NMR}$  (DMSO- $d_6$ )  $\delta$  27.3, 82.7, 95.9 (d,  $J = 27.2$  Hz), 101.4, 109.7 (d,  $J = 24.3$  Hz), 121.2, 122.2 (d,  $J = 9.9$  Hz), 122.3, 125.5, 127.4, 128.5, 128.8, 128.9, 136.9 (d,  $J = 11.9$  Hz), 140.5 (d,  $J = 4.3$  Hz), 140.6, 151.8, 159.7 (d,  $J = 238.6$  Hz); HRMS (FAB): Calculated for  $\text{C}_{25}\text{H}_{24}\text{N}_2\text{O}_2\text{F}$  ( $\text{M}+\text{H}^+$ ) 403.1822, found 403.1815.

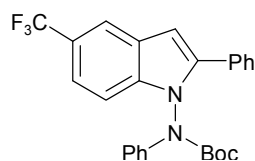

**Phenyl-(2-phenyl-5-trifluoromethyl-indol-1-yl)-carbamic acid tert-butyl ester 3c** was prepared as described in the general procedure above and obtained as a colorless oil.  $^1\text{H-NMR}$  (DMSO- $d_6$ )  $\delta$  1.25 (s, 9H), 7.03 (s, 1H), 7.11-7.17 (m, 3H), 7.30 (t, 2H,  $J = 7.9$  Hz), 7.41-7.49 (m, 4H), 7.52-7.56 (m, 3H), 8.08 (s, 1H);  $^{13}\text{C-NMR}$  (DMSO- $d_6$ )  $\delta$  27.3, 83.0, 102.1, 110.1, 118.5, 119.7, 122.2 (q,  $J = 31.3$  Hz), 125.1 (q,  $J = 271.6$  Hz), 125.2, 125.6, 127.6, 128.3 (q,  $J = 39.0$  Hz), 128.9, 129.0, 129.8, 138.1, 140.6, 141.7, 151.7; HRMS (FAB): Calculated for  $\text{C}_{26}\text{H}_{24}\text{N}_2\text{O}_2\text{F}_3$  ( $\text{M}+\text{H}^+$ ) 453.1790, found 453.1785.

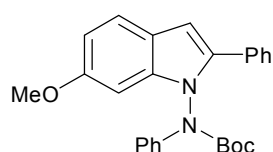

**(6-Methoxy-2-phenyl-indol-1-yl)-phenyl-carbamic acid tert-butyl ester 3d** was prepared as described in the general procedure above and obtained as a colorless oil.  $^1\text{H-NMR}$  (DMSO- $d_6$ )  $\delta$  1.27 (s, 9H), 3.74 (s, 3H), 6.67 (d, 1H,  $J = 1.9$  Hz), 6.76 (d, 1H,  $J = 0.6$  Hz), 6.83 (dd, 1H,  $J = 8.5, 2.2$  Hz), 7.10-7.13 (m, 3H), 7.27 (t, 2H,  $J = 7.8$  Hz), 7.33-7.37 (m, 1H), 7.41 (t, 2H,  $J = 7.6$  Hz), 7.45-7.48 (m, 2H), 7.53 (d, 1H,  $J = 8.5$  Hz);  $^{13}\text{C-NMR}$  (DMSO- $d_6$ )  $\delta$  27.3, 55.3, 82.4, 92.8, 101.3, 110.5, 119.7, 121.0, 121.6, 125.2, 127.1, 127.9, 128.6, 128.8, 130.8, 137.8, 138.5, 140.8, 151.9, 156.8; HRMS (FAB): Calculated for  $\text{C}_{26}\text{H}_{27}\text{N}_2\text{O}_3$  ( $\text{M}+\text{H}^+$ ) 415.2022, found 415.2028.

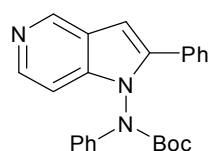

**Phenyl-(2-phenyl-pyrrolo[3,2-c]pyridin-1-yl)-carbamic acid tert-butyl ester 3e** was prepared as described in the general procedure above and obtained as a colorless oil.  $^1\text{H-NMR}$  (DMSO- $d_6$ )  $\delta$  1.26 (br s, 9H), 7.00 (s, 1H), 7.10-7.17 (m, 3H), 7.26-7.36 (m, 3H), 7.42-7.51 (m, 3H), 7.51-7.55 (m, 2H), 8.32 (d, 1H,  $J = 5.5$  Hz), 8.94 (br s, 1H);  $^{13}\text{C-NMR}$  (DMSO- $d_6$ )  $\delta$  27.3, 82.9, 100.3, 104.6, 121.2, 122.3, 125.7, 127.7, 128.8, 129.0, 129.7, 140.4, 140.5, 140.7, 142.2, 143.4, 151.5; HRMS (FAB): Calculated for  $\text{C}_{24}\text{H}_{24}\text{N}_3\text{O}_2$  ( $\text{M}+\text{H}^+$ ) 386.1869, found 386.1882.

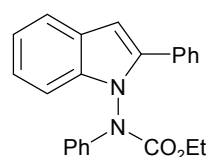

**Phenyl-(2-phenyl-indol-1-yl)-carbamic acid ethyl ester 3f** was prepared as described in the general procedure above and obtained as a colorless oil.  $^1\text{H-NMR}$  (DMSO- $d_6$ )  $\delta$  1.06 (br t, 3H,  $J = 6.7$  Hz), 4.21 (m, 2H), 6.86 (s, 1H), 7.06 (d, 2H,  $J = 7.8$  Hz), 7.12 (t, 1H,  $J = 7.4$  Hz), 7.17 (t, 1H,  $J = 7.4$  Hz), 7.22-7.28 (m, 3H), 7.33 (d, 1H,  $J = 8.0$  Hz), 7.38-7.42 (m, 1H), 7.45 (t, 1H,  $J = 7.4$  Hz), 7.50-7.53 (m, 2H), 7.65 (d, 1H,  $J = 7.8$  Hz);  $^{13}\text{C-NMR}$  (DMSO- $d_6$ )  $\delta$  14.0, 62.8, 101.7, 109.4, 120.8, 121.3, 121.4, 123.2, 125.6, 125.8, 127.4, 128.4, 128.8, 128.9, 130.4, 136.5, 139.3, 140.6, 153.6; HRMS (FAB): Calculated for  $\text{C}_{23}\text{H}_{21}\text{N}_2\text{O}_2$  ( $\text{M}+\text{H}^+$ ) 357.1603, found 357.1595.

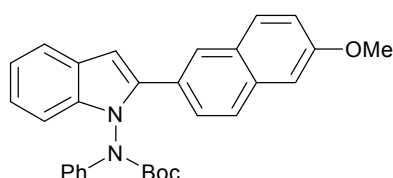

**[2-(6-Methoxy-naphthalen-2-yl)-indol-1-yl]-phenyl-carbamic acid tert-butyl ester 3g** was prepared as described in the general procedure above and obtained as a yellowish solid.  $^1\text{H-NMR}$  (DMSO- $d_6$ )  $\delta$  1.30 (s, 9H), 3.92 (s, 3H), 6.95 (s, 1H), 7.11-7.17 (m, 3H), 7.19-7.35 (m, 6H), 7.39 (d, 1H,  $J = 2.3$  Hz), 7.66 (dd, 1H,  $J = 8.7$ , 1.6 Hz), 7.70 (d, 1H,  $J = 7.8$  Hz), 7.74 (d, 1H,  $J = 9.2$  Hz), 7.93 (d, 1H,  $J = 8.9$  Hz), 7.98 (s, 1H);  $^{13}\text{C-NMR}$  (DMSO- $d_6$ )  $\delta$  27.6, 55.2, 82.5, 101.5, 105.9, 109.2, 119.3, 120.7, 121.2, 123.1, 125.4, 125.6, 125.8, 126.1, 127.1, 128.1, 128.5, 128.8, 129.4, 133.8, 136.9, 139.8, 141.0, 152.1, 157.8; HRMS (ESI): Calculated for  $\text{C}_{30}\text{H}_{29}\text{N}_2\text{O}_3$  ( $\text{M}+\text{H}^+$ ) 465.2178, found 465.2175.

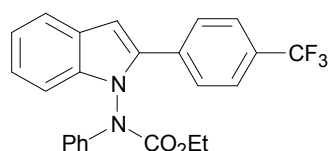

**Phenyl-[2-(4-trifluoromethyl-phenyl)-indol-1-yl]-carbamic acid ethyl ester 3h** was prepared as described in the general procedure above and obtained as a colourless crystalline solid.  $^1\text{H-NMR}$  (DMSO- $d_6$ )  $\delta$  1.08 (t, 3H,  $J = 7.1$  Hz), 4.26 (m, 2H), 7.08 (s, 1H), 7.11 (d, 2H,  $J = 8.6$  Hz), 7.17 (t, 1H,  $J = 7.6$  Hz), 7.25 (t, 1H,  $J = 7.6$  Hz), 7.28-7.35 (m, 3H), 7.41 (d, 1H,  $J = 8.6$  Hz), 7.75 (d, 1H,  $J = 7.9$  Hz), 7.80 (d, 2H,  $J = 8.31$  Hz), 7.91 (d, 2H,  $J = 8.6$  Hz);  $^{13}\text{C-NMR}$  (DMSO- $d_6$ )  $\delta$  14.0, 63.1, 103.5, 109.6, 121.2, 121.3, 121.6, 124.0, 124.0 (q,  $J = 272.6$  Hz), 125.4, 125.8 (q,  $J = 3.6$  Hz), 125.9, 127.9, 128.4 (q,  $J = 32.1$  Hz), 129.0, 134.3, 136.9, 137.5, 140.4, 153.5; HRMS (ESI): Calculated for  $\text{C}_{24}\text{H}_{20}\text{N}_2\text{O}_2\text{F}_3$  ( $\text{M}+\text{H}^+$ ) 425.1477, found 425.1476.

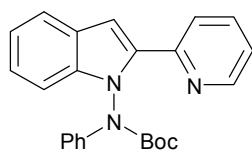

**Phenyl-(2-pyridin-2-yl-indol-1-yl)-carbamic acid tert-butyl ester 3i** was prepared as described in the general procedure above and obtained as a colorless oil.  $^1\text{H-NMR}$  (DMSO- $d_6$ )  $\delta$  1.23 (br s, 9H), 7.05-7.09 (m, 1H), 7.15 (t, 1H,  $J = 7.4$  Hz), 7.22-7.31 (m, 8H), 7.67 (d, 1H,  $J = 7.8$  Hz), 7.86 (dt, 1H,  $J = 1.7, 7.4$  Hz), 7.92 (d, 1H,  $J = 8.0$  Hz), 8.53 (d, 1H,  $J = 4.7$  Hz);  $^{13}\text{C-NMR}$  (DMSO- $d_6$ )  $\delta$  27.4, 81.5, 102.9, 109.1, 121.1, 121.6, 121.8, 122.5, 123.9, 124.7, 124.8, 128.4, 136.7, 136.8, 137.2, 141.4, 149.1, 149.8, 151.9; HRMS (FAB): Calculated for  $\text{C}_{24}\text{H}_{24}\text{N}_3\text{O}_2$  ( $\text{M}+\text{H}^+$ ) 386.1869, found 386.1874.

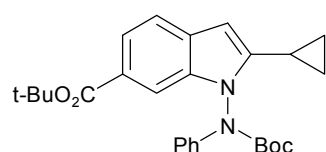

**1-(tert-Butoxycarbonyl-phenyl-amino)-2-cyclopropyl-1H-indole-**

**6-carboxylic acid tert-butyl ester 3j** was prepared as described in the general procedure above and obtained as a colorless oil.  $^1\text{H-NMR}$  (DMSO- $d_6$ )  $\delta$  0.67-0.77 (m, 2H), 0.85-0.92 (m, 1H), 1.01-1.07 (m, 1H), 1.35 (s, 9H), 1.52 (s, 9H), 1.71-1.77 (m, 1H), 6.28 (s, 1H), 7.21 (t, 1H,  $J = 7.4$  Hz), 7.30 (d, 2H,  $J = 7.5$  Hz), 7.38 (d, 1H,  $J = 7.4$  Hz), 7.40 (d, 1H,  $J = 7.3$  Hz), 7.55 (d, 1H,  $J = 8.2$  Hz), 7.64 (dd, 1H,  $J = 8.3, 1.5$  Hz), 7.68 (s, 1H);  $^{13}\text{C-NMR}$  (DMSO- $d_6$ )  $\delta$  6.5, 7.4, 7.9, 27.4, 27.8, 80.1, 82.7, 96.1, 109.0, 119.7, 121.3, 124.6, 125.5, 129.0, 129.1, 135.1, 140.9, 147.1, 151.7, 165.5; HRMS (FAB): Calculated for  $\text{C}_{27}\text{H}_{33}\text{N}_2\text{O}_4$  ( $\text{M}+\text{H}^+$ ) 449.2440, found 449.2459.

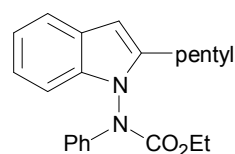

**(2-Pentyl-indol-1-yl)-phenyl-carbamic acid ethyl ester 3k** was prepared

as described in the general procedure above and obtained as a brown oil.  $^1\text{H-NMR}$  (DMSO- $d_6$ )  $\delta$  0.82 (t, 3H,  $J = 7.3$  Hz), 1.11 (t, 3H,  $J = 7.3$  Hz), 1.21-1.34 (m, 4H), 1.53-1.66 (m, 2H), 2.56 (t, 2H,  $J = 7.7$  Hz), 4.19-4.28 (m, 2H), 6.40 (s, 1H), 7.12 (dt, 1H,  $J = 1.2, 7.7$  Hz), 7.14-7.18 (m, 1H), 7.20-7.28 (m, 4H), 7.37-7.42 (m, 2H), 7.57 (d, 1H,  $J = 7.6$  Hz);  $^{13}\text{C-NMR}$  (DMSO- $d_6$ )  $\delta$  13.7, 14.1, 21.7, 24.8, 26.8, 30.7, 62.8, 98.6, 108.4, 120.0, 120.5, 121.0, 121.9, 125.5, 125.6, 129.0, 135.3, 140.6, 140.8, 153.3; HRMS (ESI): Calculated for  $\text{C}_{22}\text{H}_{27}\text{N}_2\text{O}_2$  ( $\text{M}+\text{H}^+$ ) 351.2073, found 351.2072.

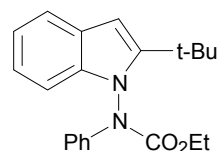

**(2-tert-Butyl-indol-1-yl)-phenyl-carbamic acid ethyl ester 3l** was

prepared as described in the general procedure above and obtained as a brown oil.  $^1\text{H-NMR}$  (DMSO- $d_6$ )  $\delta$  1.03 (t, 3H,  $J = 7.3$  Hz), 1.12 (s, 9H), 4.16 (q, 2H,  $J = 7.3$  Hz), 6.43 (s, 1H), 7.06 (d, 1H,  $J = 8.1$  Hz), 7.15 (t, 1H,  $J = 7.4$  Hz), 7.17-7.24 (m, 4H), 7.37-7.42 (m, 2H), 7.61 (d, 1H,  $J = 7.8$  Hz);  $^{13}\text{C-NMR}$  (DMSO- $d_6$ )  $\delta$  14.0, 29.4, 31.9, 62.8, 98.7, 108.2, 119.8, 120.4, 120.7, 122.4, 124.7, 124.8, 128.8, 137.3, 141.4, 147.7, 153.6; HRMS (ESI): Calculated for  $\text{C}_{21}\text{H}_{25}\text{N}_2\text{O}_2$  ( $\text{M}+\text{H}^+$ ) 337.1916, found 337.1918.

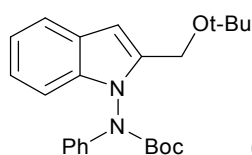

**(2-tert-Butoxymethyl-indol-1-yl)-phenyl-carbamic acid tert-butyl ester**

**3m** was prepared as described in the general procedure above and obtained as a yellowish oil.

$^1\text{H-NMR}$  (DMSO- $d_6$ )  $\delta$  1.11 (s, 9H), 1.34 (s, 9H), 4.41 (s, 2H), 6.58 (s, 1H), 7.10-7.14 (m, 4H), 7.32-7.43 (m, 4H), 7.62 (d, 2H,  $J = 7.9$  Hz);  $^{13}\text{C-NMR}$  (DMSO- $d_6$ )  $\delta$  26.9, 27.4, 55.1, 73.1, 82.1, 101.3, 108.4, 120.5, 120.7, 121.3, 122.6, 124.9, 125.1, 128.4, 136.0, 137.8, 141.1, 151.8; HRMS (ESI): Calculated for  $\text{C}_{24}\text{H}_{31}\text{N}_2\text{O}_3$  ( $\text{M}+\text{H}^+$ ) 395.2335, found 395.2329.

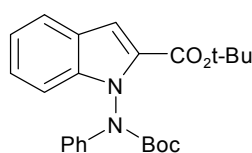

**1-(tert-Butoxycarbonyl-phenyl-amino)-1H-indole-2-carboxylic acid**

**tert-butyl ester 3n** was prepared as described in the general procedure above and obtained as

a brown oil.  $^1\text{H-NMR}$  (DMSO- $d_6$ )  $\delta$  1.32 (br s, 9H), 1.46 (s, 9H), 7.15 (t, 1H,  $J = 7.2$  Hz), 7.20 (t, 1H,  $J = 7.4$  Hz), 7.26-7.30 (m, 3H), 7.33 (d, 1H,  $J = 8.0$  Hz), 7.36 (d, 1H,  $J = 8.5$  Hz), 7.75 (d, 1H,  $J = 8.0$  Hz);  $^{13}\text{C-NMR}$  (DMSO- $d_6$ )  $\delta$  27.5, 27.7, 81.4, 82.0, 109.4, 109.9, 120.9, 121.7, 122.6, 123.2, 124.9, 126.3, 128.3, 128.5, 137.4, 141.0, 151.6, 158.8; HRMS (FAB): Calculated for  $\text{C}_{24}\text{H}_{28}\text{N}_2\text{O}_4\text{Na}$  ( $\text{M}+\text{Na}^+$ ) 431.1947, found 431.1952.

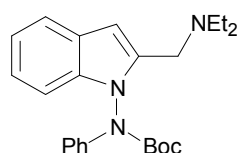

**(2-Diethylaminomethyl-indol-1-yl)-phenyl-carbamic acid tert-butyl**

**ester 3o** was prepared as described in the general procedure above and obtained as a black oil.

$^1\text{H-NMR}$  (DMSO- $d_6$ )  $\delta$  1.04 (t, 6H,  $J = 7.4$  Hz), 1.34 (s, 9H), 2.57 (q, 4H,  $J = 7.4$  Hz), 3.71 (s, 2H), 6.68 (d, 1H,  $J = 8.4$  Hz), 6.78 (dt, 1H,  $J = 1.0, 7.7$  Hz), 7.17 (t, 1H,  $J = 7.5$  Hz), 7.23 (t, 1H,  $J = 7.9$  Hz), 7.31 (dd, 1H,  $J = 1.4, 7.9$  Hz), 7.36-7.41 (m, 2H), 7.60 (d, 2H,  $J = 8.1$  Hz), 8.16 (s, 1H);  $^{13}\text{C-NMR}$  (DMSO- $d_6$ )  $\delta$  12.5, 27.6, 41.3, 46.7, 80.0, 81.0, 91.4, 106.8, 110.5, 118.9, 122.1, 124.4, 128.2, 129.2, 132.1, 142.7, 148.9, 153.1; HRMS (ESI): Calculated for  $\text{C}_{24}\text{H}_{32}\text{N}_3\text{O}_2$  ( $\text{M}+\text{H}^+$ ) 394.2495, found 394.2492.

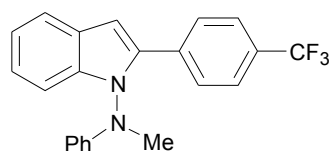

**Methyl-phenyl-[2-(4-trifluoromethyl-phenyl)-indol-1-yl]-amine**

**3p** was prepared as described in the general procedure above and obtained as a brown oil.  $^1\text{H-NMR}$  (DMSO- $d_6$ )  $\delta$  3.48 (s, 3H), 6.50 (d, 2H,  $J = 8.1$  Hz), 6.84 (t, 1H,  $J = 7.6$  Hz), 7.01-7.04 (m, 1H), 7.04 (s, 1H), 7.16 (dd, 2H,  $J = 2.9, 6.3$  Hz), 7.23 (dd, 2H,  $J = 7.6, 8.9$  Hz), 7.71-7.75 (m, 1H), 7.82 (d, 2H,  $J = 8.6$  Hz), 7.93 (d, 2H,  $J = 8.6$  Hz);  $^{13}\text{C-NMR}$  (DMSO- $d_6$ )  $\delta$  39.8, 101.8, 110.6, 112.0, 119.5, 121.1, 121.4, 124.1 (q,  $J = 273$  Hz), 123.1, 125.5 (q,  $J = 3.7$  Hz), 126.1, 128.0, 128.1 (q,  $J = 32$  Hz), 129.4, 134.8, 135.2, 137.7, 148.5; HRMS (FAB): Calculated for  $\text{C}_{22}\text{H}_{18}\text{F}_3\text{N}_2$  ( $\text{M}+\text{H}^+$ ) 367.1422, found 367.1410.

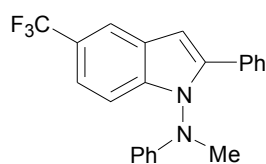

**Methyl-phenyl-(2-phenyl-5-trifluoromethyl-indol-1-yl)-amine 3q**

was prepared as described in the general procedure above and obtained as a brown oil.  $^1\text{H-NMR}$  (DMSO- $d_6$ )  $\delta$  3.50 (s, 3H), 6.50 (d, 2H,  $J = 7.9$  Hz), 6.87 (t, 1H,  $J = 7.6$  Hz), 7.06 (s, 1H), 7.23-7.29 (m, 3H), 7.43-7.52 (m, 4H), 7.72 (d, 2H,  $J = 7.7$  Hz), 8.14 (s, 1H);  $^{13}\text{C-NMR}$  (DMSO- $d_6$ )  $\delta$  39.8, 101.0, 111.1, 111.9, 118.5, 118.7, 119.6, 121.8 (q,  $J = 31$  Hz), 125.2 (q,  $J = 270$  Hz), 125.6, 127.8, 128.6, 128.7, 129.5, 130.2, 136.5, 141.6, 148.2; HRMS (FAB): Calculated for  $\text{C}_{22}\text{H}_{18}\text{F}_3\text{N}_2$  ( $\text{M}+\text{H}^+$ ) 367.1422, found 367.1426.

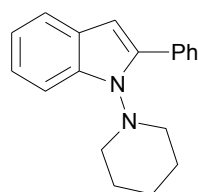

**2-Phenyl-1-piperidin-1-yl-1H-indole 3r** was prepared as described in the

general procedure above and obtained as a brown oil.  $^1\text{H-NMR}$  (DMSO- $d_6$ )  $\delta$  1.41 (br s, 2H), 1.65 (quintet, 4H,  $J = 5.6$  Hz), 2.75 (br s, 4H), 6.06 (s, 1H), 6.72 (t, 1H,  $J = 7.5$  Hz), 7.19 (d, 1H,  $J = 8.5$  Hz), 7.29 (t, 1H,  $J = 7.8$  Hz), 7.37 (t, 1H,  $J = 7.8$  Hz), 7.46-7.56 (m, 3H), 7.67 (d, 2H,  $J = 7.8$  Hz);  $^{13}\text{C-NMR}$  (DMSO- $d_6$ )  $\delta$  23.1, 25.6, 55.8, 85.7, 94.9, 105.0, 112.0, 117.3, 122.6, 128.4, 128.5, 130.0, 131.2, 132.0, 148.3; HRMS (ESI): Calculated for  $\text{C}_{19}\text{H}_{21}\text{N}_2$  ( $\text{M}+\text{H}^+$ ) 277.1705, found 277.1700.



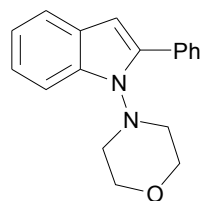

**1-Morpholin-4-yl-2-phenyl-1H-indole 3s** was prepared as described in the general procedure above and obtained as a brown oil.  $^1\text{H-NMR}$  (DMSO- $d_6$ )  $\delta$  2.83 (br s, 4H), 3.75 (br s, 4H), 6.34 (s, 1H), 6.75 (dt, 1H,  $J = 1.2, 7.5$  Hz), 7.24 (d, 1H,  $J = 8.2$  Hz), 7.39 (dd, 1H,  $J = 1.4, 7.8$  Hz), 7.47-7.54 (m, 3H), 7.70 (dd, 2H,  $J = 1.7, 8.2$  Hz);  $^{13}\text{C-NMR}$  (DMSO- $d_6$ )  $\delta$  54.8, 66.3, 85.7, 94.9, 105.3, 112.1, 117.5, 122.7, 128.4, 128.5, 130.0, 131.3, 132.1, 148.0; HRMS (ESI): Calculated for  $\text{C}_{18}\text{H}_{19}\text{N}_2\text{O}$  ( $\text{M}+\text{H}^+$ ) 279.1497, found 279.1497.

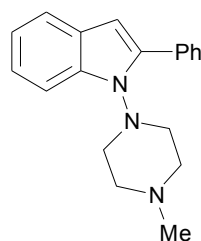

**1-(4-Methyl-piperazin-1-yl)-2-phenyl-1H-indole 3t** was prepared as described in the general procedure above and obtained as a brown oil.  $^1\text{H-NMR}$  (DMSO- $d_6$ )  $\delta$  2.22 (s, 3H), 2.48 (br s, 4H), 2.83 (s, 4H), 6.18 (s, 1H), 6.72 (dt, 1H,  $J = 1.1, 7.6$  Hz), 7.18 (d, 1H,  $J = 8.6$  Hz), 7.28 (t, 1H,  $J = 8.2$  Hz), 7.36 (dd, 1H,  $J = 1.4, 7.8$  Hz), 7.44-7.53 (m, 3H), 7.68 (dd, 2H,  $J = 1.8, 8.3$  Hz);  $^{13}\text{C-NMR}$  (DMSO- $d_6$ )  $\delta$  45.5, 54.1, 54.7, 85.8, 94.9, 105.2, 112.1, 117.4, 122.7, 128.4, 128.5, 130.0, 131.3, 132.1, 148.2; HRMS (ESI): Calculated for  $\text{C}_{19}\text{H}_{22}\text{N}_3$  ( $\text{M}+\text{H}^+$ ) 292.1814, found 292.1812.

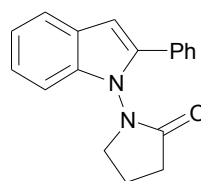

**1-(2-Phenyl-indol-1-yl)-pyrrolidin-2-one 3u** was prepared as described in the general procedure above and obtained as a colourless crystalline solid.  $^1\text{H-NMR}$  (DMSO- $d_6$ )  $\delta$  1.92-2.04 (m, 1H), 2.15-2.25 (m, 1H), 2.37-2.45 (m, 1H), 2.63-2.72 (m, 1H), 3.27-3.32 (m, 1H), 3.76 (m, 1H), 6.82 (s, 1H), 7.21 (t, 1H,  $J = 7.6$  Hz), 7.28 (t, 1H,  $J = 7.6$  Hz), 7.40 (d, 1H,  $J = 8.3$  Hz), 7.48 (m, 1H), 7.55 (t, 2H,  $J = 7.5$  Hz), 7.59-7.62 (m, 2H), 7.68 (d, 1H,  $J = 8.5$  Hz);  $^{13}\text{C-NMR}$  (DMSO- $d_6$ )  $\delta$  16.6, 27.9, 47.6, 101.3, 109.5, 120.7, 121.1, 122.7, 125.9, 127.3, 128.3, 128.8, 130.3, 135.8, 139.3, 173.4; HRMS (ESI): Calculated for  $\text{C}_{18}\text{H}_{17}\text{N}_2\text{O}$  ( $\text{M}+\text{H}^+$ ) 277.1341, found 277.1340.

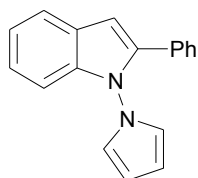

**2-Phenyl-1-pyrrol-1-yl-1H-indole 3v** was prepared as described in the general procedure above and obtained as a colourless crystalline solid.  $^1\text{H-NMR}$  (DMSO- $d_6$ )  $\delta$  6.28 (t, 2H,  $J = 2.3$  Hz), 6.89 (d, 1H,  $J = 8.0$  Hz), 6.99 (s, 1H), 7.15 (t, 2H,  $J = 2.3$  Hz), 7.20-7.28 (m, 2H), 7.36, (br s, 5H), 7.72 (d, 1H,  $J = 7.6$  Hz);  $^{13}\text{C-NMR}$  (DMSO- $d_6$ )  $\delta$  101.1, 108.1, 108.6, 120.6, 121.5, 122.5, 123.3, 125.0, 126.6, 128.1, 128.5, 129.8, 138.7, 139.2; HRMS (ESI): Calculated for  $\text{C}_{18}\text{H}_{15}\text{N}_2$  ( $\text{M}+\text{H}^+$ ) 259.1235, found 259.1232.

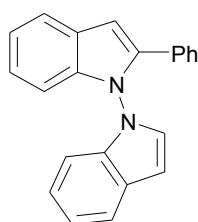

**2-Phenyl-[1,1']biindolyl 3w** was prepared as described in the general procedure above and obtained as a brown oil.  $^1\text{H-NMR}$  (DMSO- $d_6$ )  $\delta$  6.64 (d, 1H,  $J = 8.3$  Hz), 6.67 (d, 1H,  $J = 8.0$  Hz), 6.74 (dd, 1H,  $J = 0.8, 3.5$  Hz), 7.08 (s, 1H), 7.09-7.15 (m, 2H), 7.17 (dt, 1H,  $J = 1.0, 8.3$  Hz), 7.24 (dt, 1H,  $J = 1.0, 7.6$  Hz), 7.27-7.32 (m, 3H), 7.40-7.44 (m, 2H), 7.71 (d, 1H,  $J = 8.0$  Hz), 7.78 (d, 1H,  $J = 8.0$  Hz), 7.92 (d, 1H,  $J = 3.5$  Hz);  $^{13}\text{C-NMR}$  (DMSO- $d_6$ )  $\delta$  101.8, 102.1, 108.4, 108.8, 120.9, 121.2, 121.7, 123.1, 123.4, 125.6, 125.9, 126.9, 128.2, 128.5, 129.5, 129.9, 136.0, 138.5, 140.2; HRMS (ESI): Calculated for  $\text{C}_{22}\text{H}_{17}\text{N}_2$  ( $\text{M}+\text{H}^+$ ) 309.1392, found 309.1390.

Instrument : FN-DRX500

3a

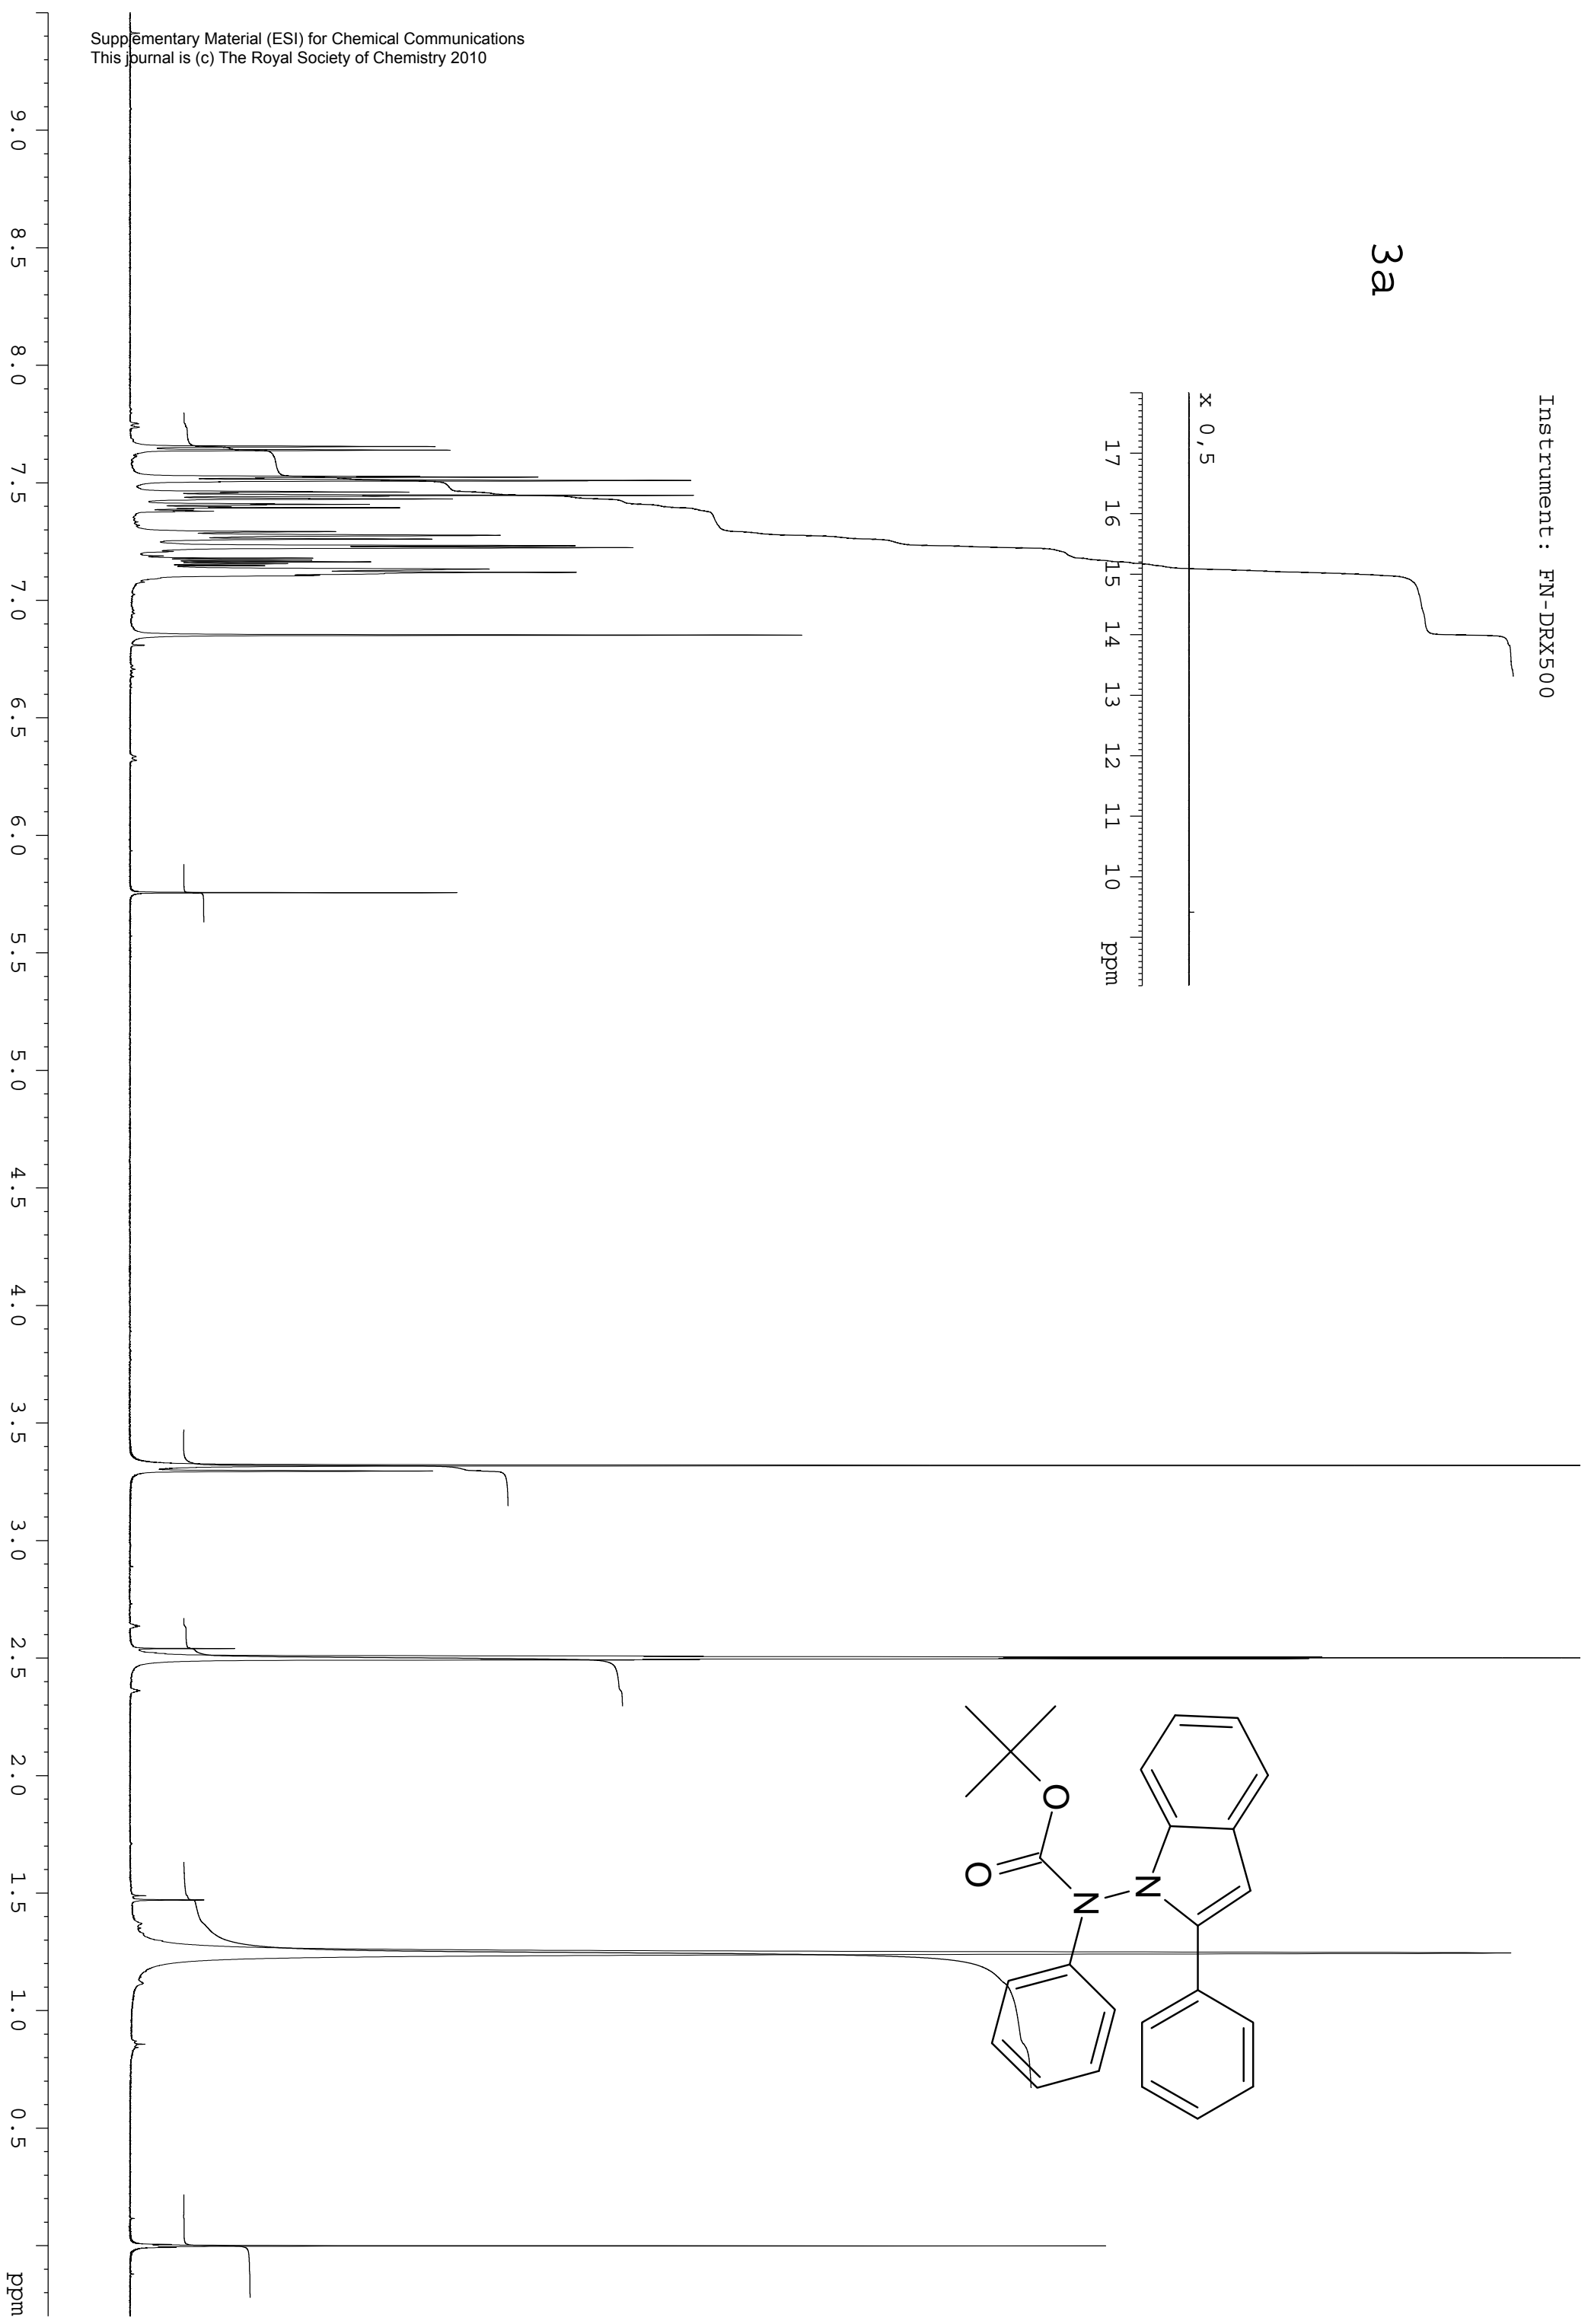

3b

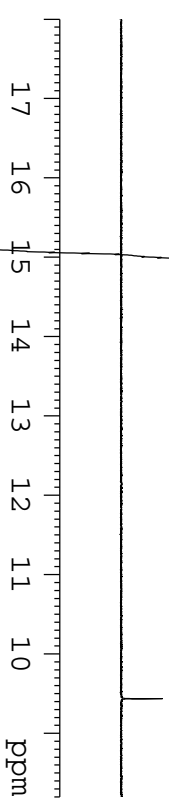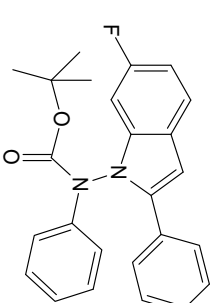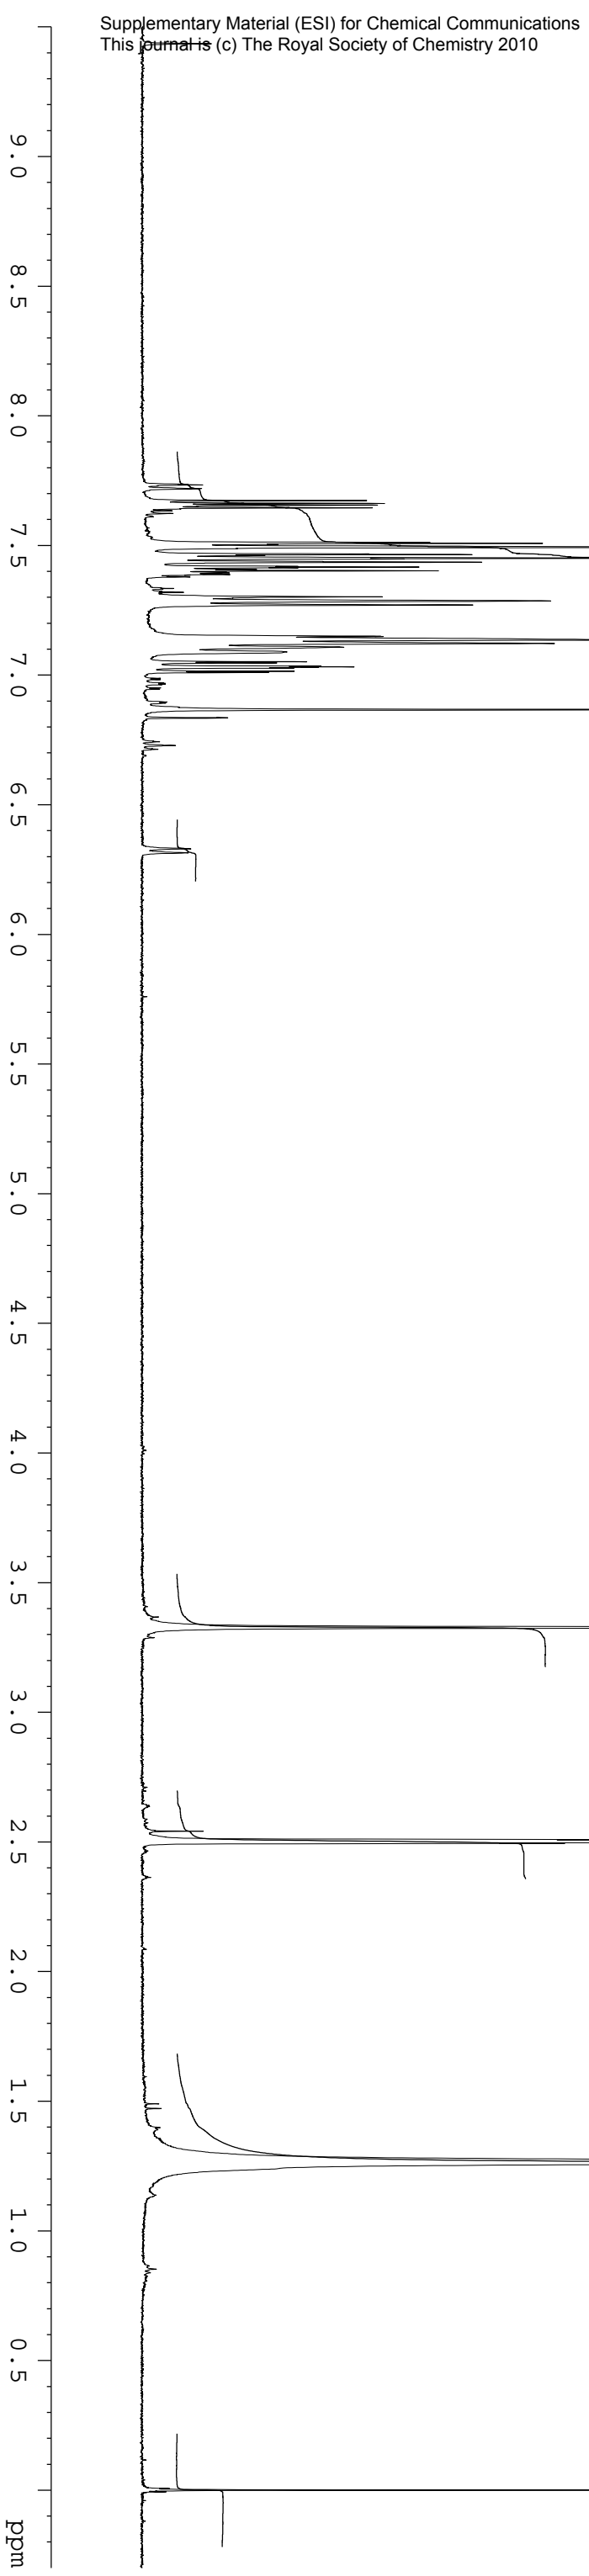

3c

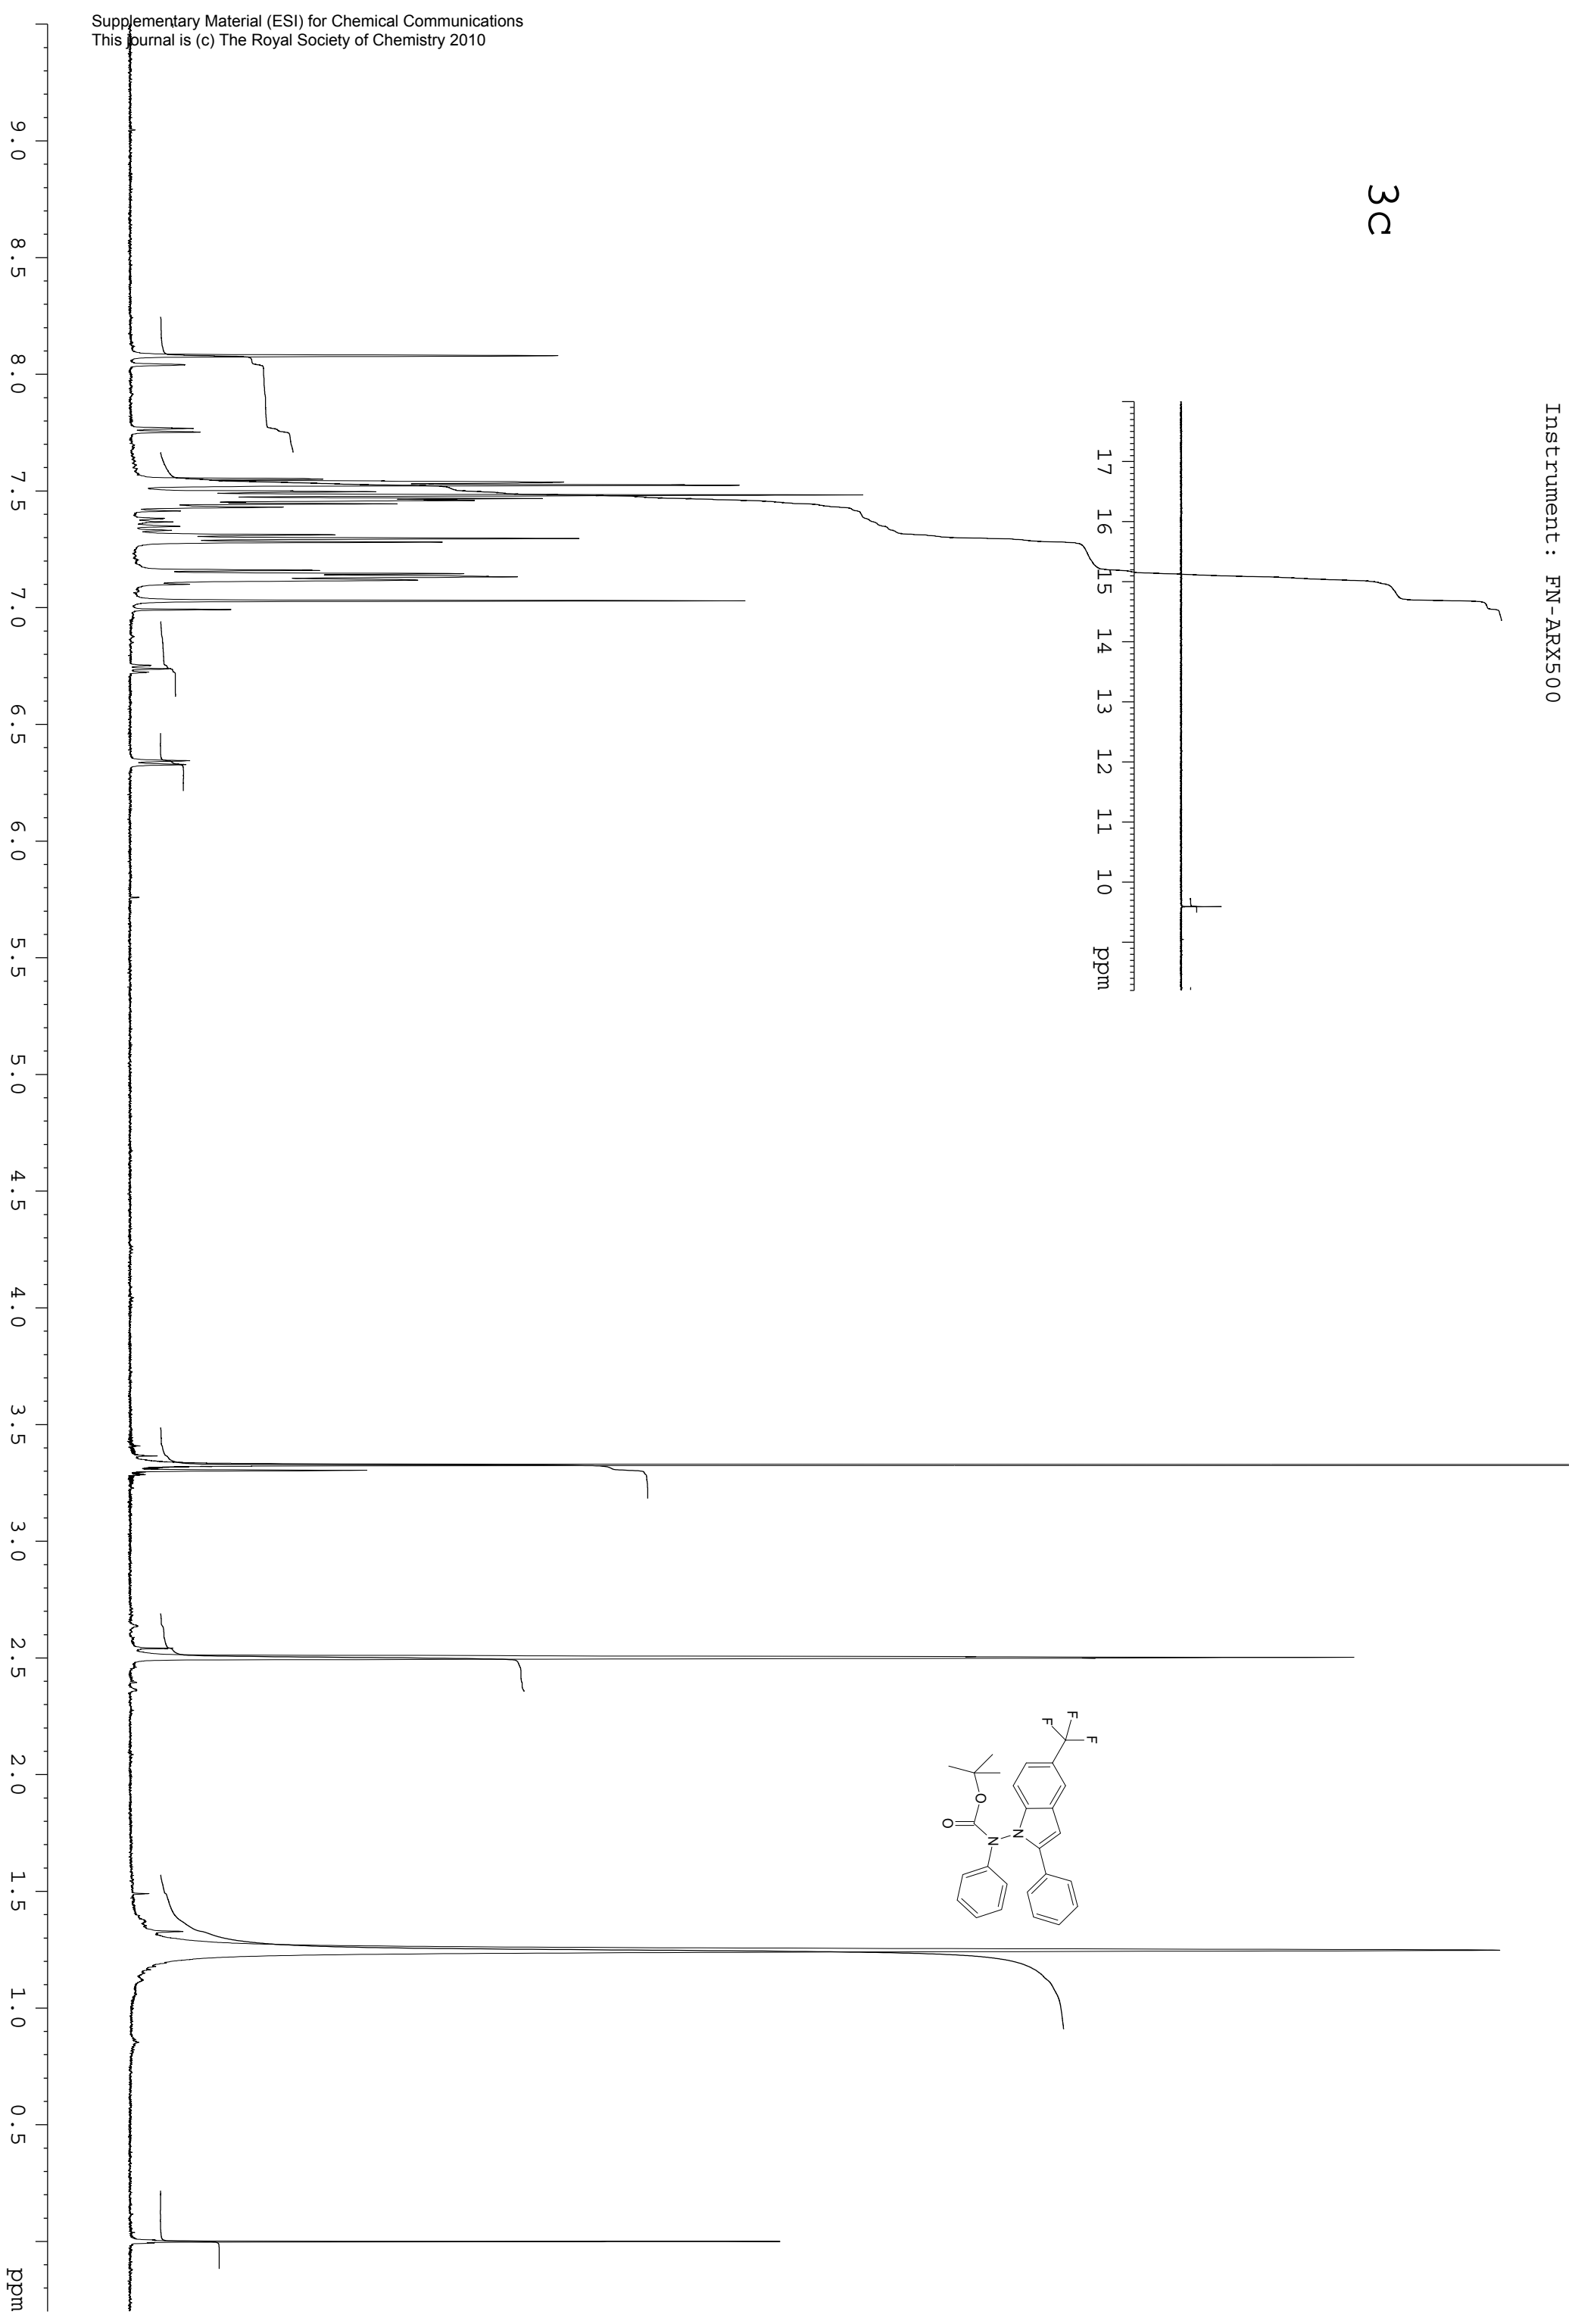

ppm

3d

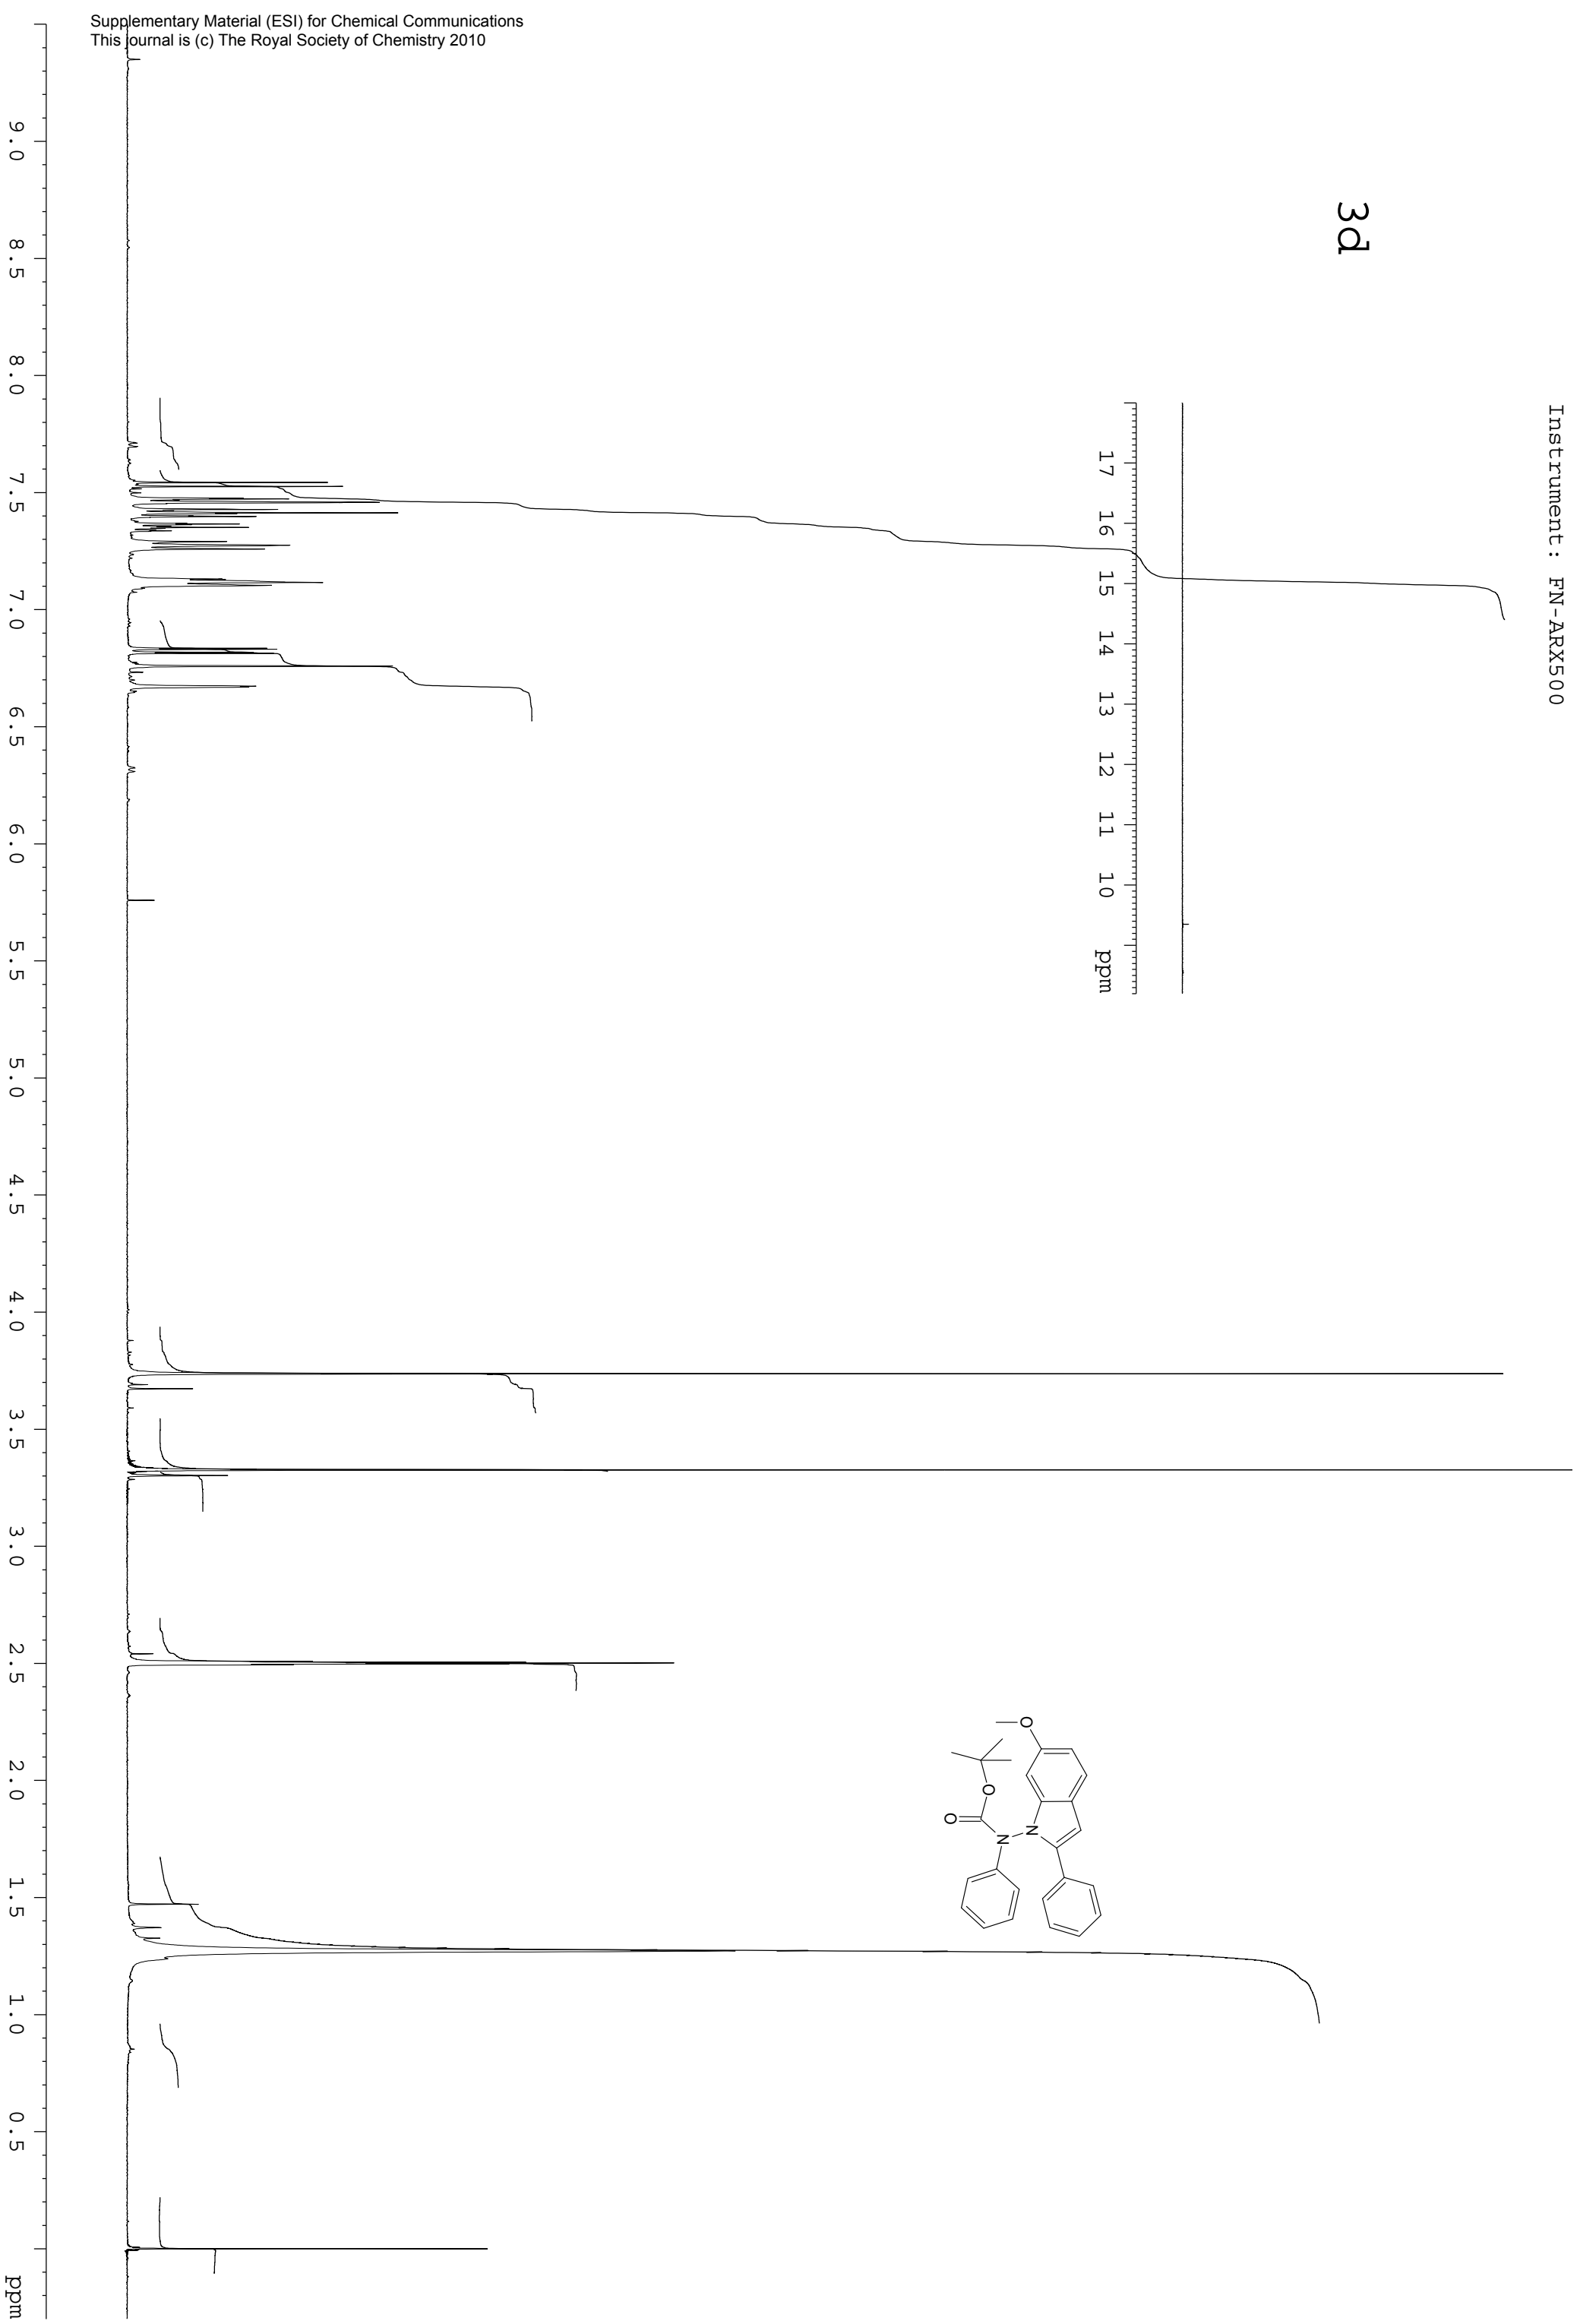

Instrument : FN-DRX400

3e

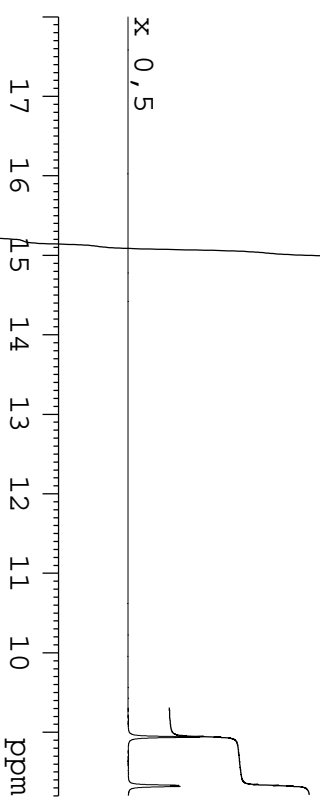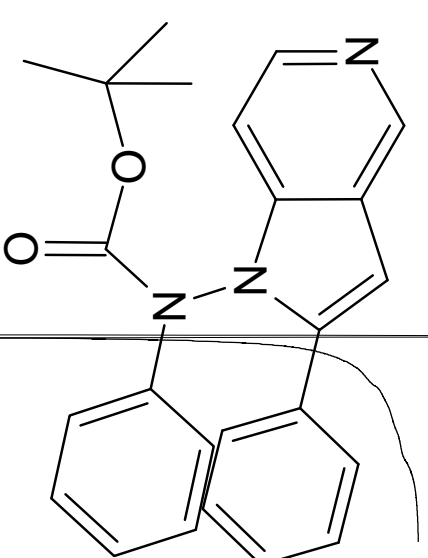

9.0 8.5 8.0 7.5 7.0 6.5 6.0 5.5 5.0 4.5 4.0 3.5 3.0 2.5 2.0 1.5 1.0 0.5 ppm

3f

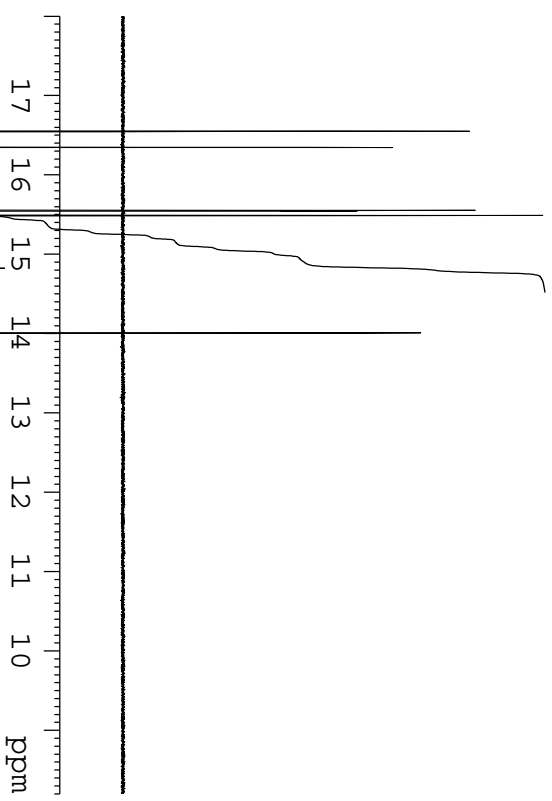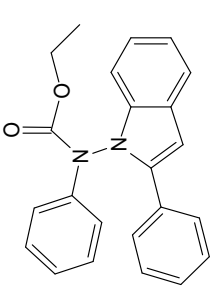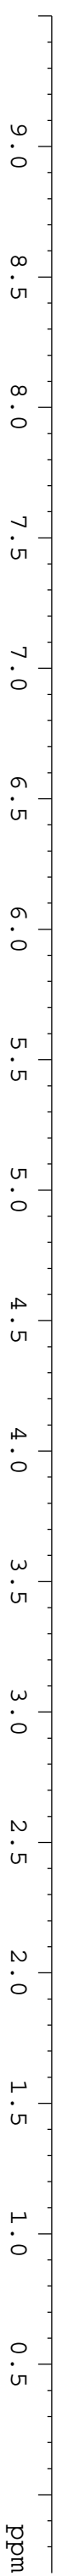



3g

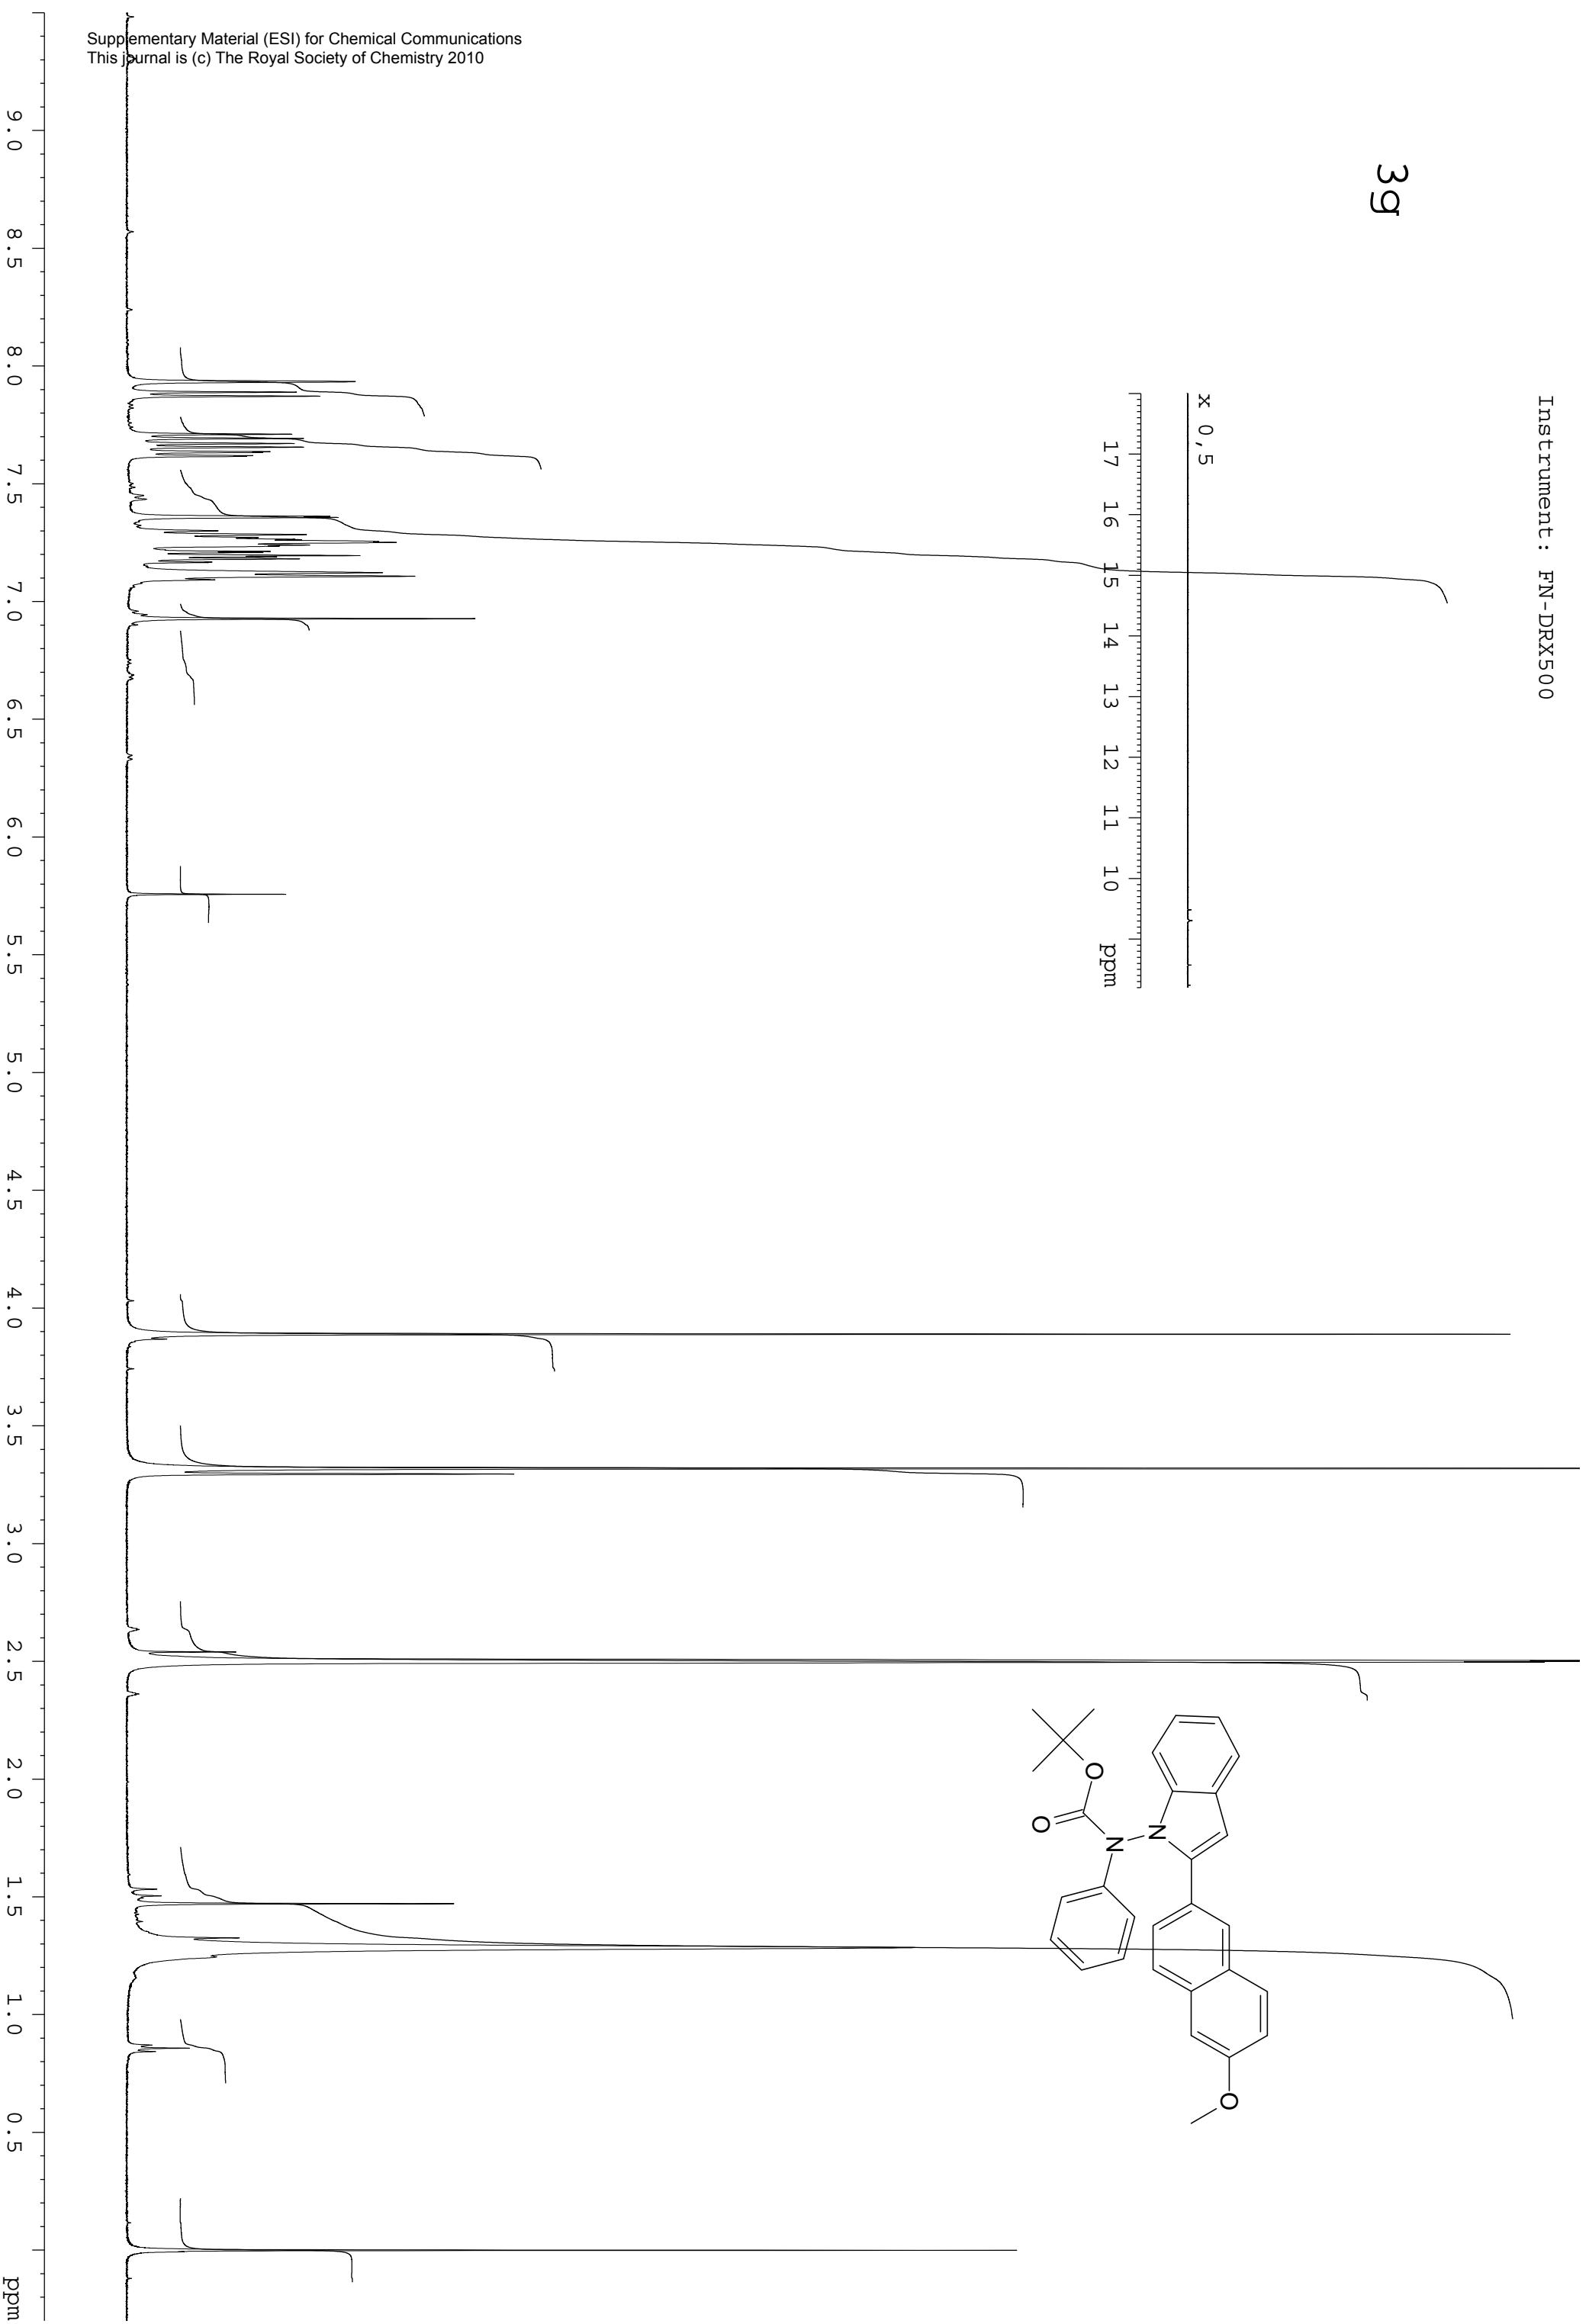

3h

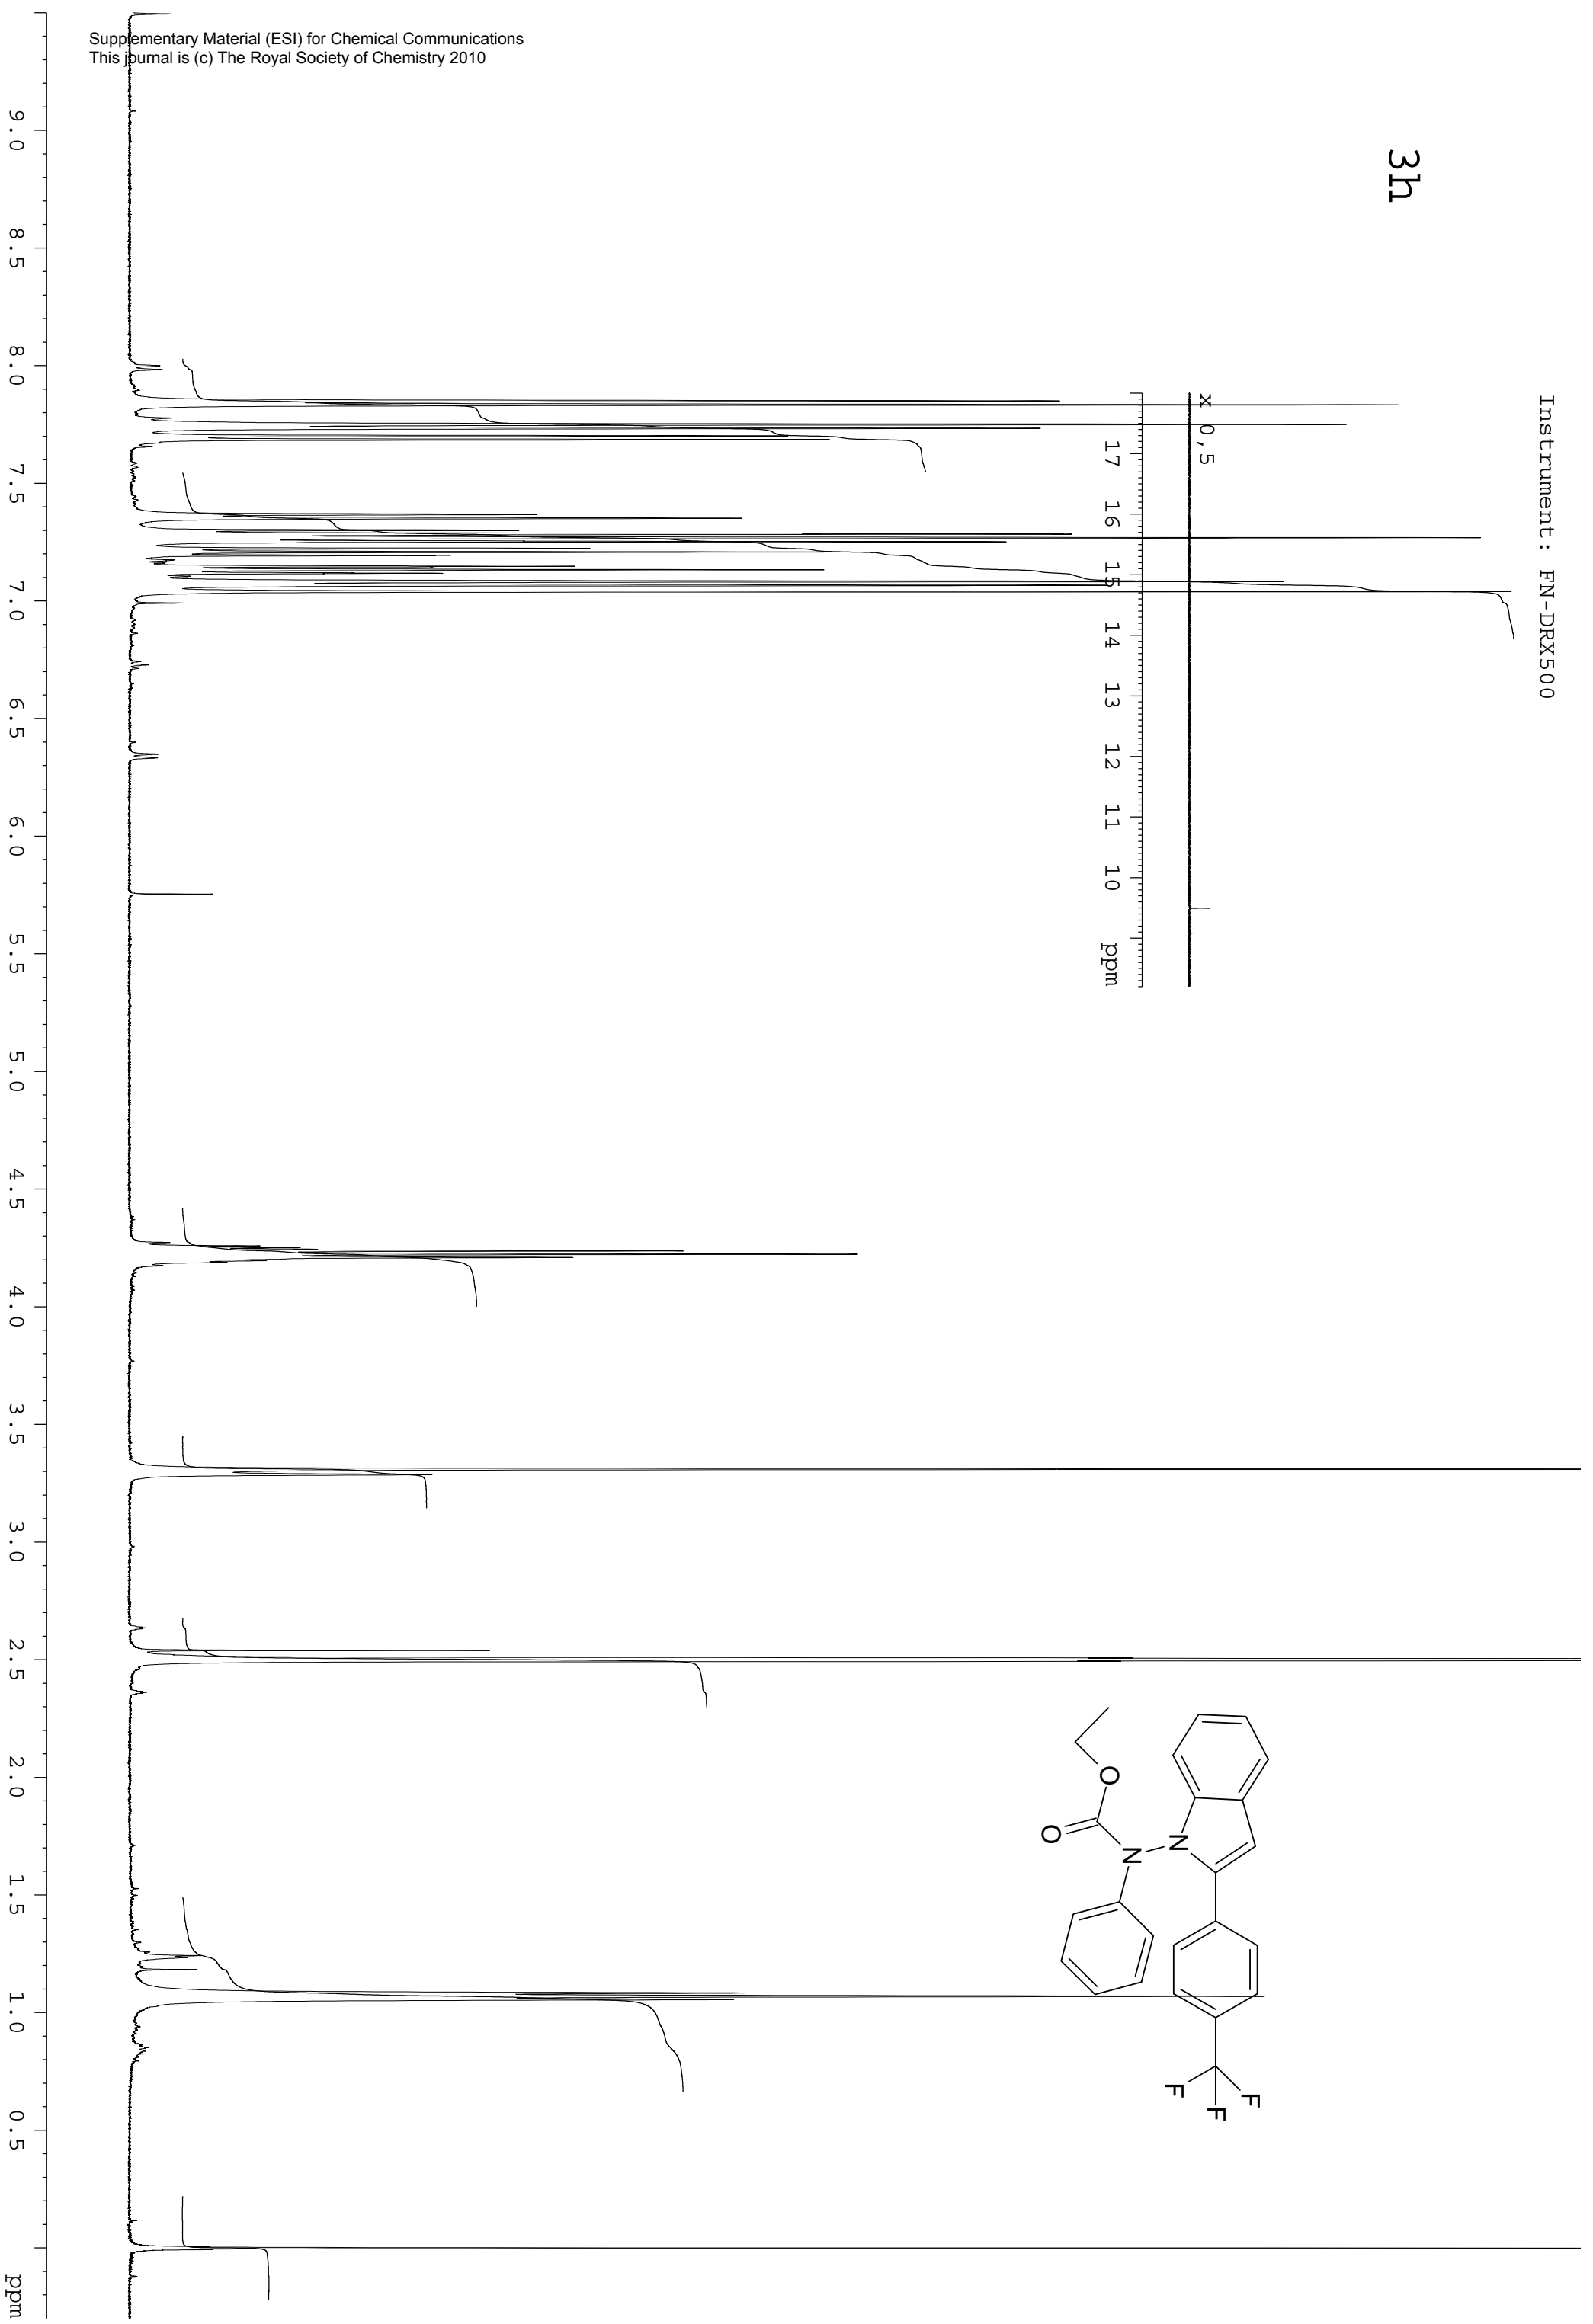

31

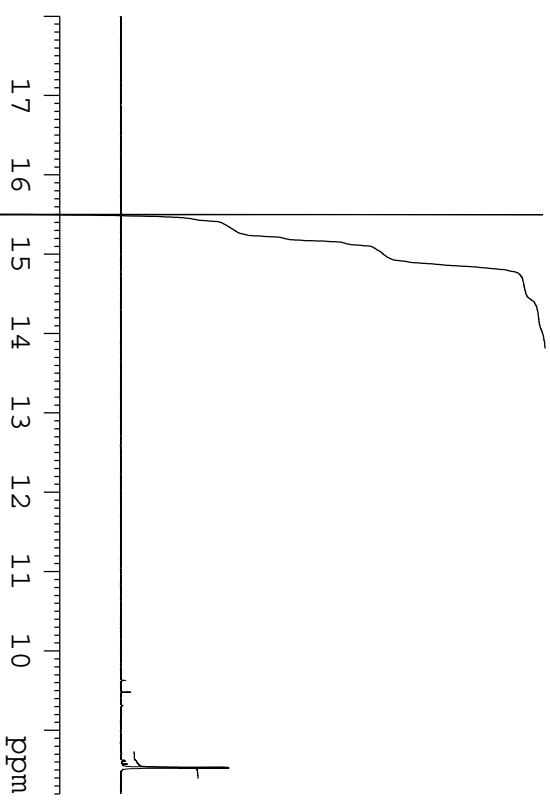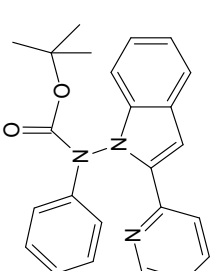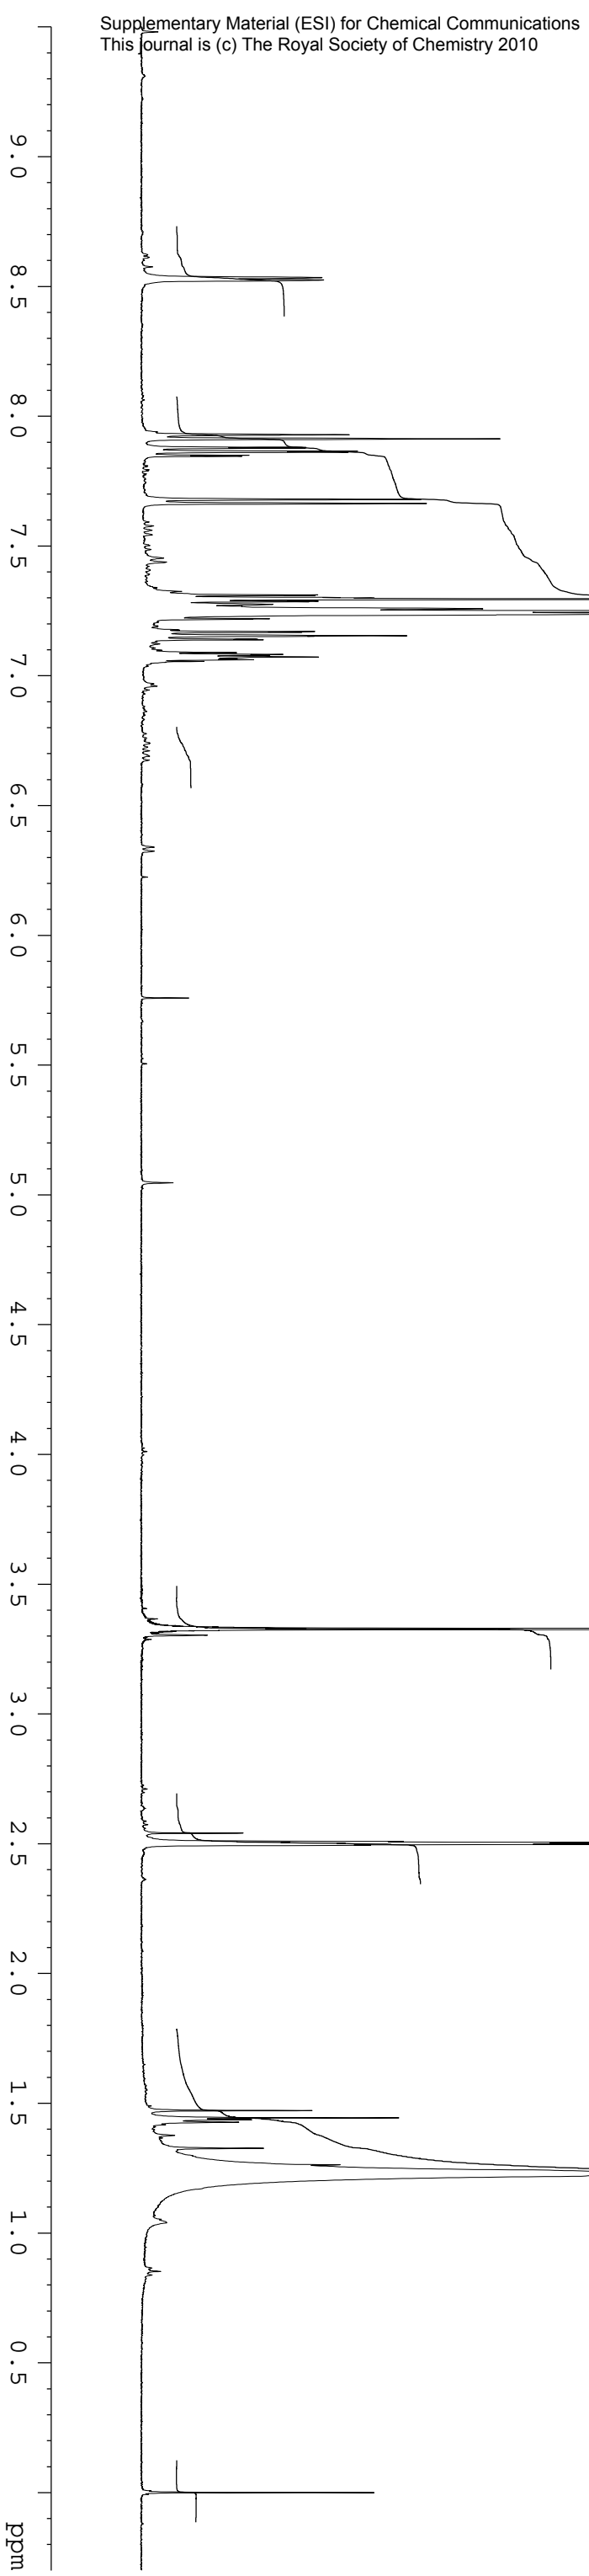

3j

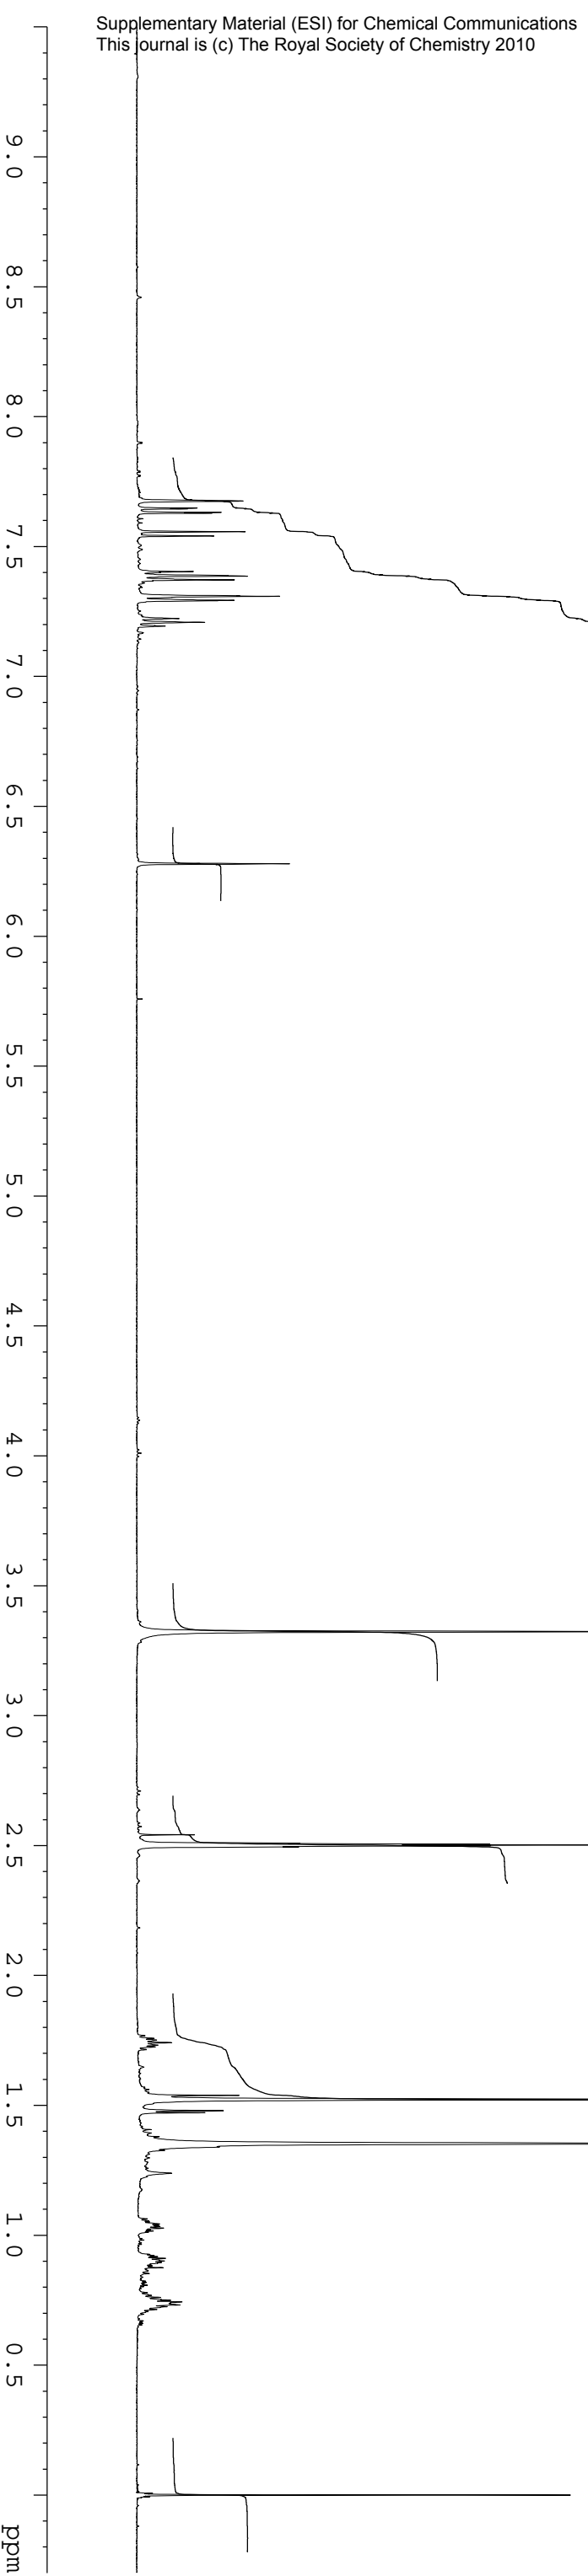

3K

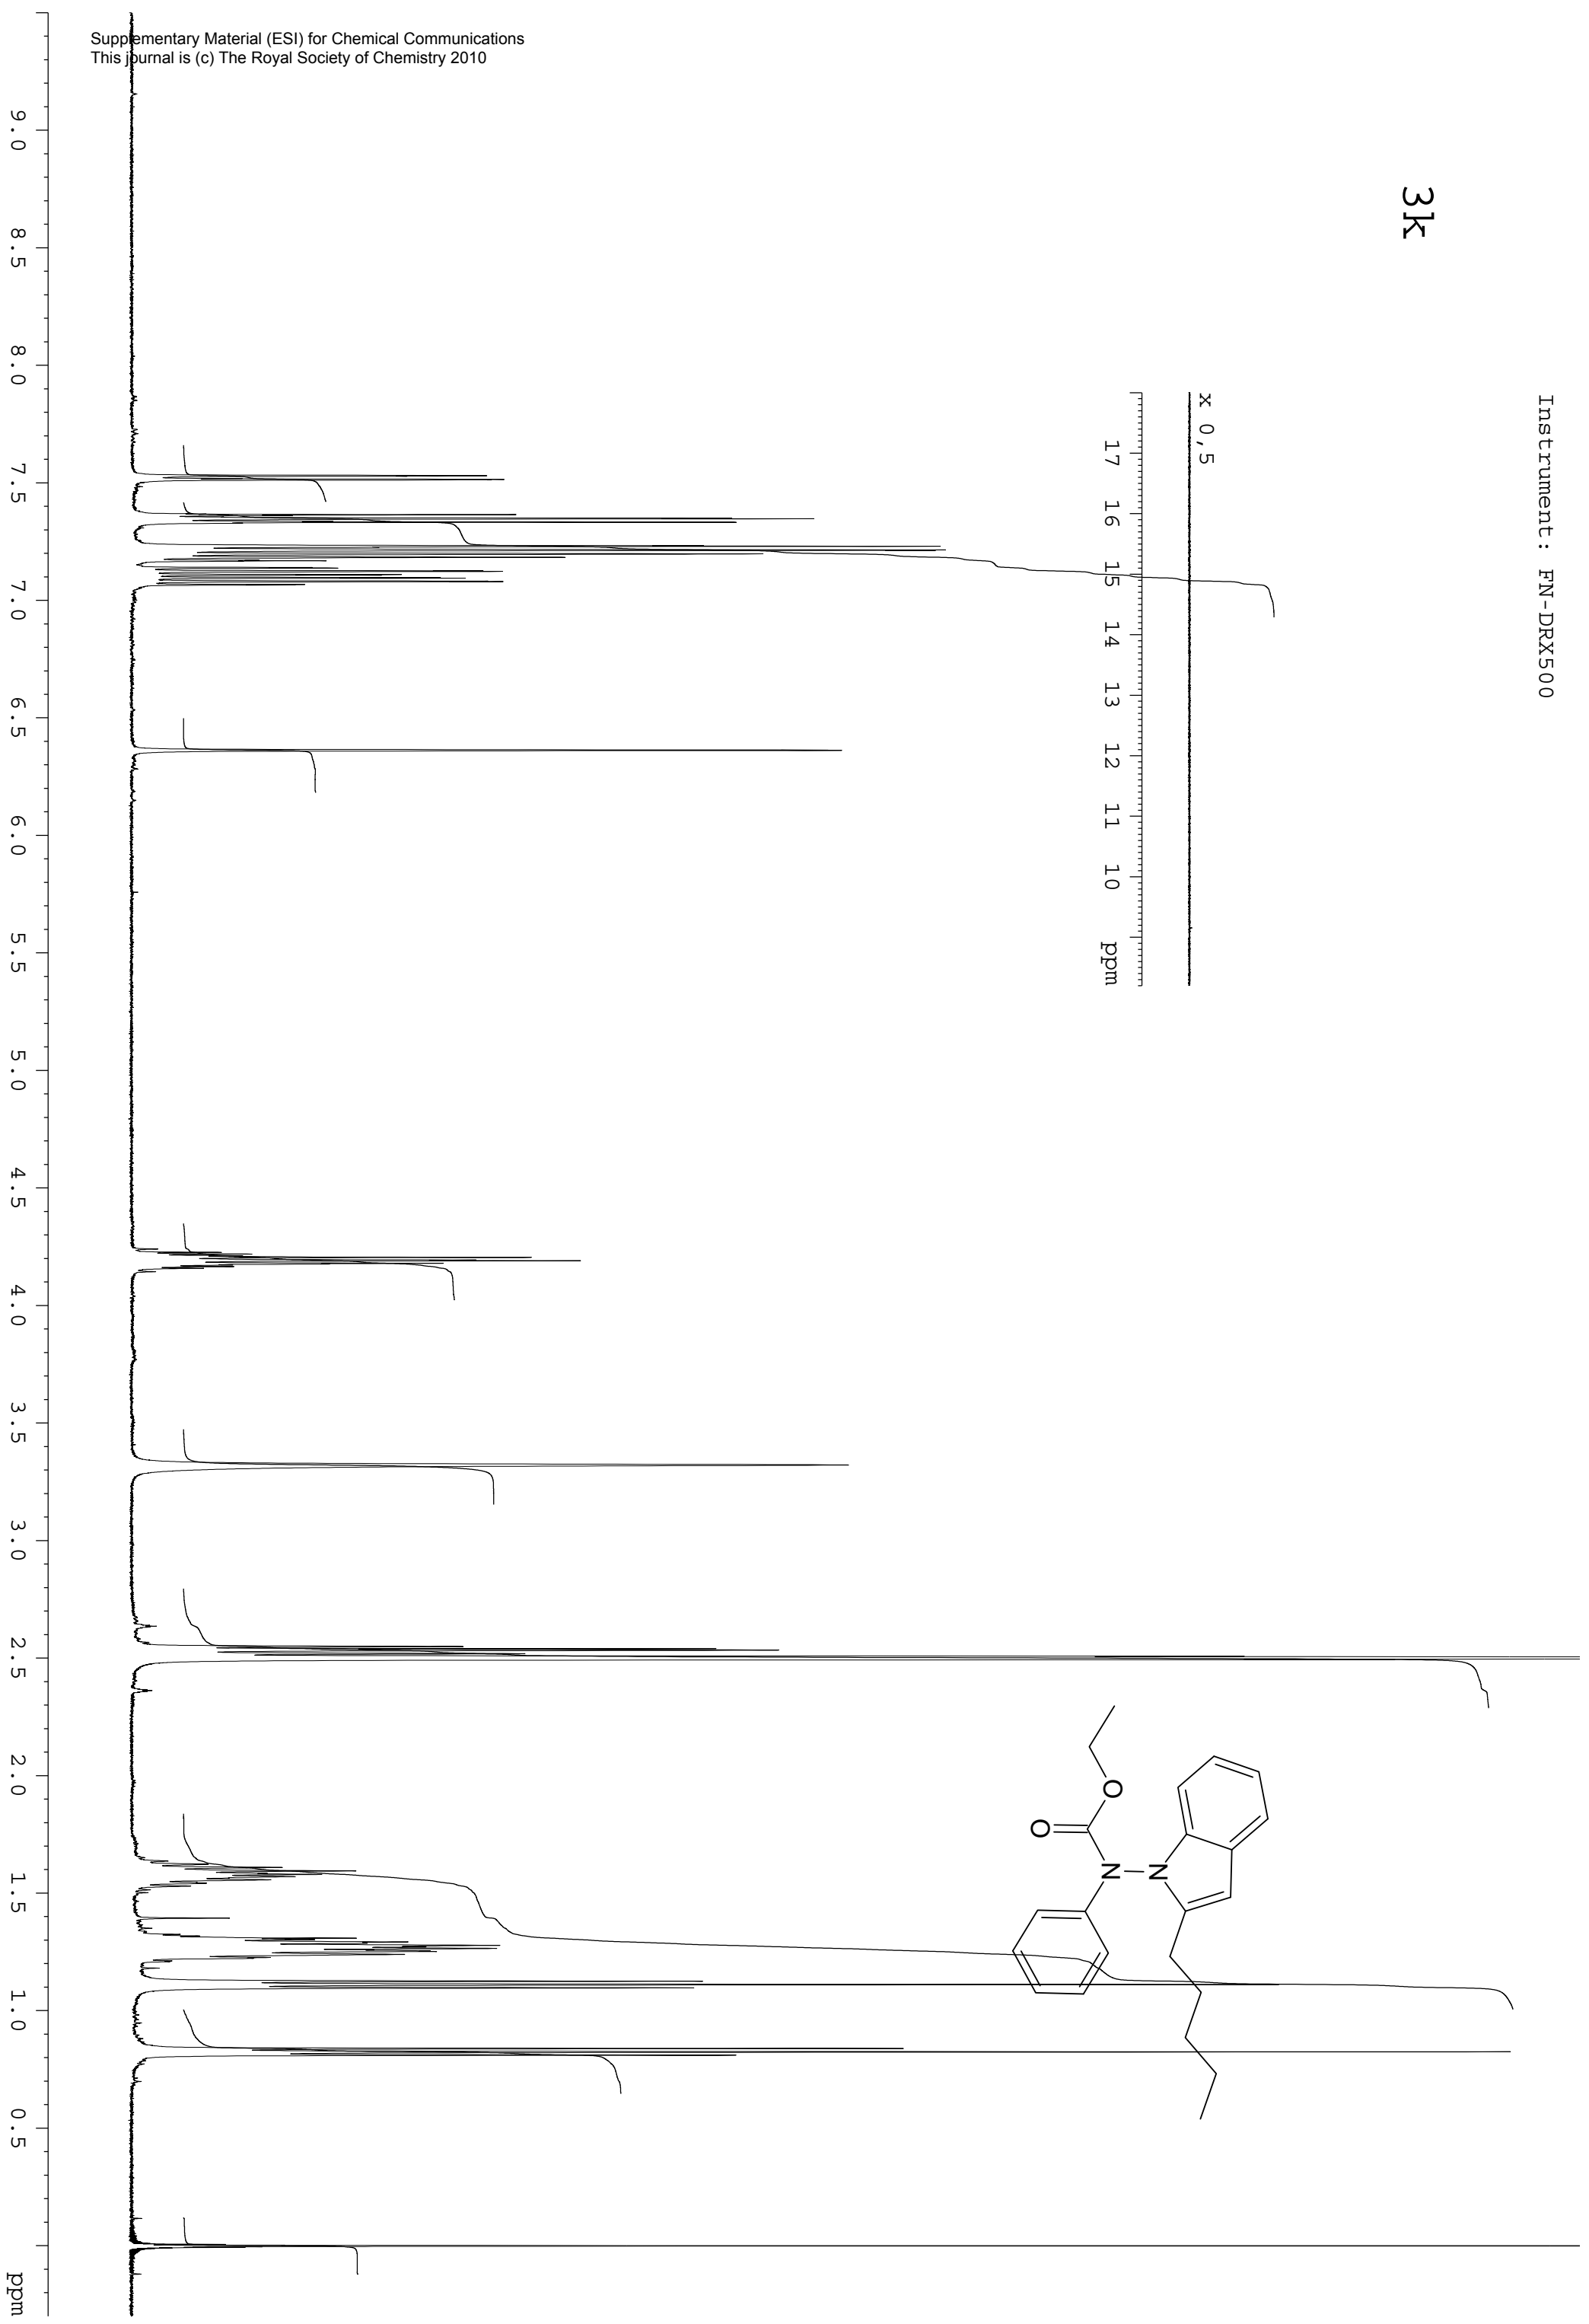

31

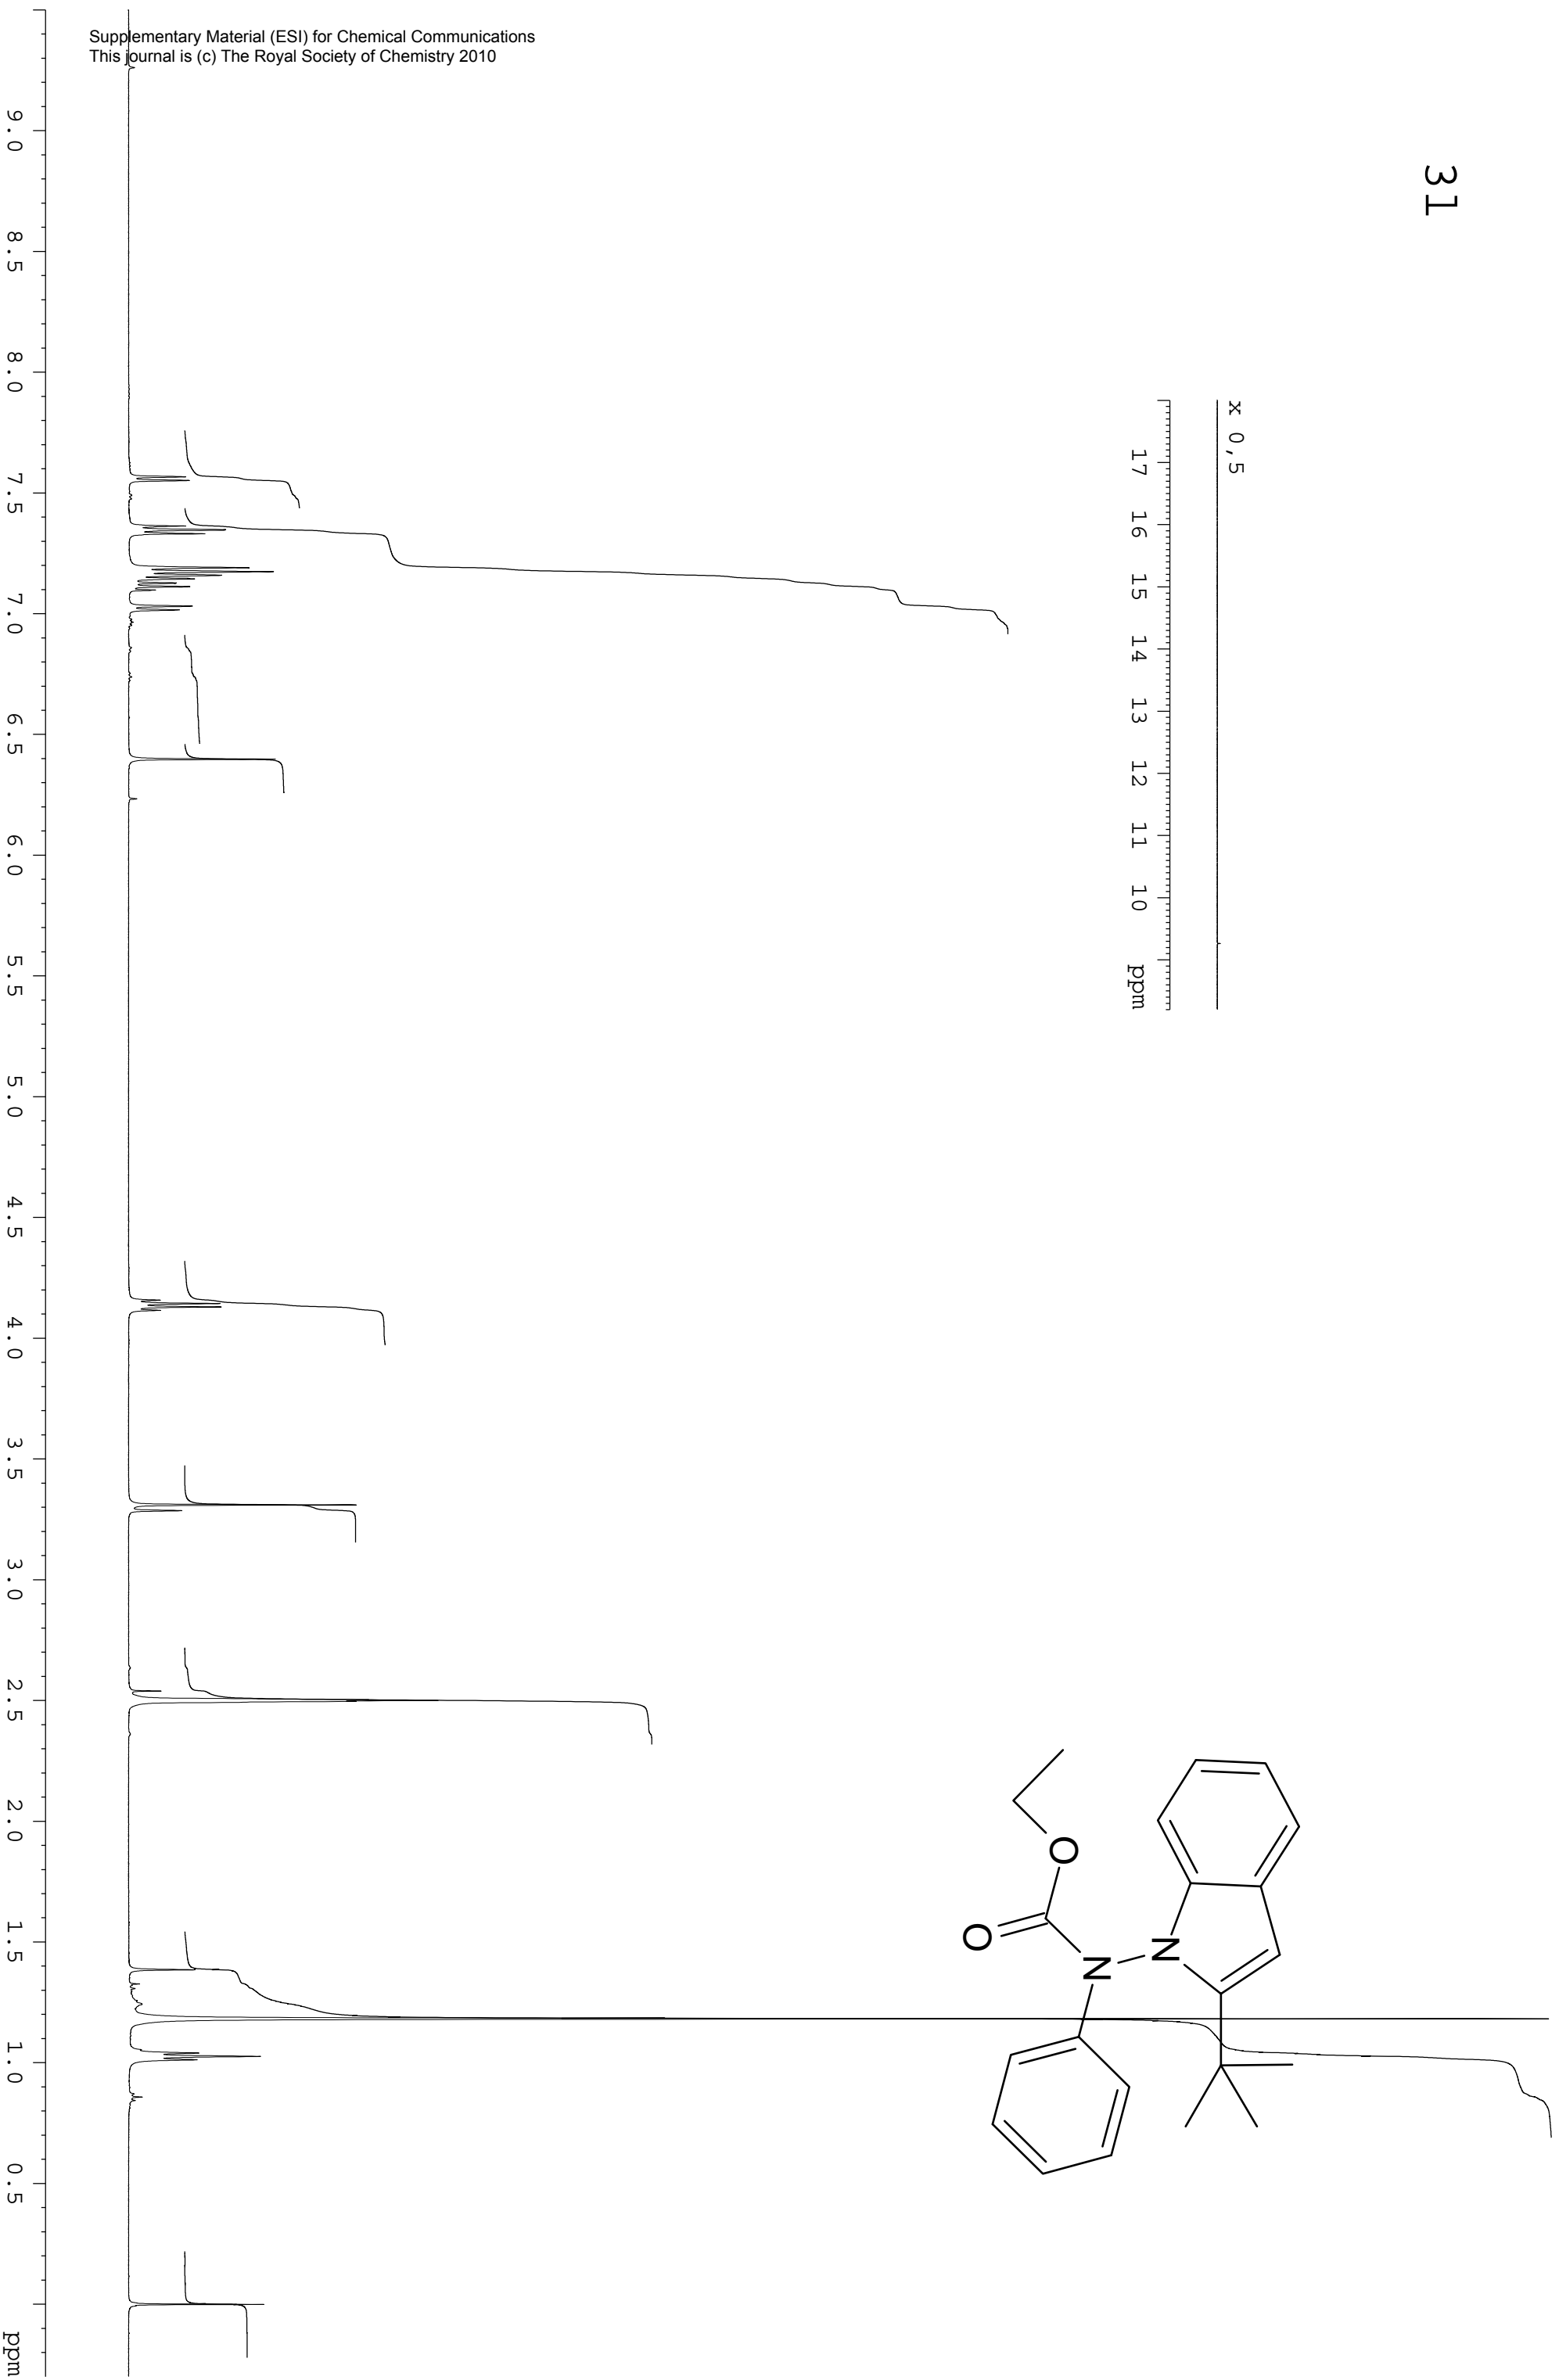

3m

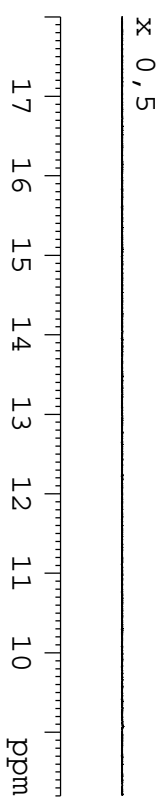

No structure found

Strukturvorschlag MedChem

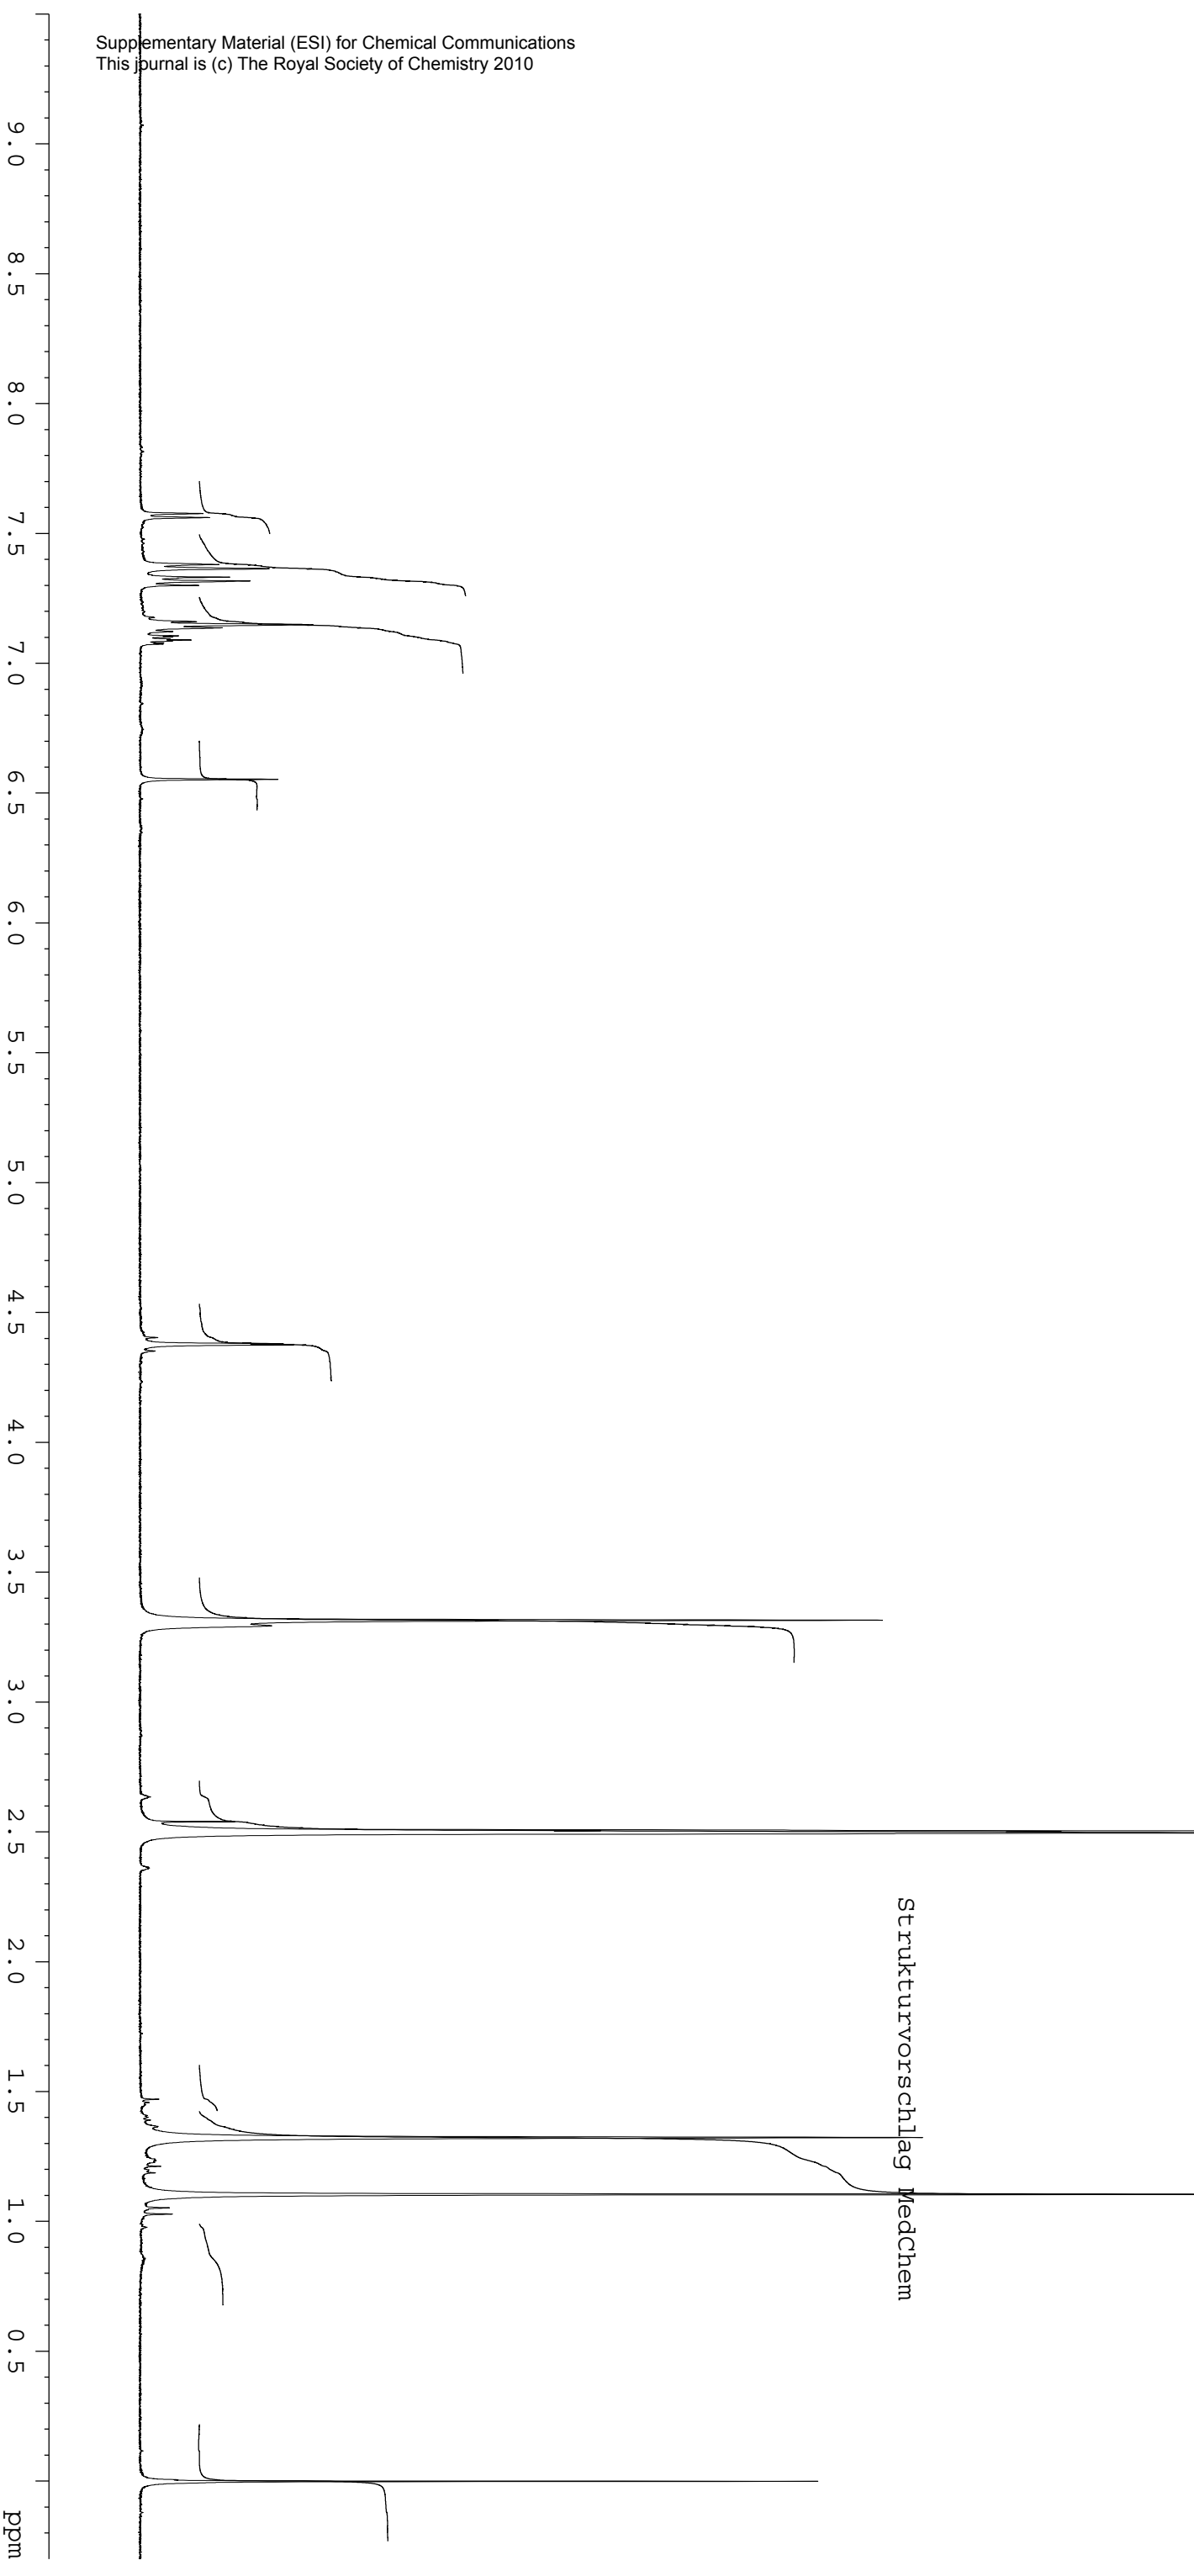

311

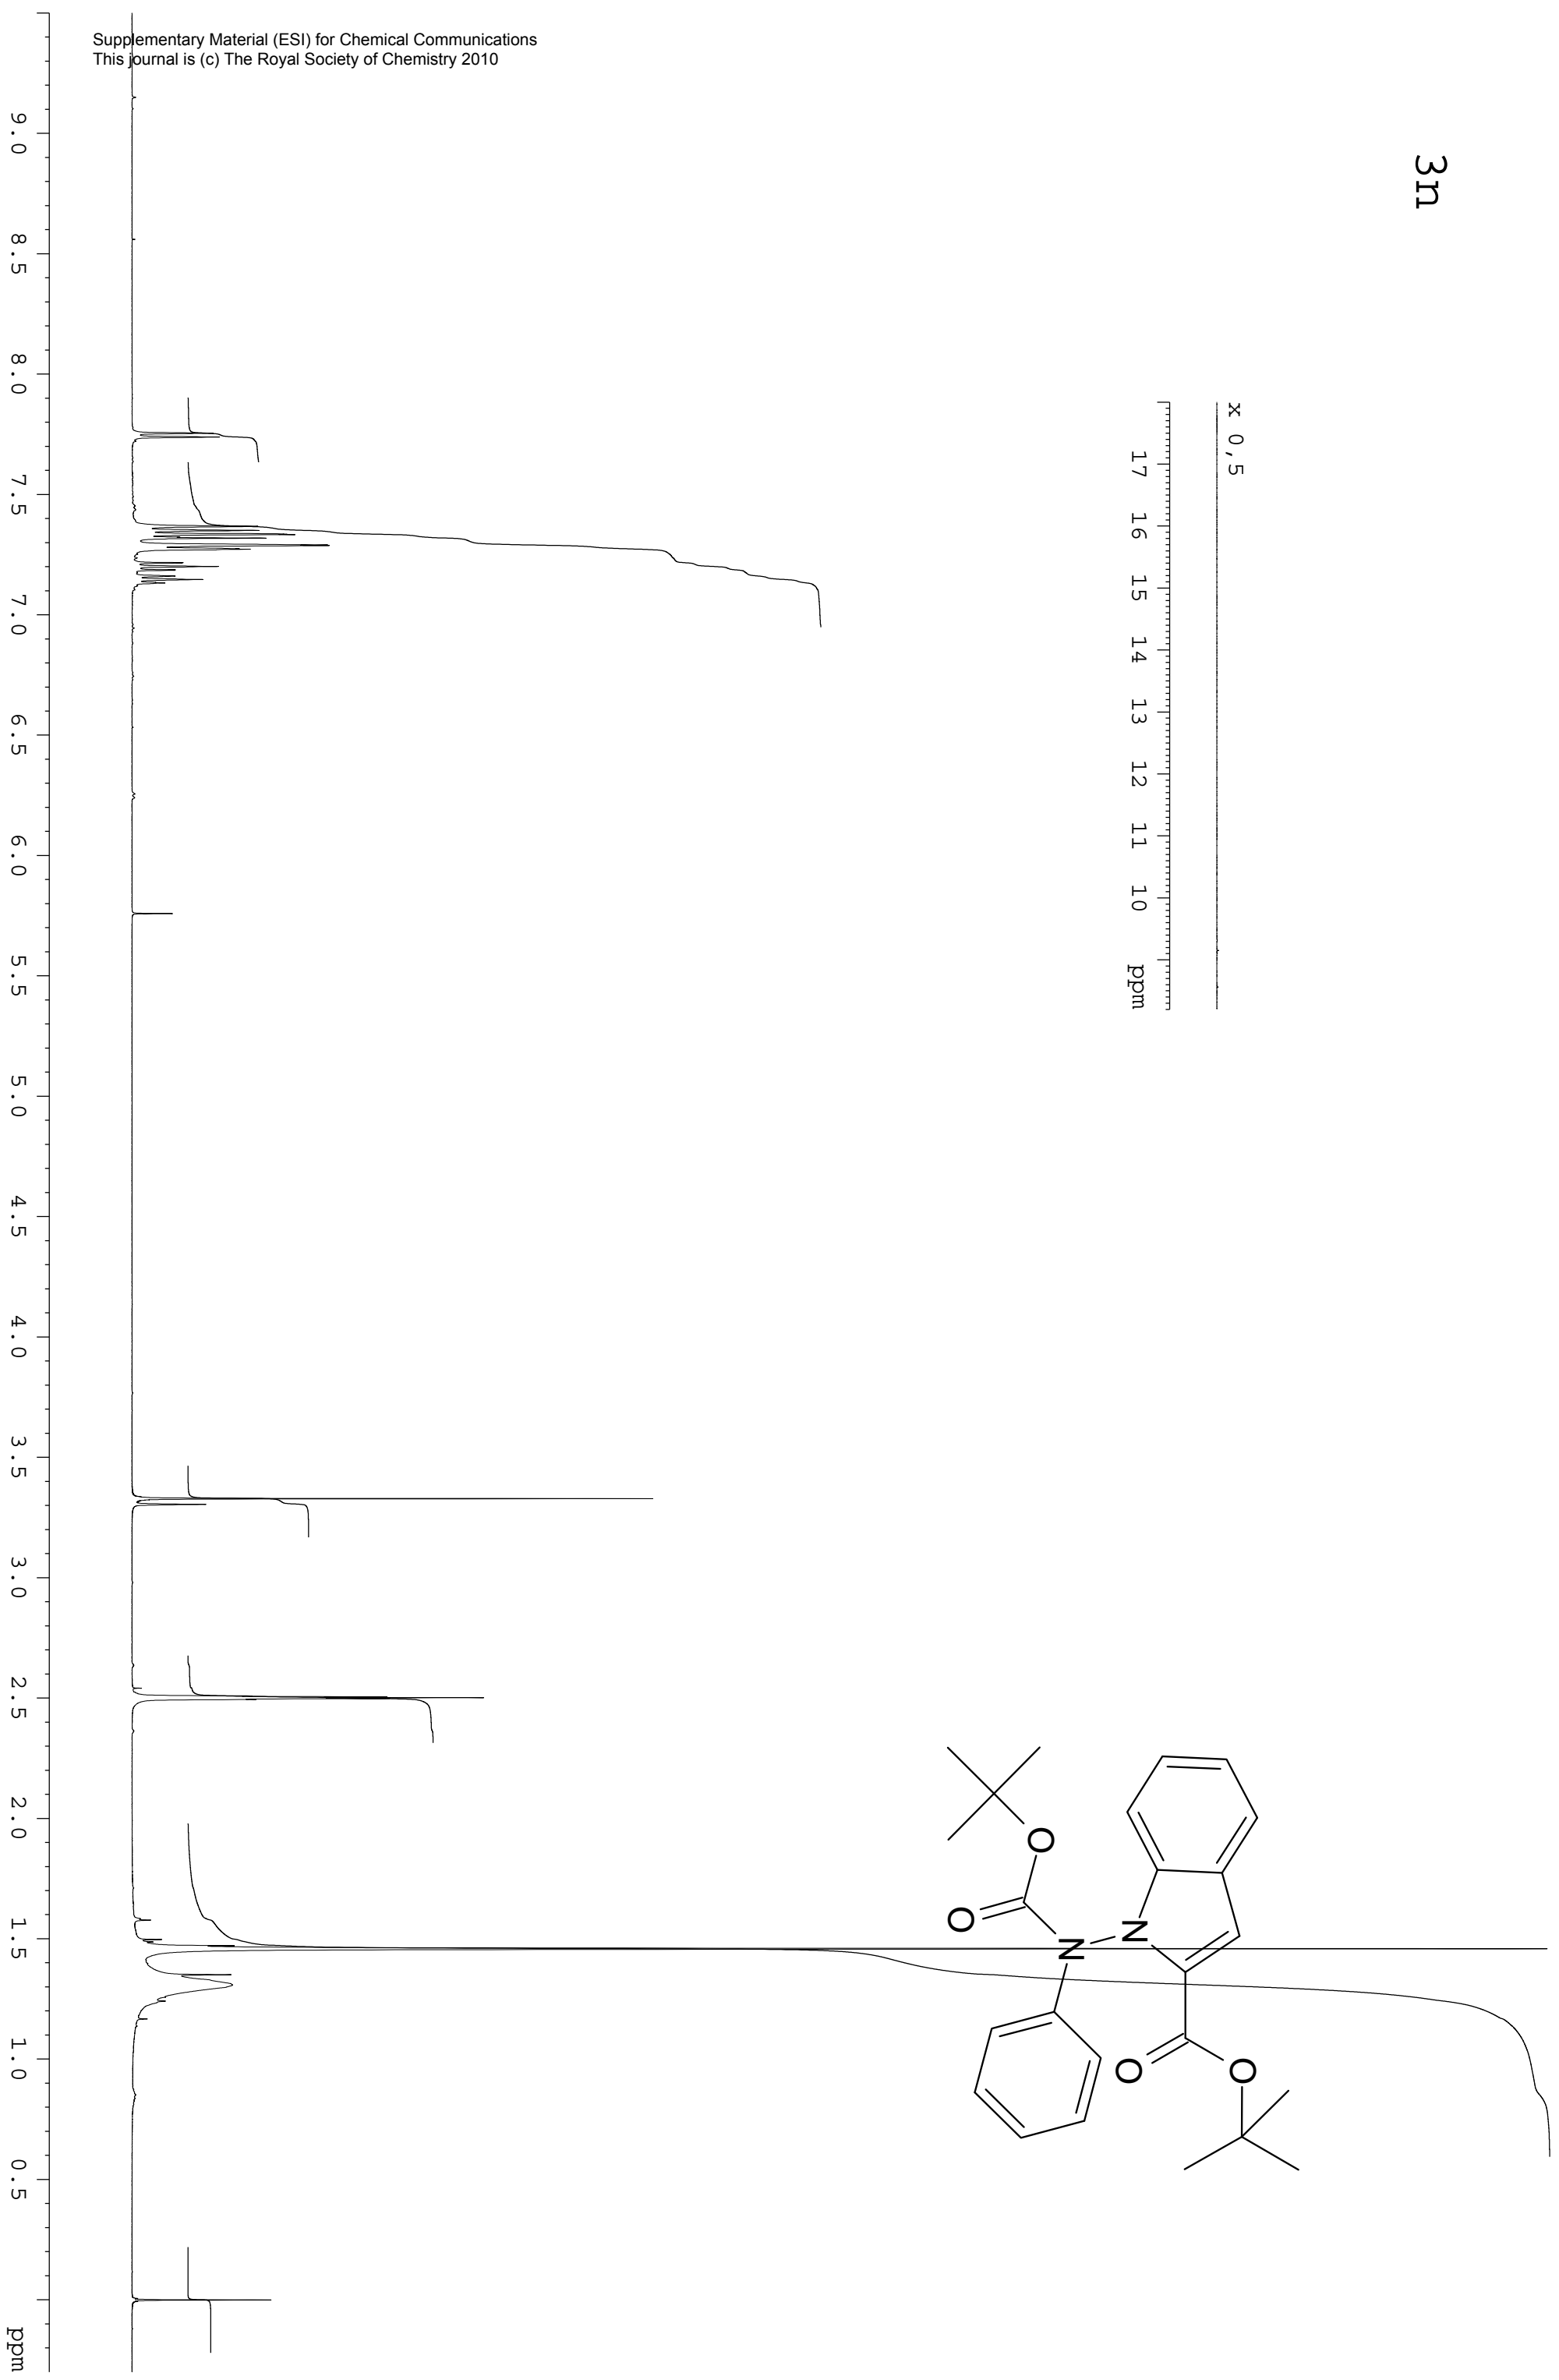

ppm



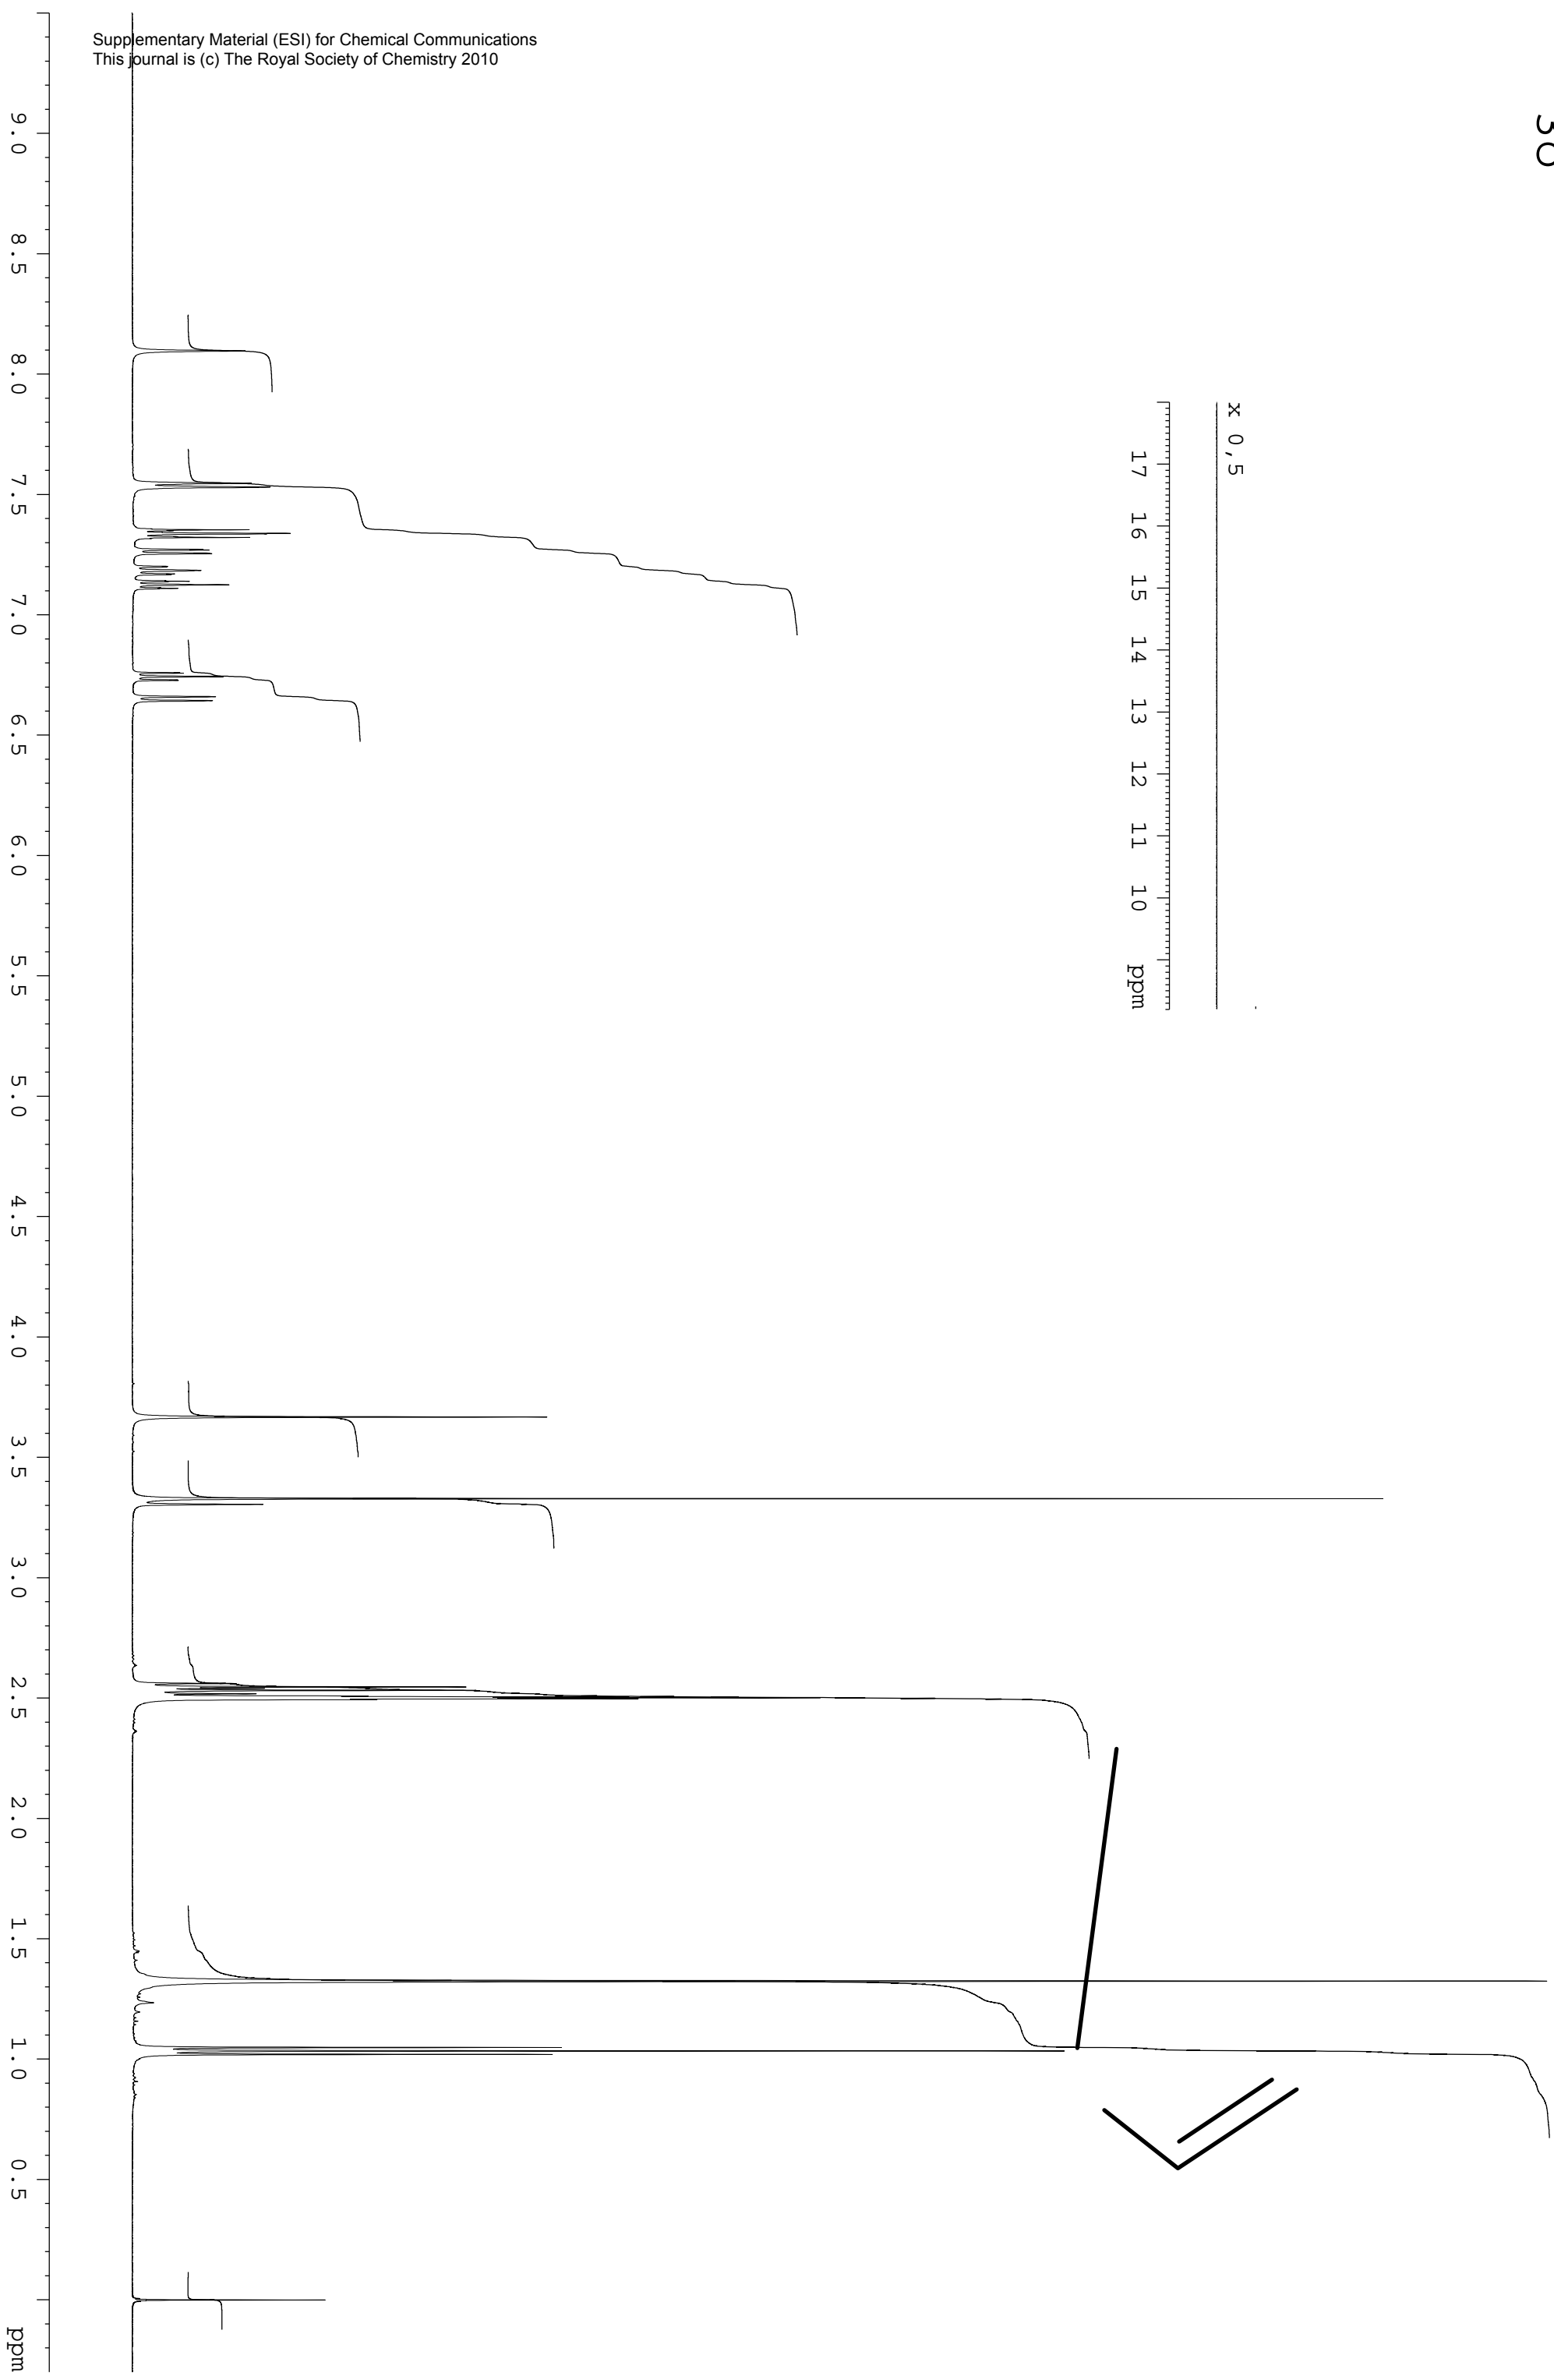

3p

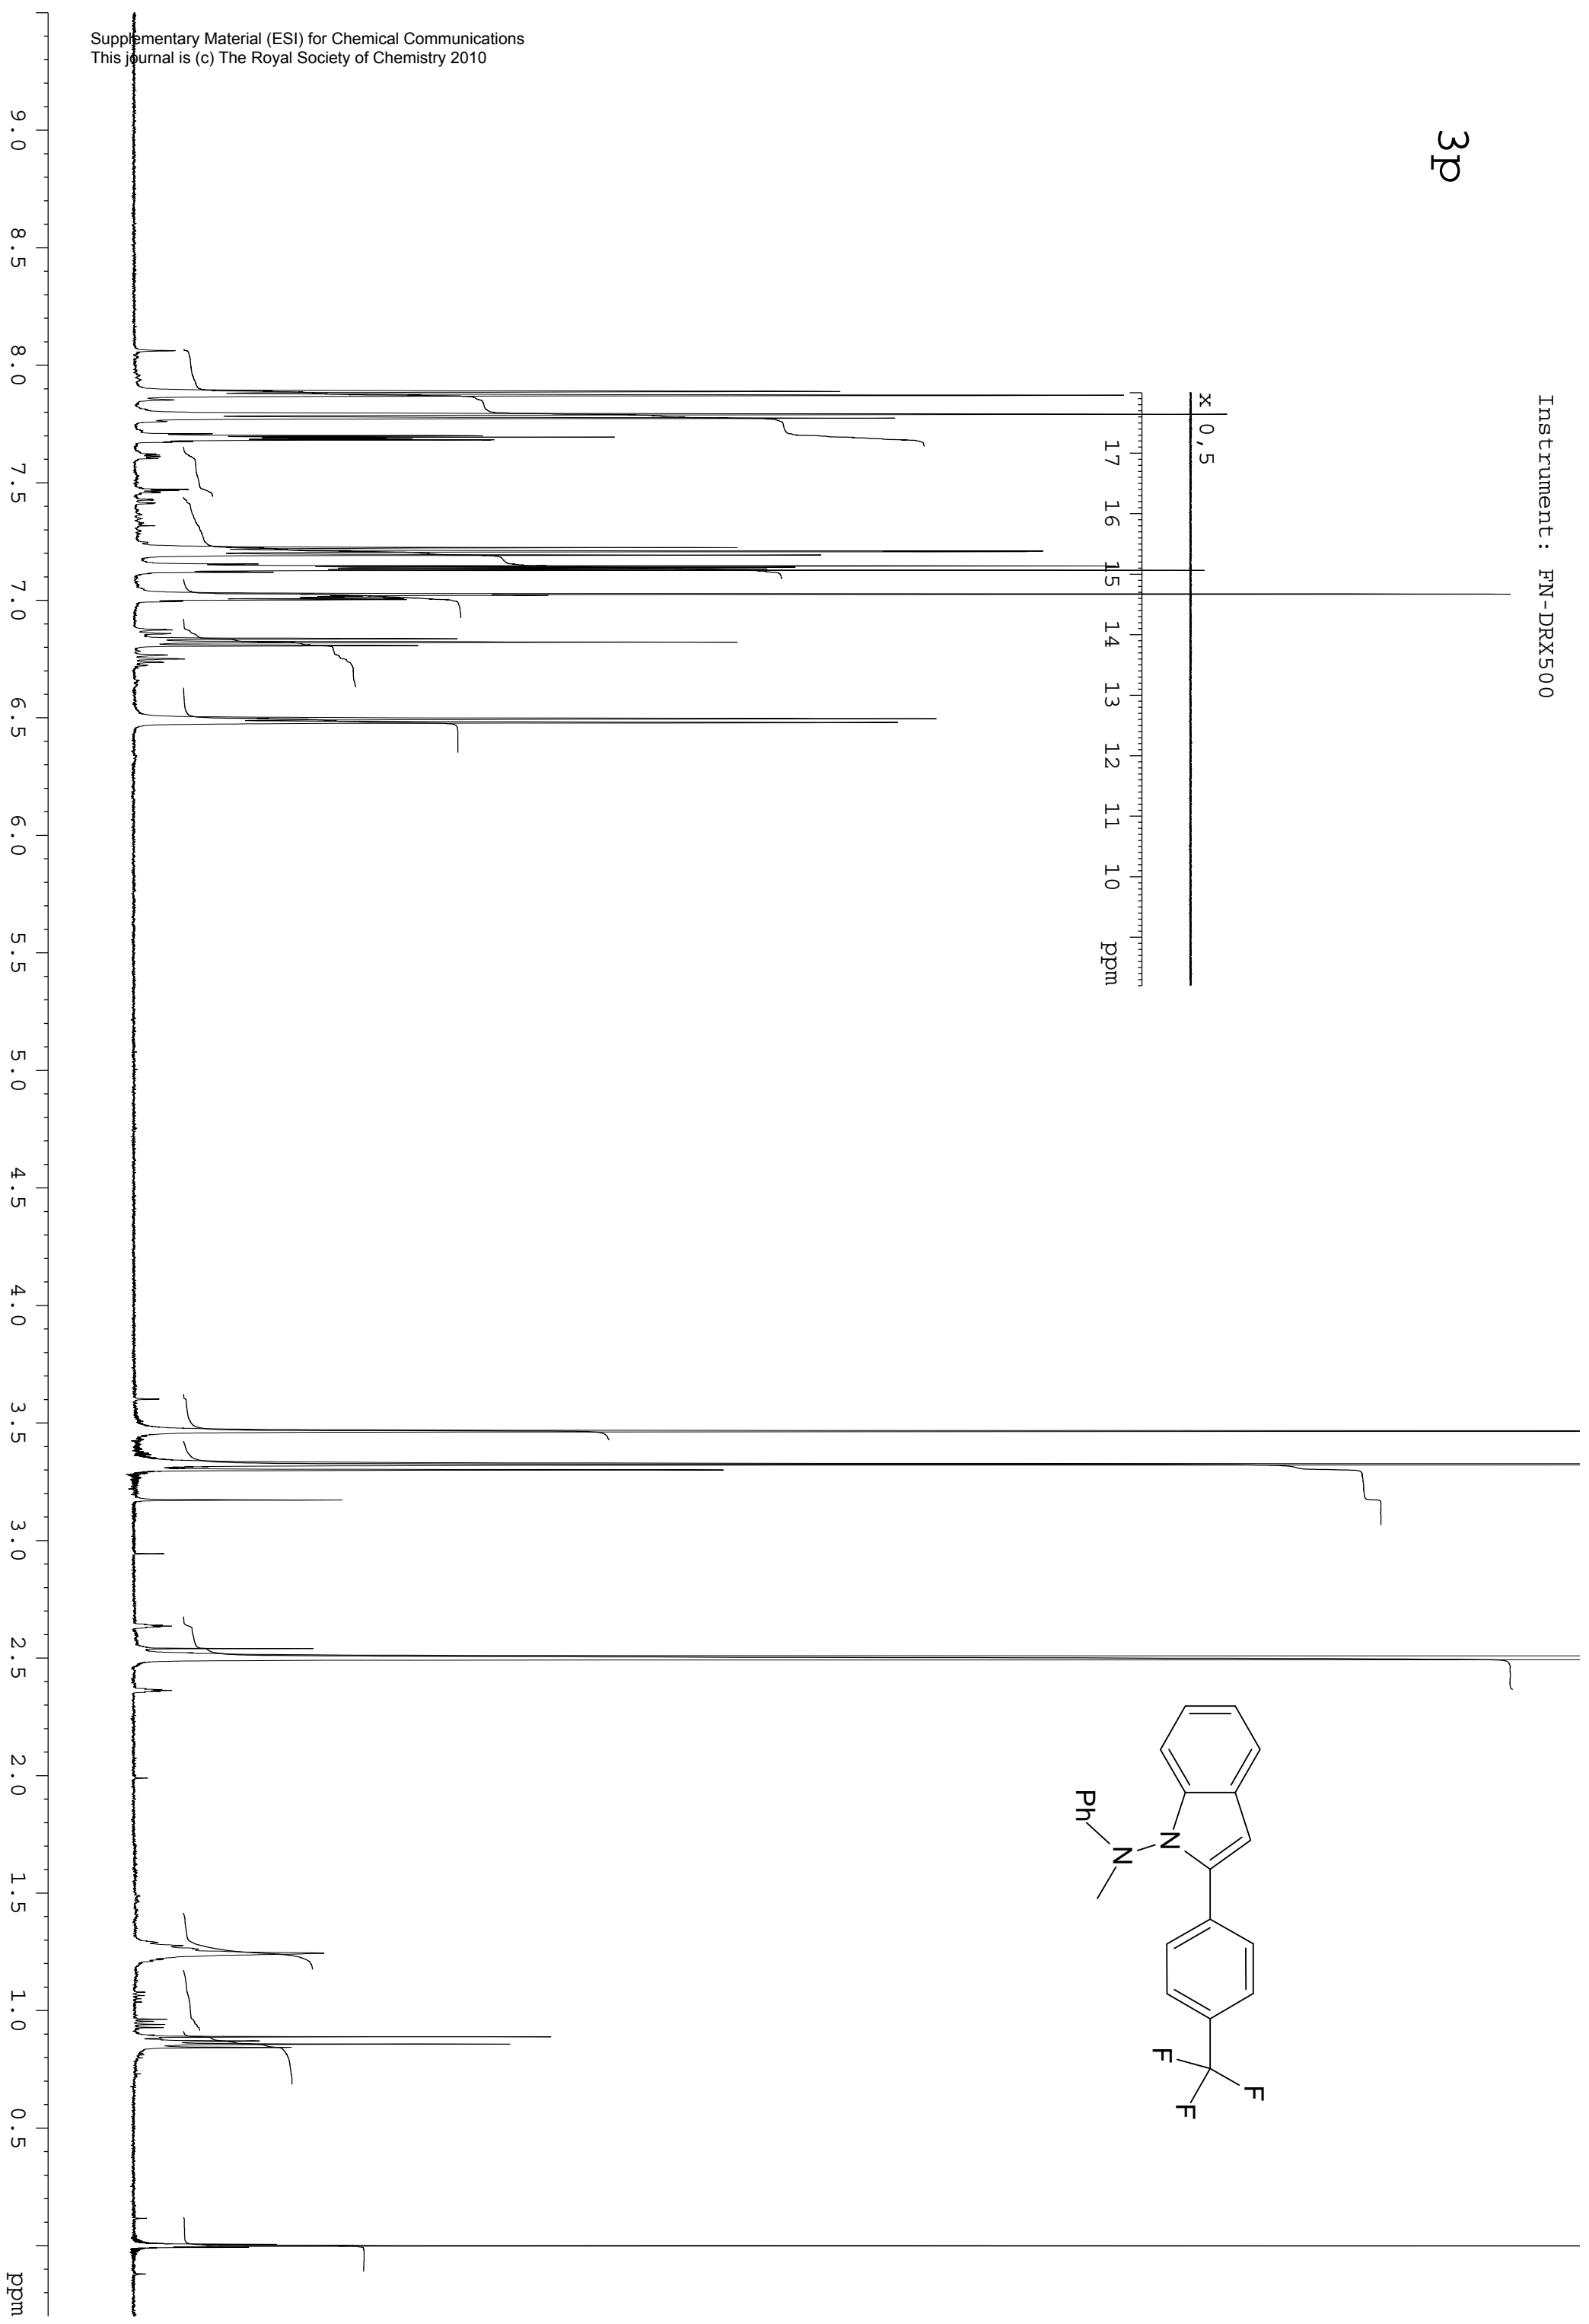

ppm

3q

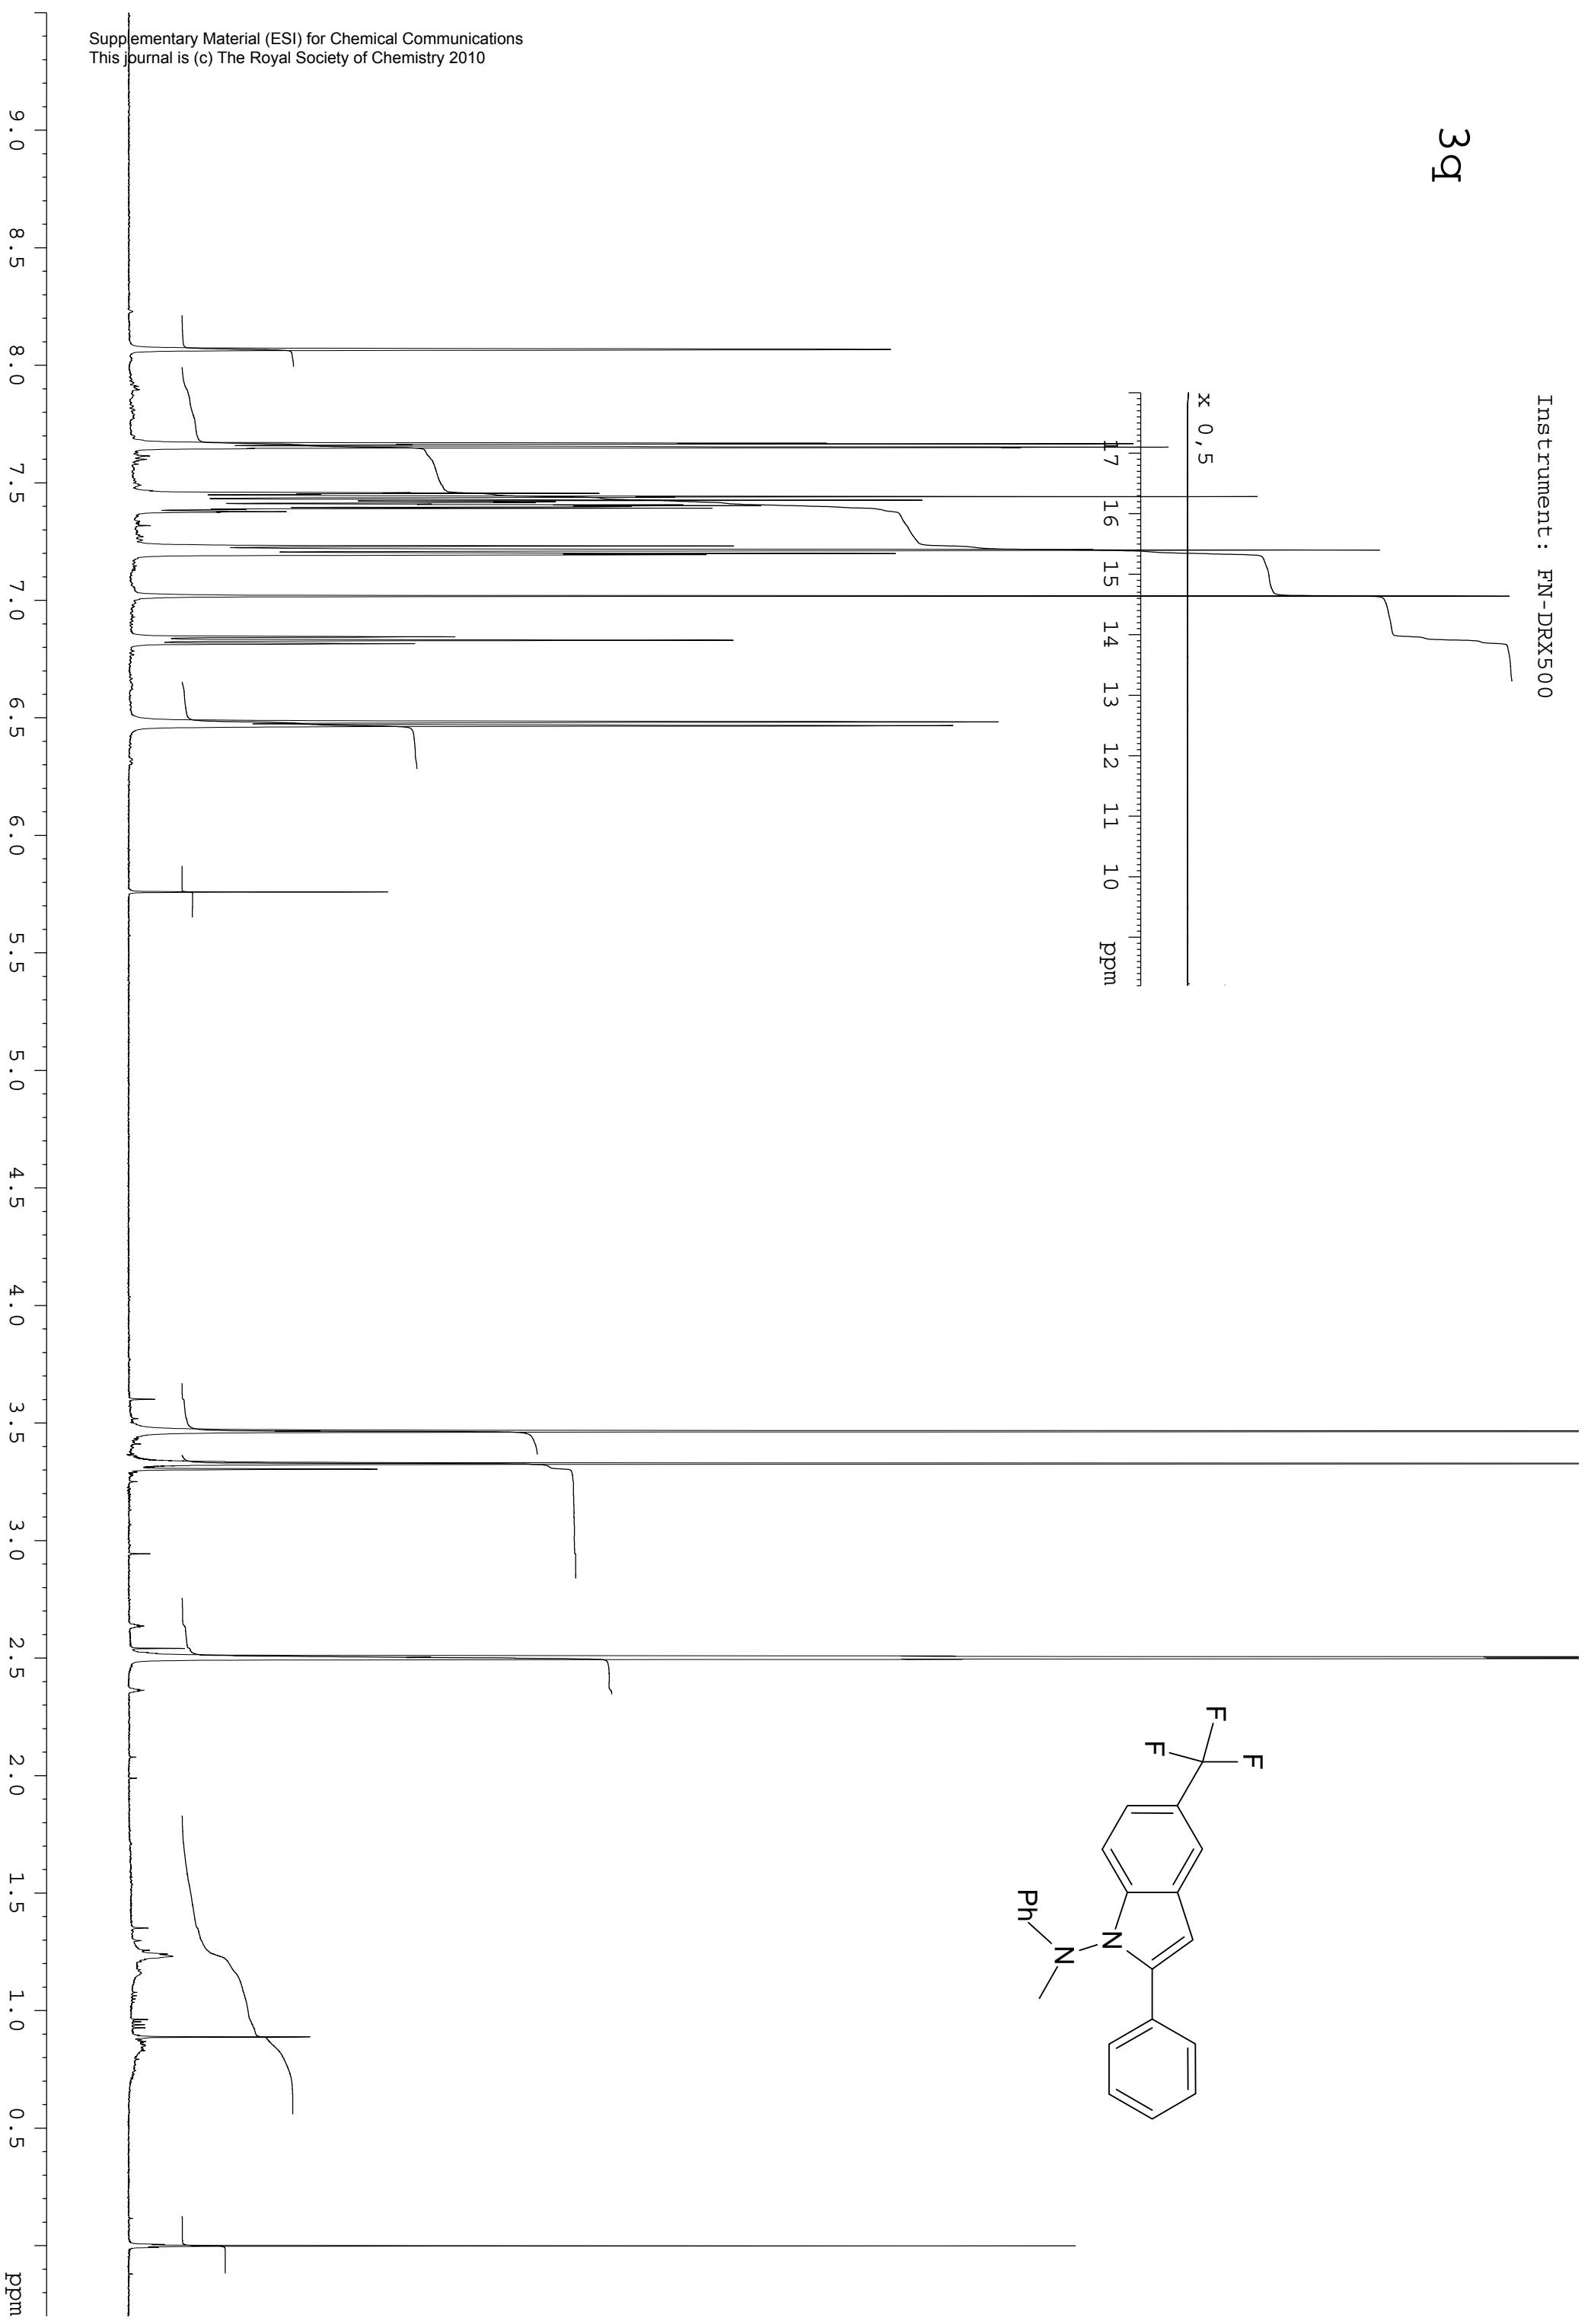

31

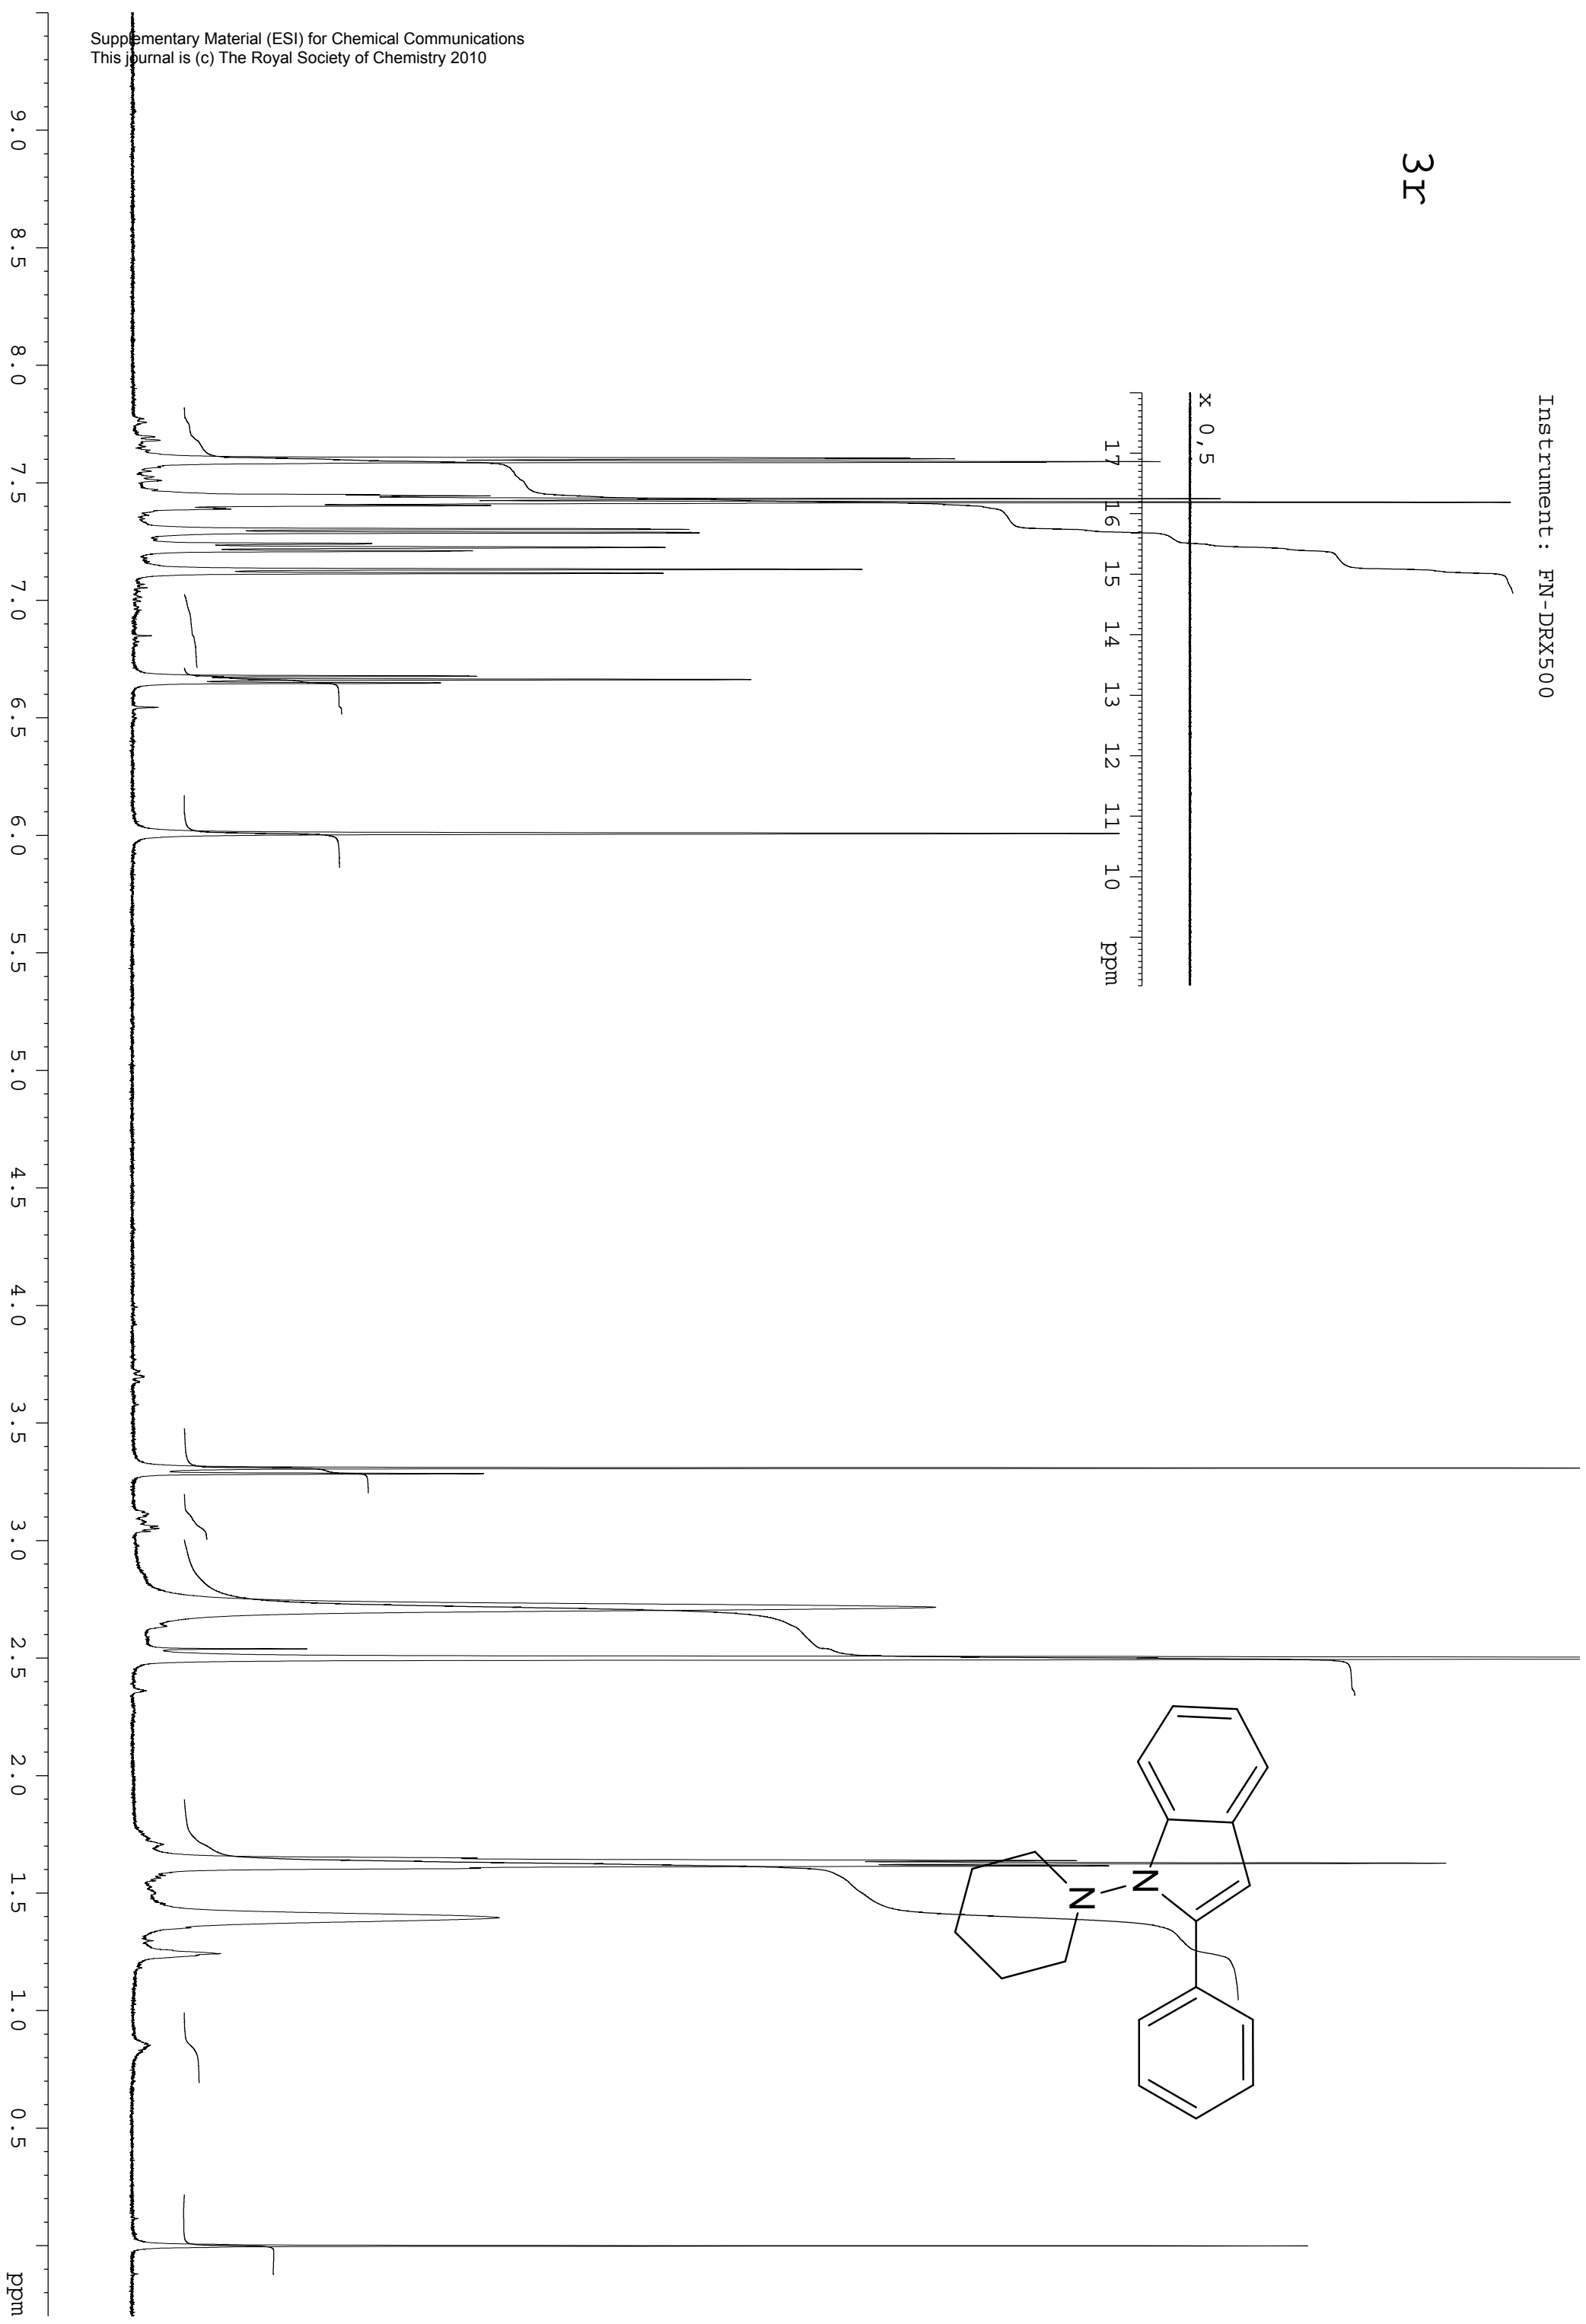

35

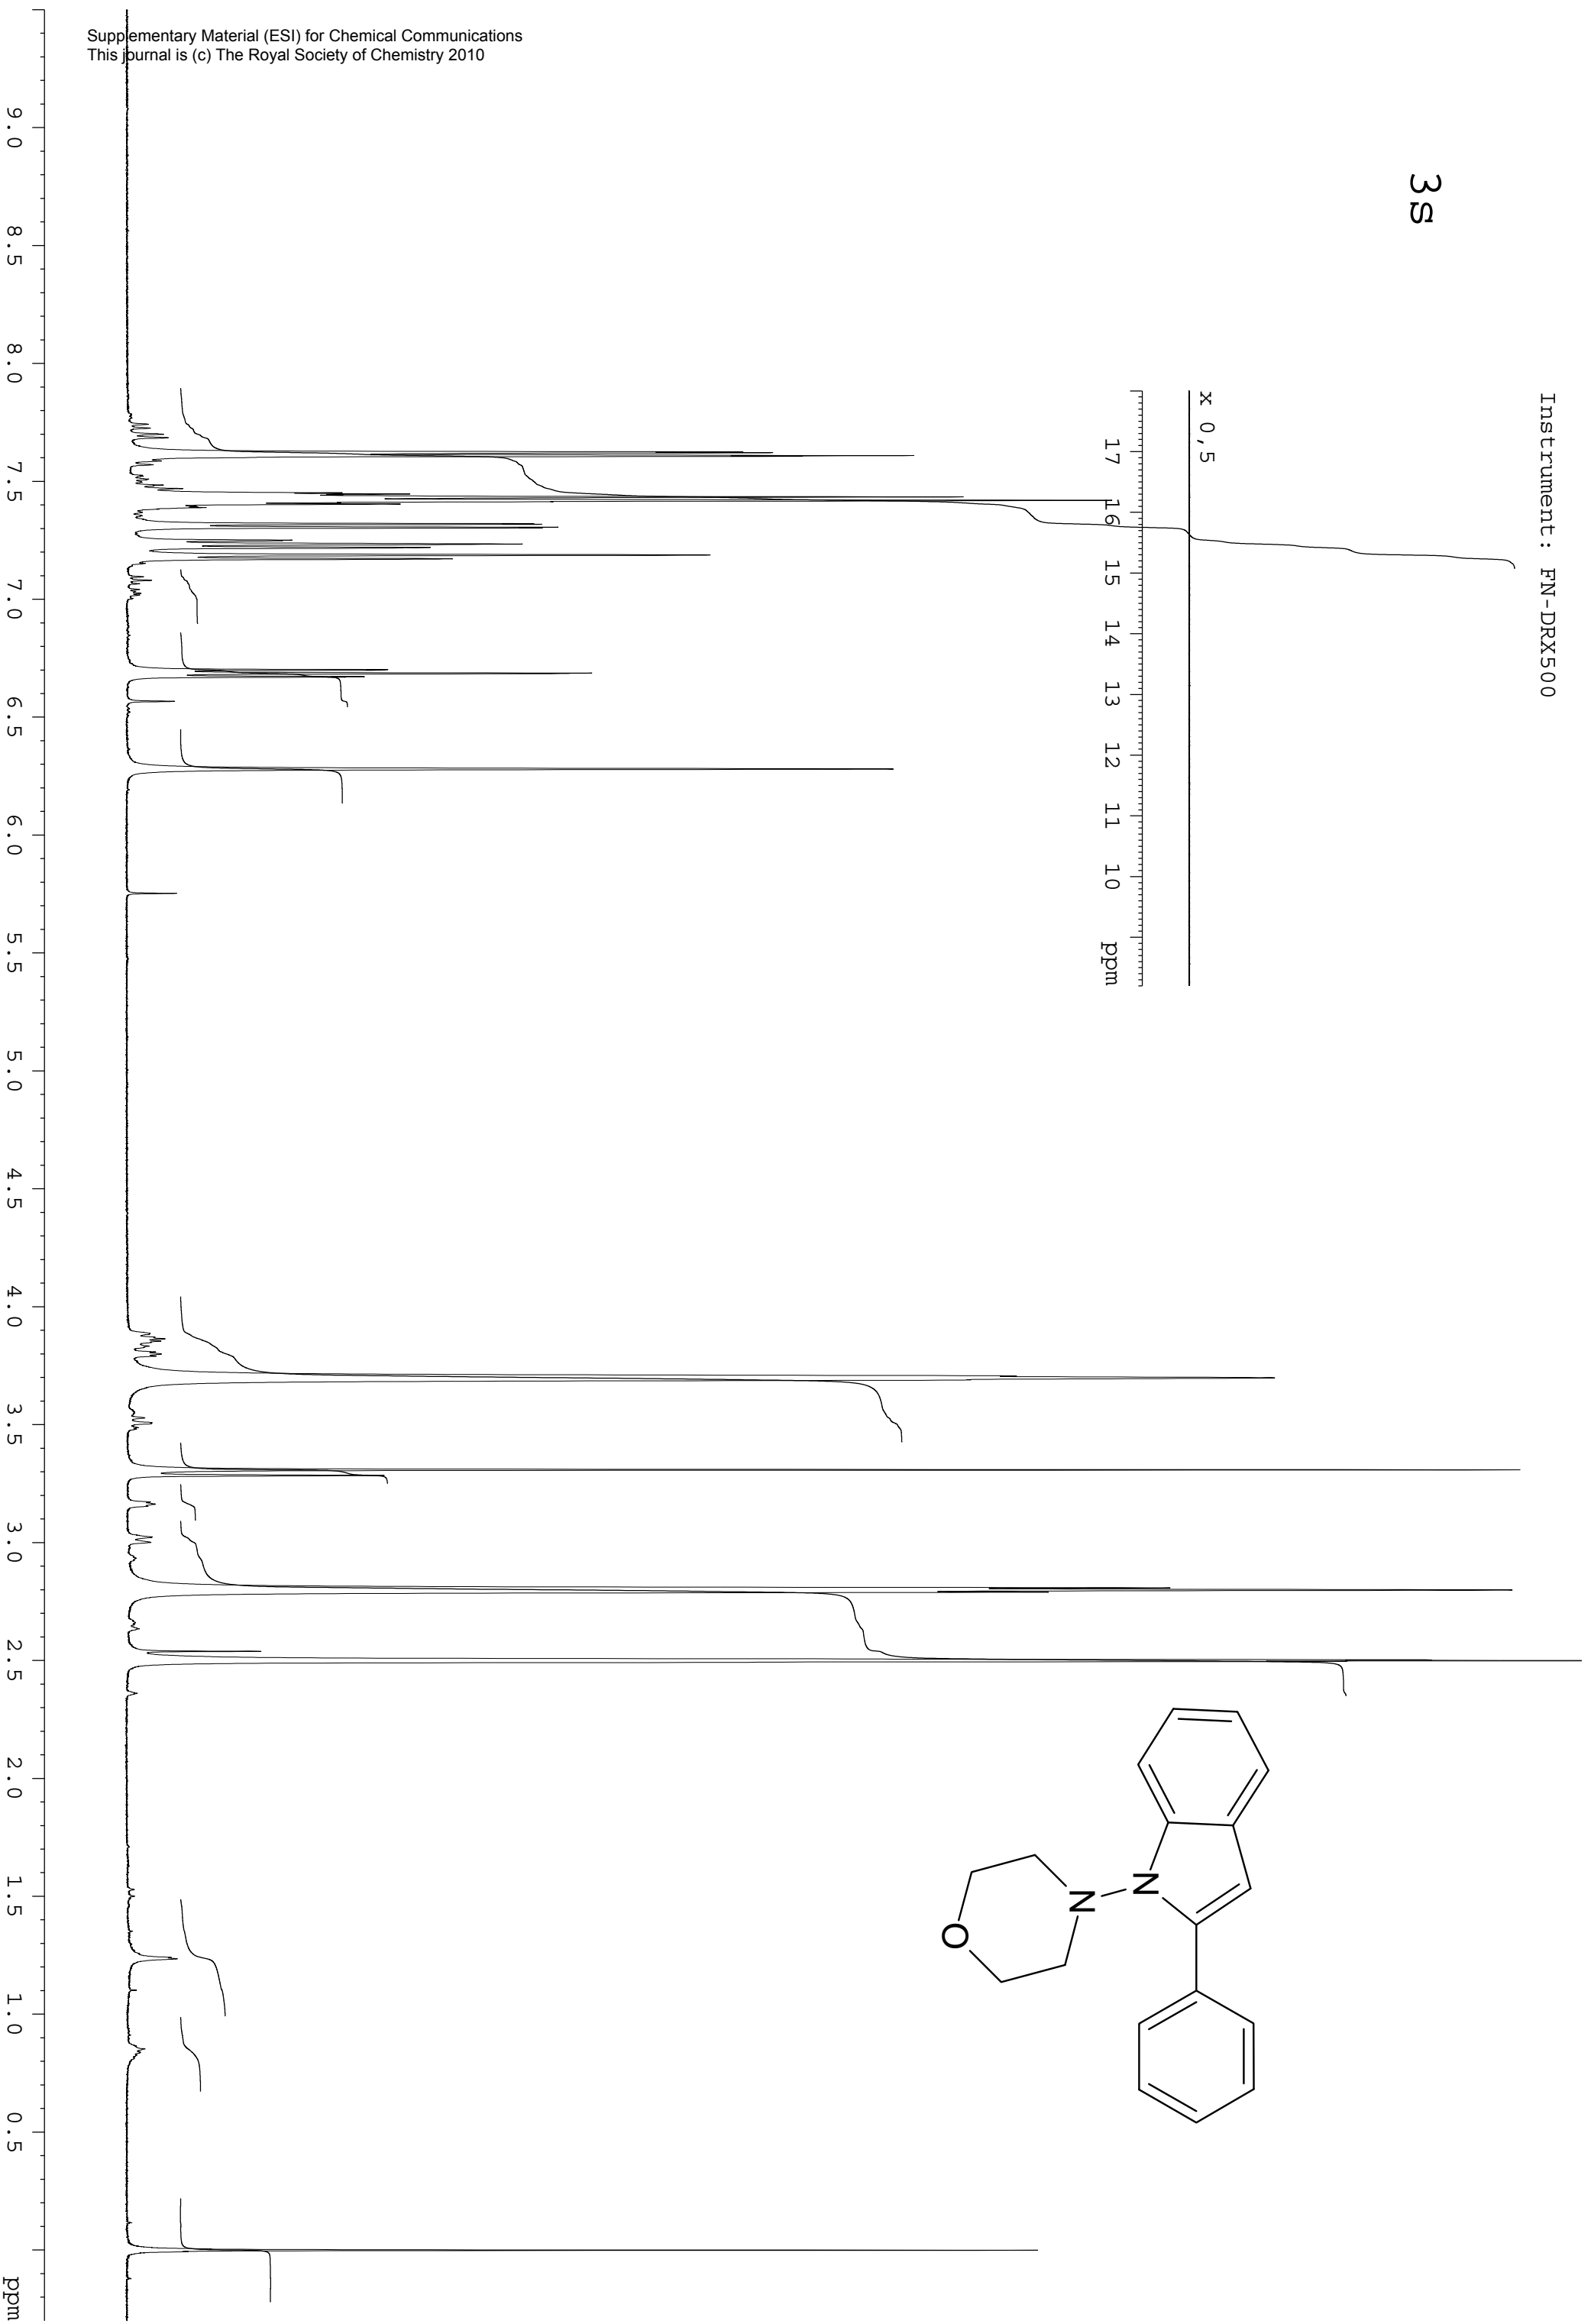

3f

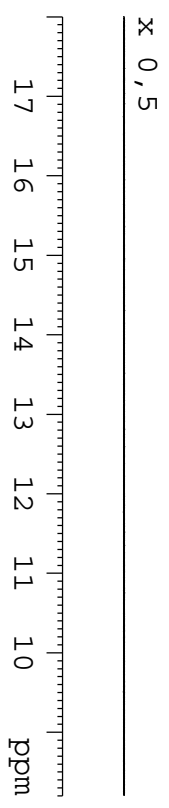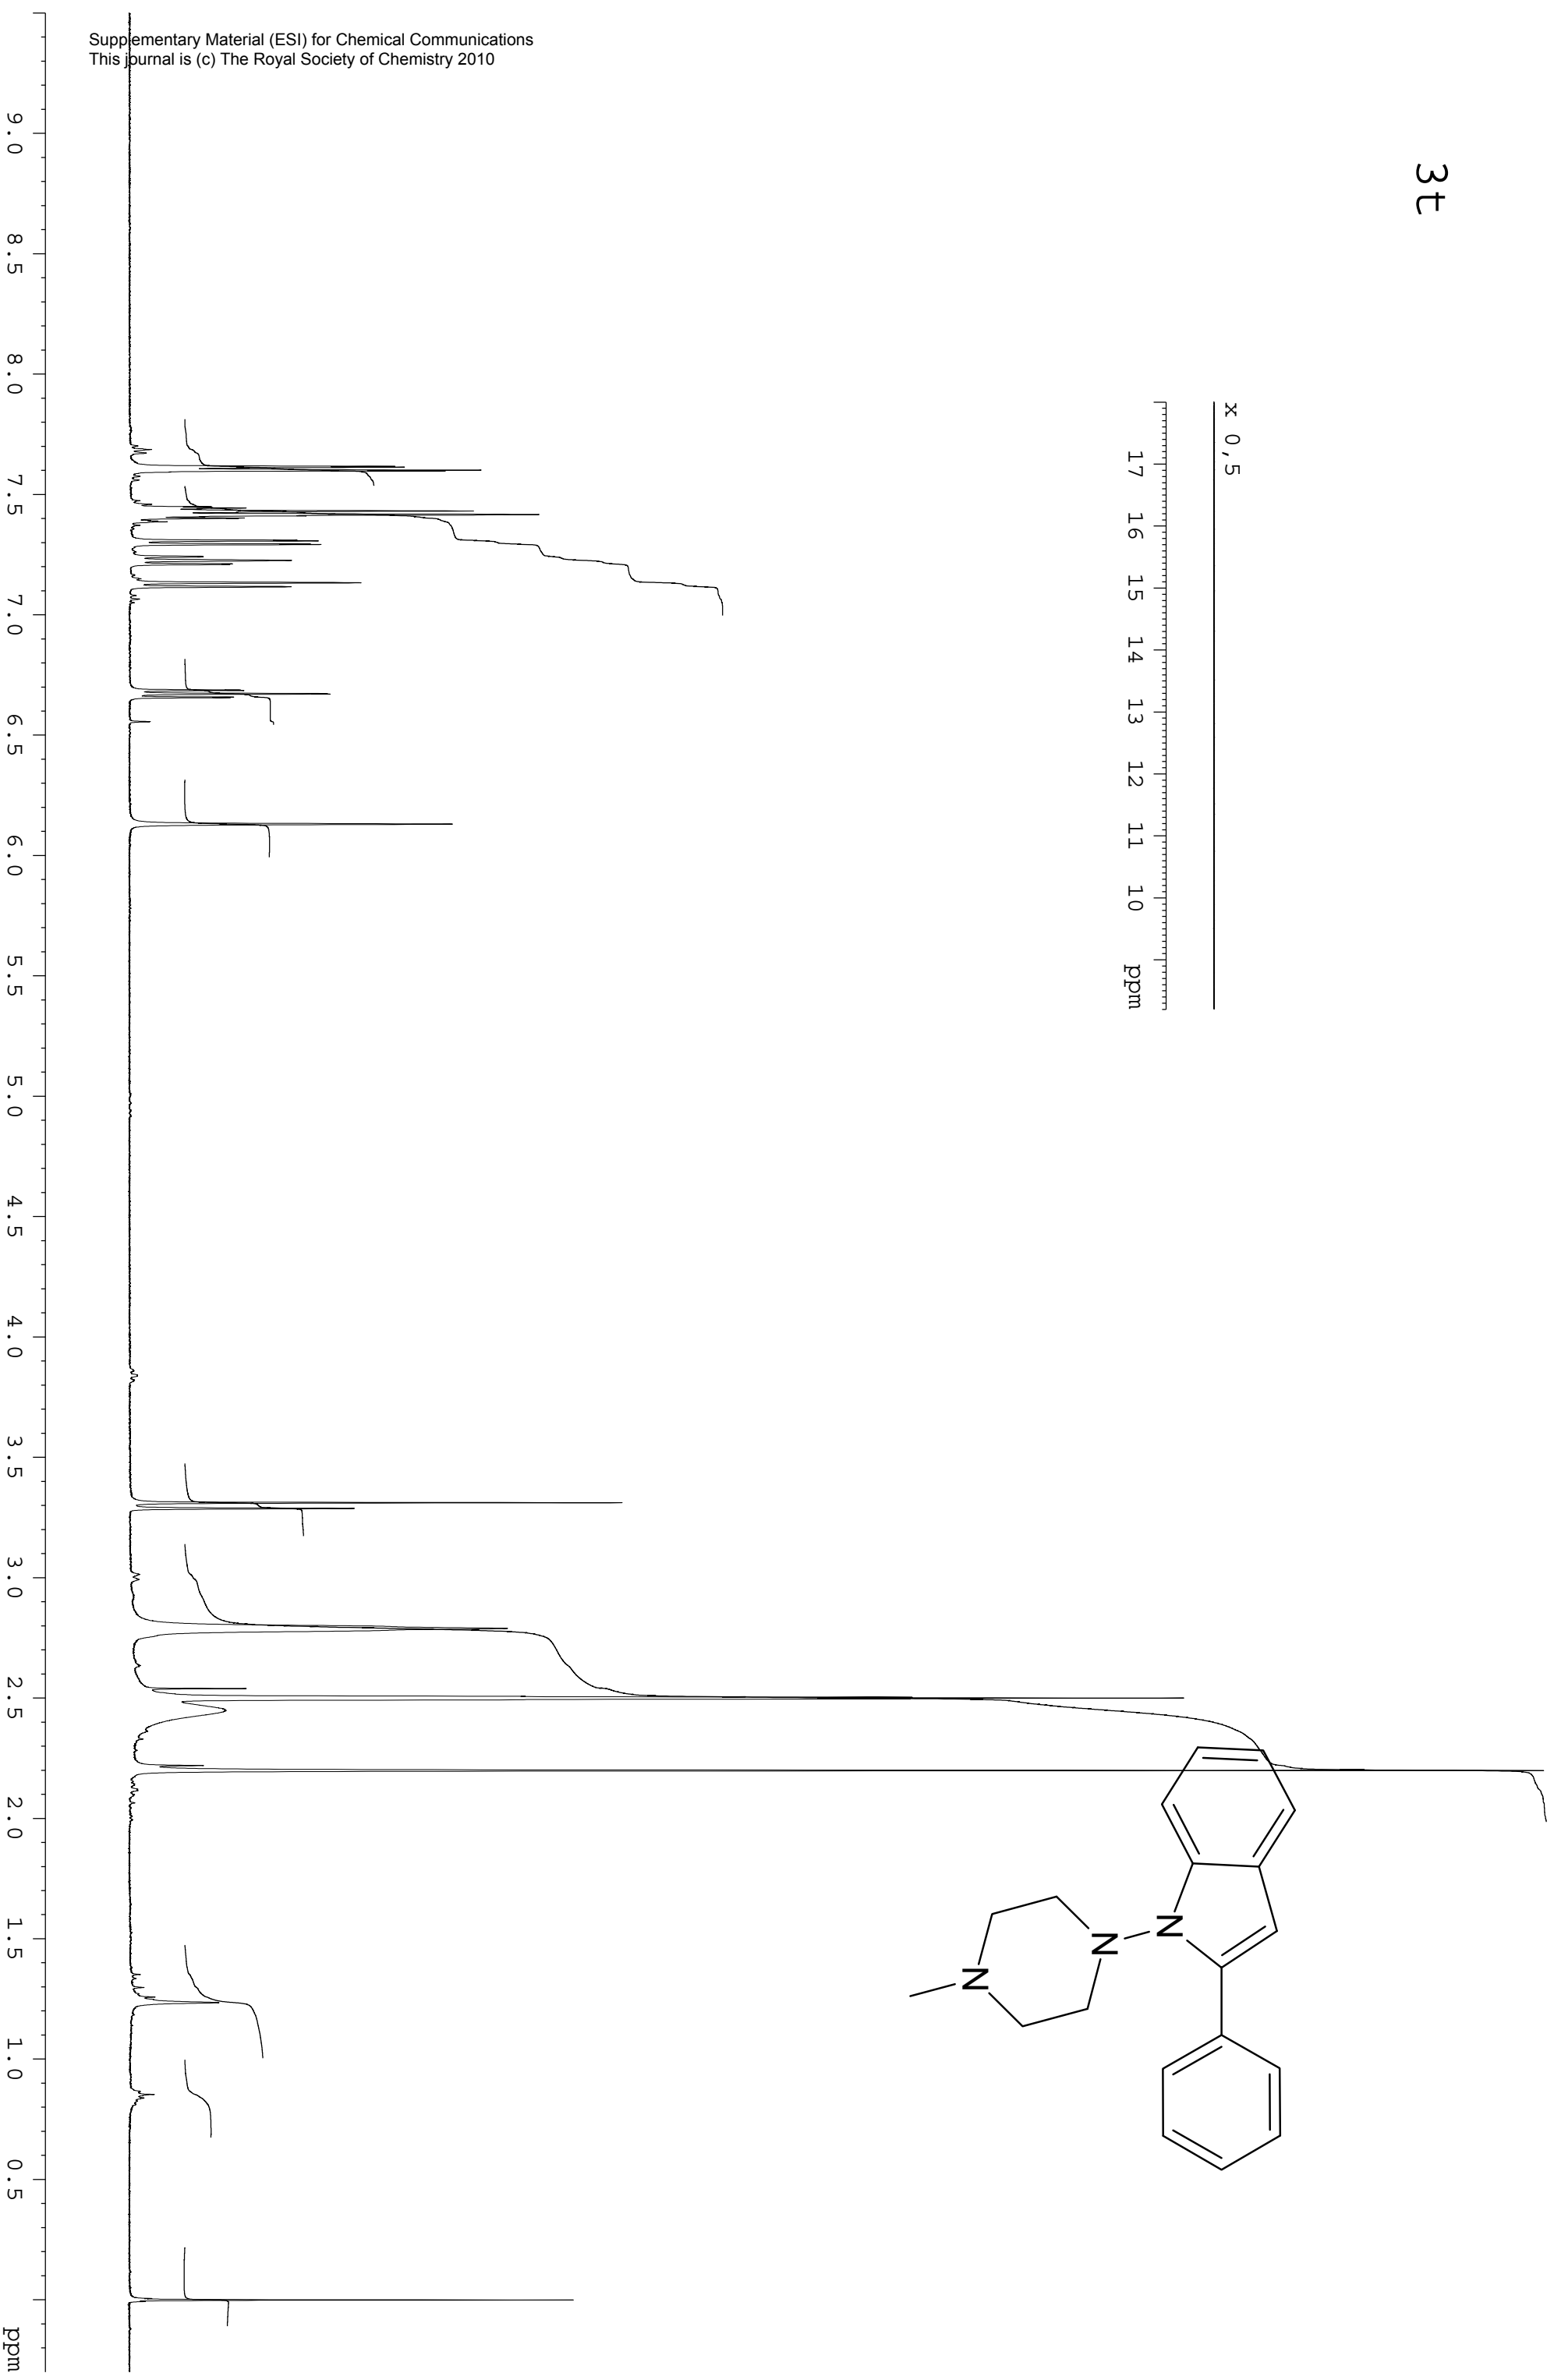

ppm

3u

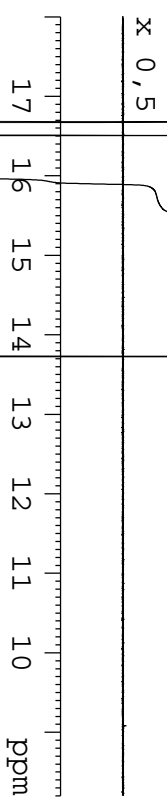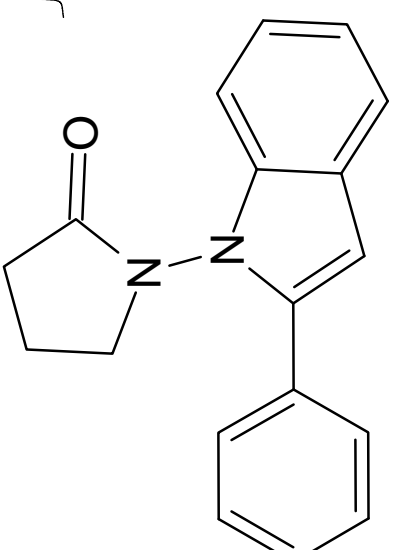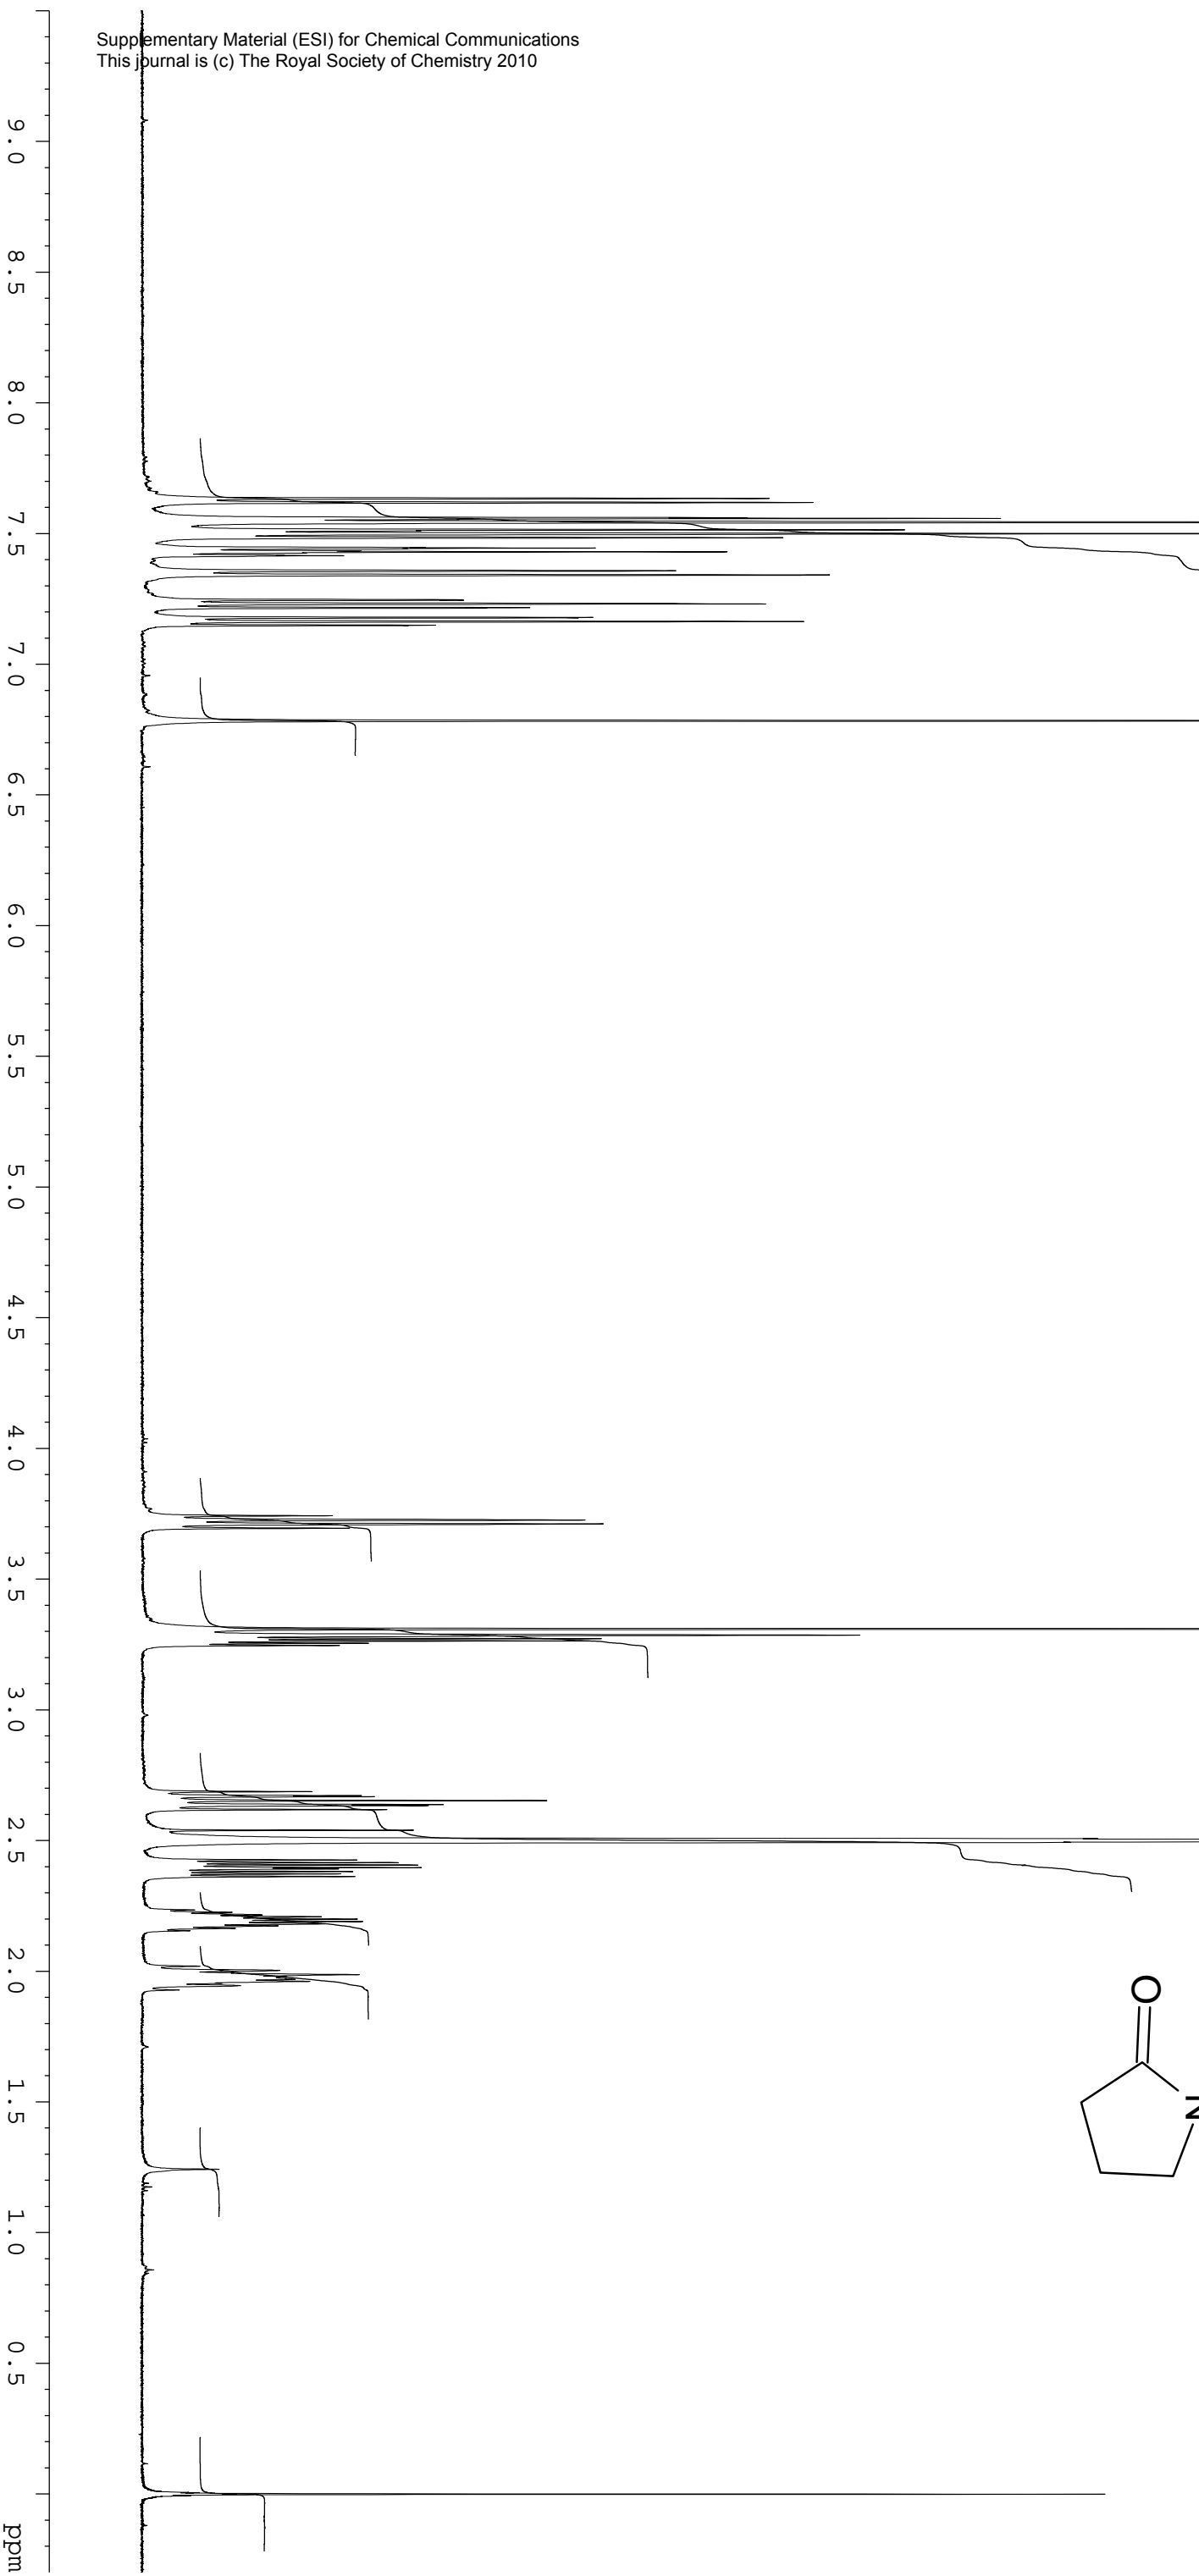

3V

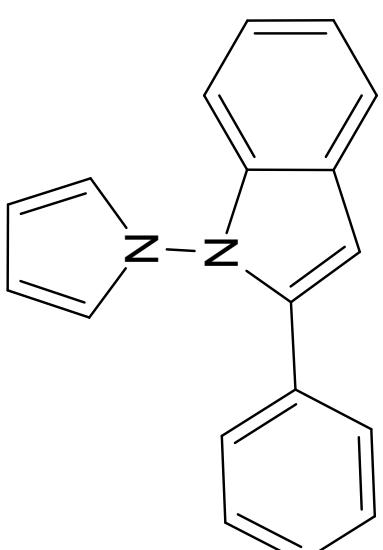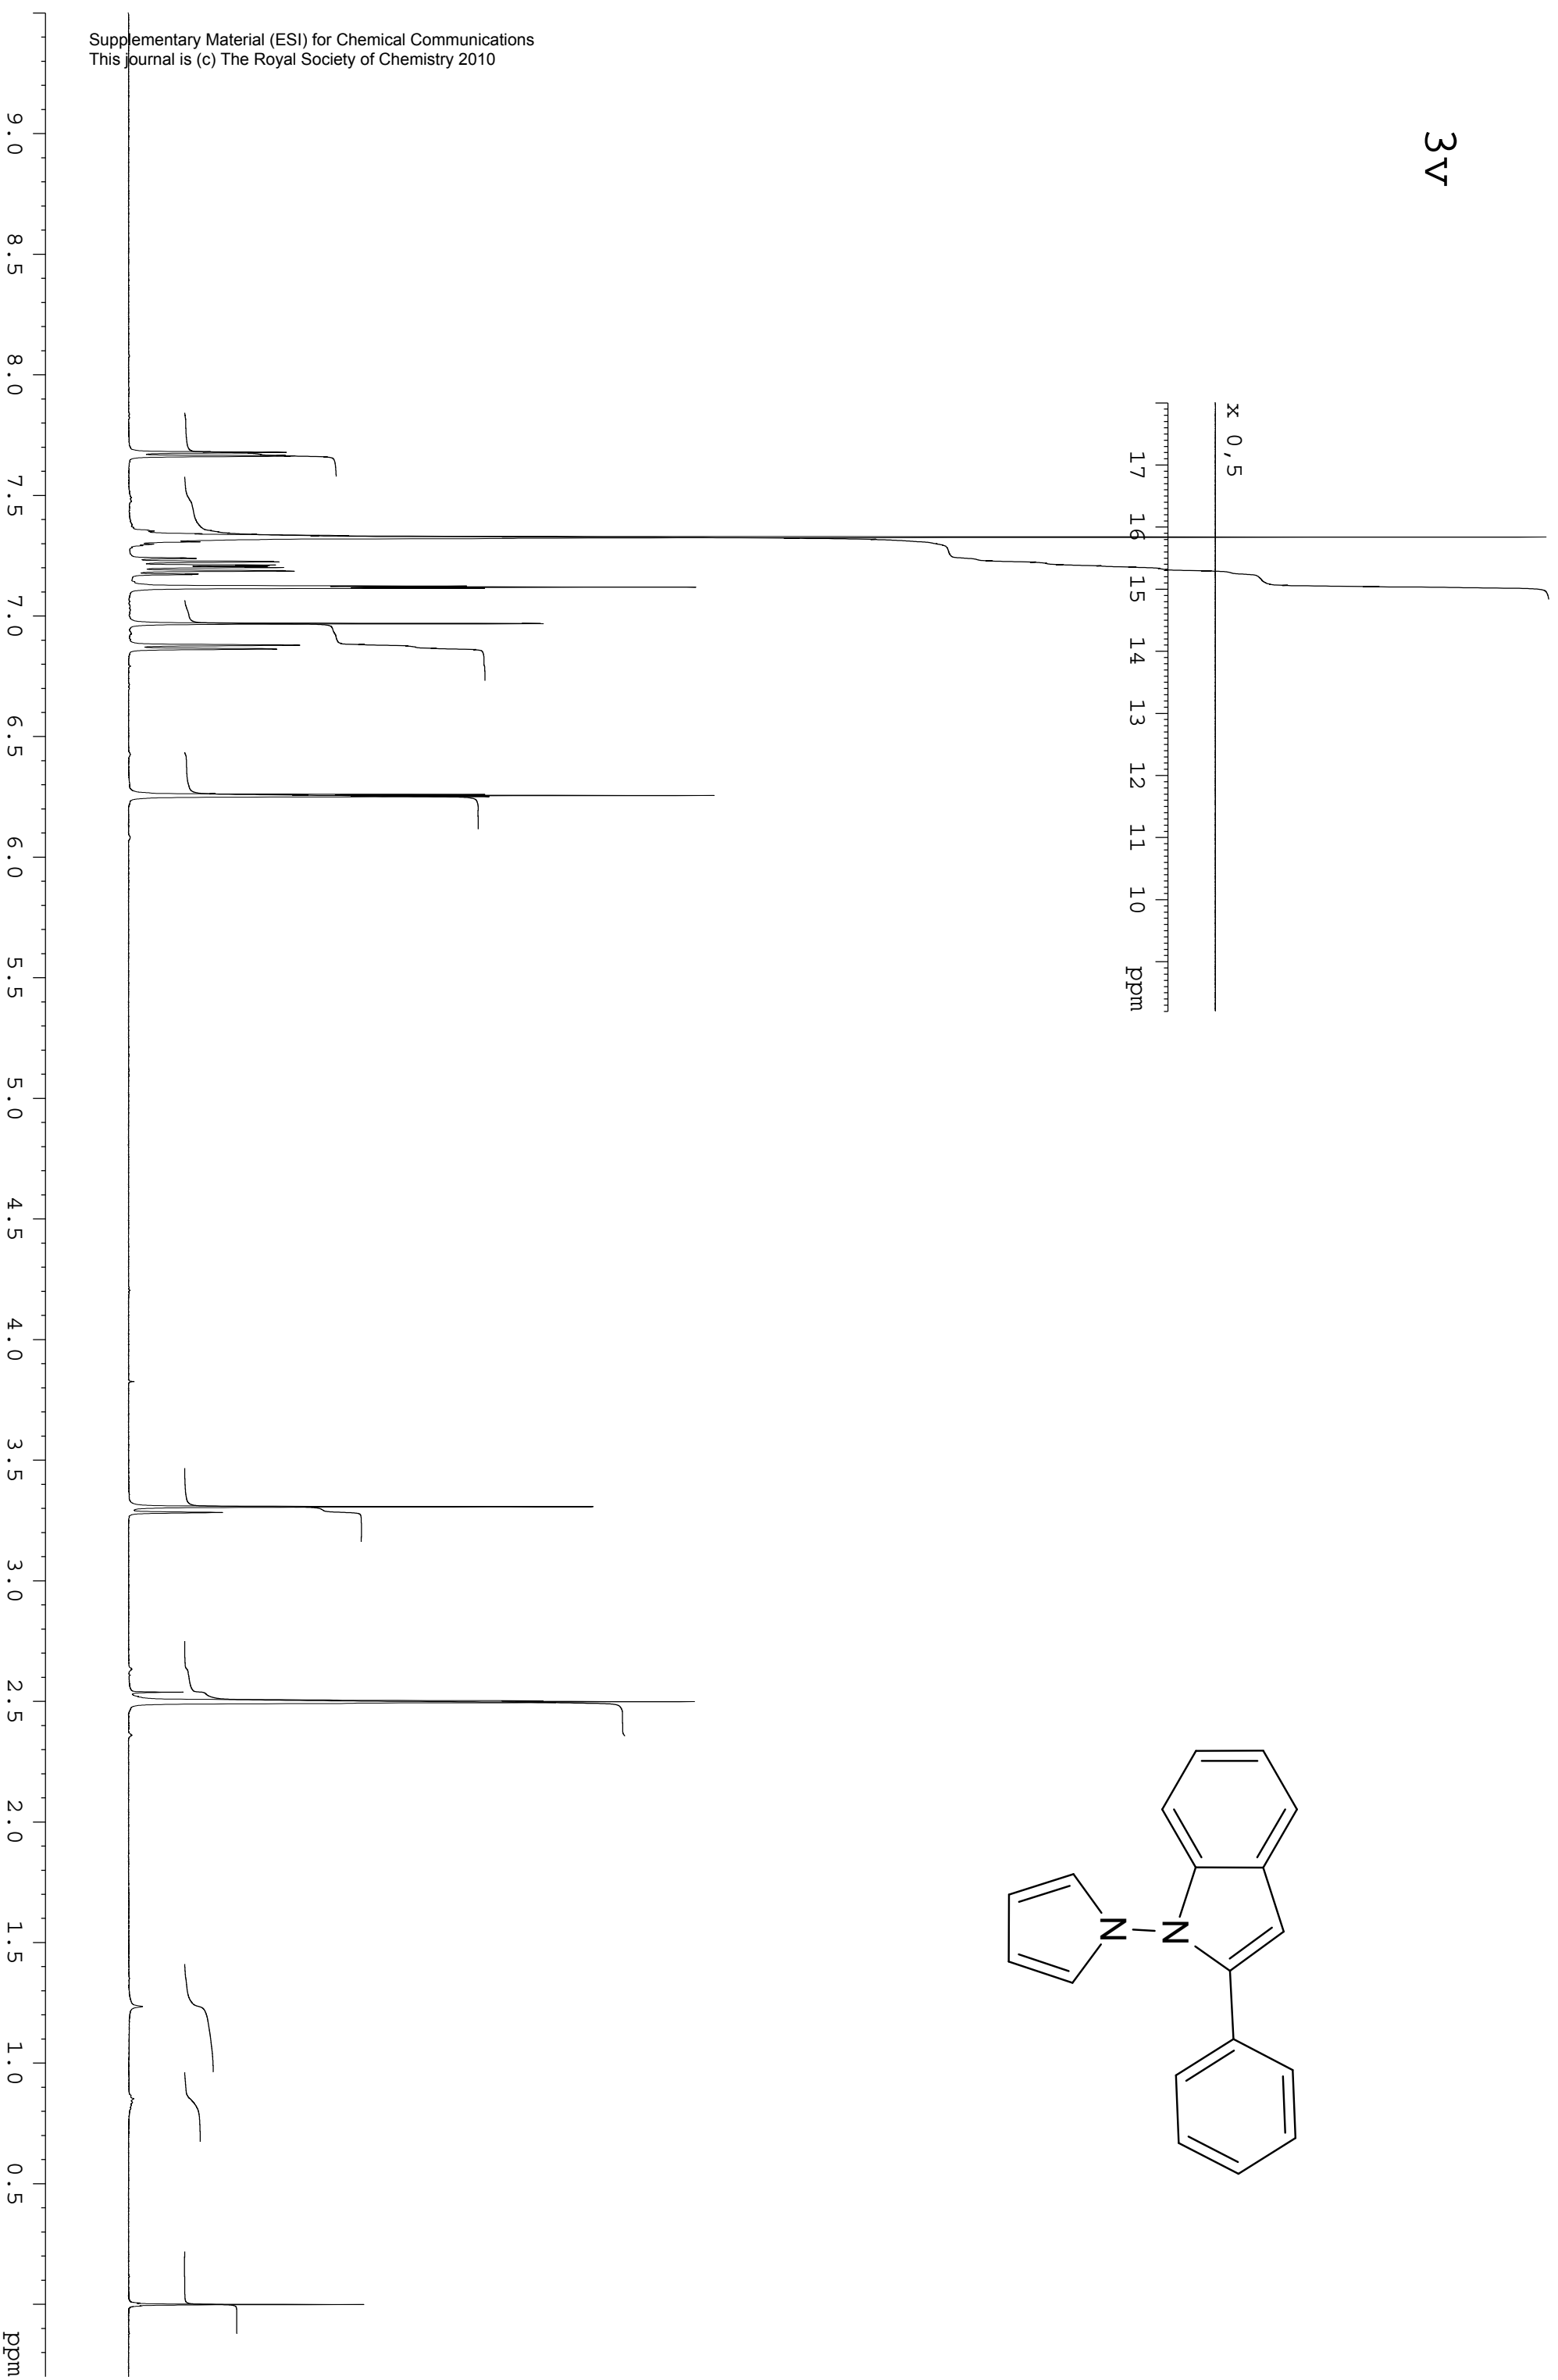



3w

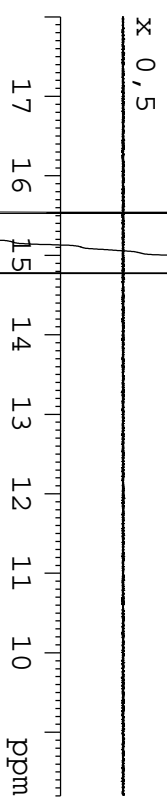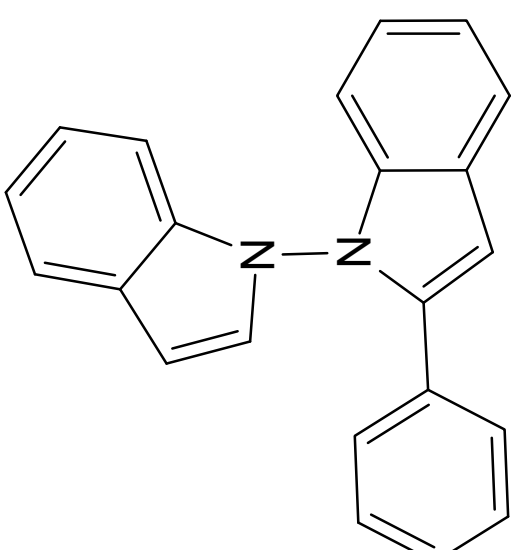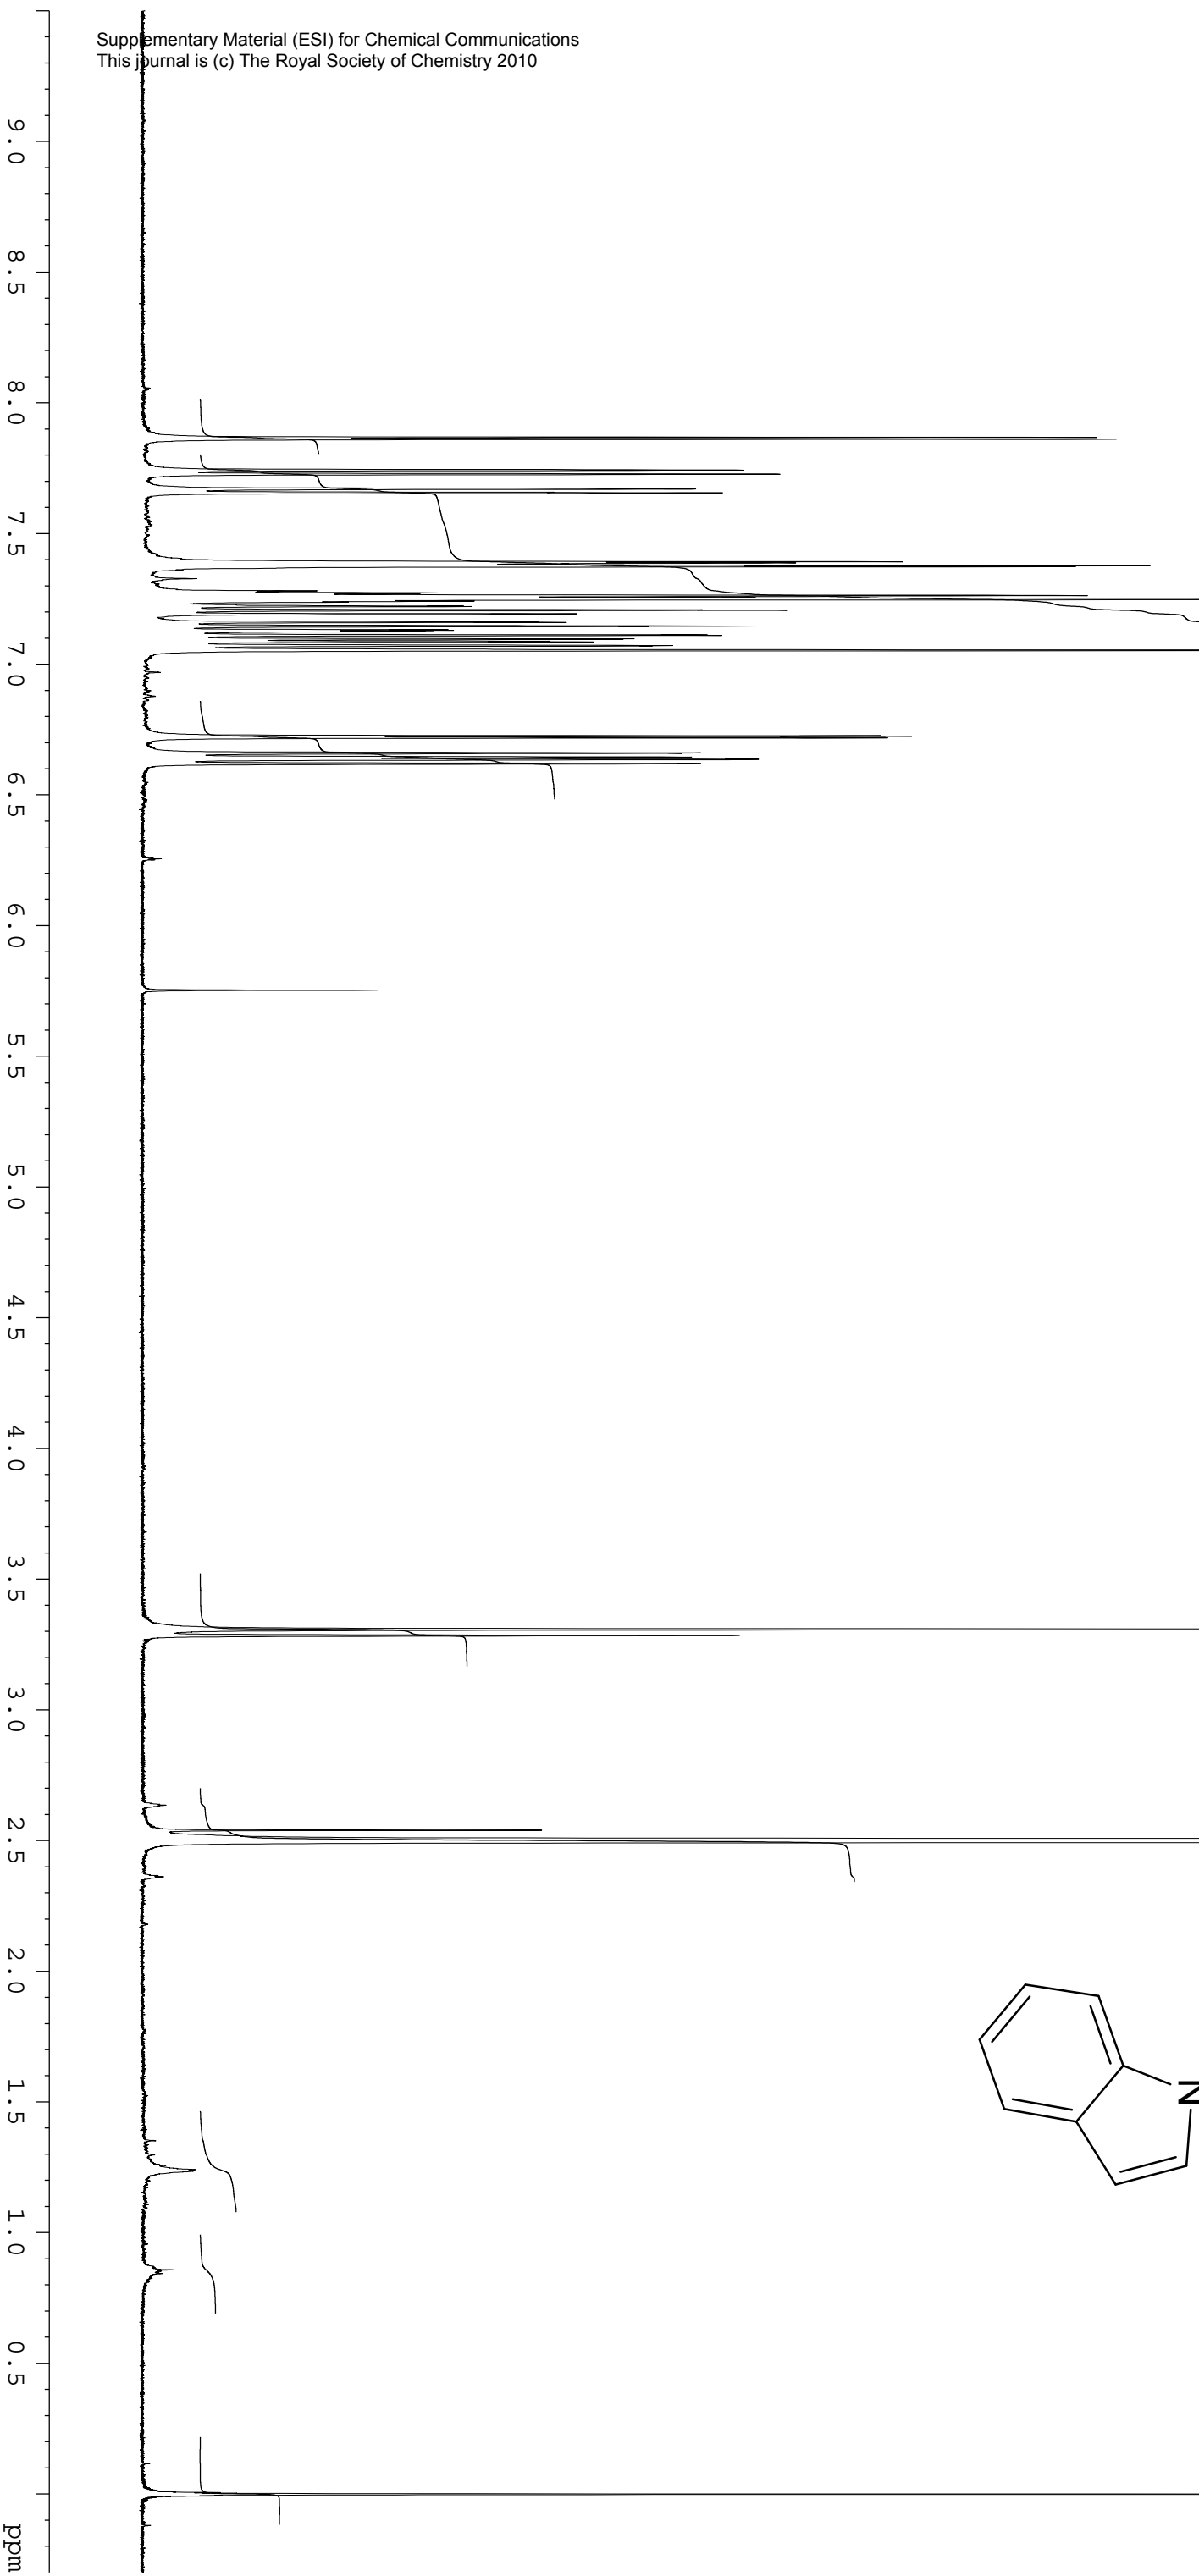

Supplement: c0cc03584j.pdf [file c0cc03584j.pdf]
